# Supplementary material
Source: PubMed Central journal article supplement (PMC6643397)
Supplement: ao7b00020_si_001.pdf [file ao7b00020_si_001.pdf]

# FD5180, a novel protein kinase affinity probe and the effect of bead loading on protein kinases identification

Fiona M. Deane,<sup>a†</sup> Andrew J. S. Lin,<sup>a†</sup> Peter G Hains,<sup>b†</sup> Sarah L. Pilgrim,<sup>a</sup> Phillip J Robinson<sup>b</sup> and  
Adam McCluskey<sup>a\*</sup>

<sup>a</sup> Chemistry, Centre for Chemical Biology, The University of Newcastle, University Drive,  
Callaghan NSW 2308 Australia. Phone: +61 249 216486; Fax: +61 249 215472; Email:  
Adam.McCluskey@newcastle.edu.au

<sup>b</sup> Cell Signalling Unit, Children's Medical Research Institute, The University of Sydney, Sydney,  
NSW 2145, Australia.

<sup>†</sup>Contributed equally to this project.

## Table of Contents

|                        |                                                                                                                                       |       |
|------------------------|---------------------------------------------------------------------------------------------------------------------------------------|-------|
| <b>Scheme S1</b>       | Synthetic Sequence of Modified Sunitinib                                                                                              | 2     |
| <b>Scheme S2</b>       | Synthetic Sequence of Modified Dasatinib                                                                                              | 2     |
| <b>Scheme S3</b>       | Synthetic Sequence of Modified Purvalanol B                                                                                           | 2     |
| <b>Table S1</b>        | Bead binding profile of background protein numbers                                                                                    | 3     |
| <b>Figures S1-S11</b>  | Protein kinase profile arising from the use of sepharose supported protein kinase inhibitors and an ethanolamine capped (blank) bead. | 4-14  |
| <b>Figures S12-S34</b> | Bead binding profile for specific proteins relative to beads used                                                                     | 15-22 |
| <b>Figure S35</b>      | Mini Bio-Spin Chromatography Columns for coupling reactions                                                                           | 22    |
| <b>Figures S36-S62</b> | <sup>1</sup> H and <sup>13</sup> C NMR Spectra of intermediates and final products                                                    | 22-49 |

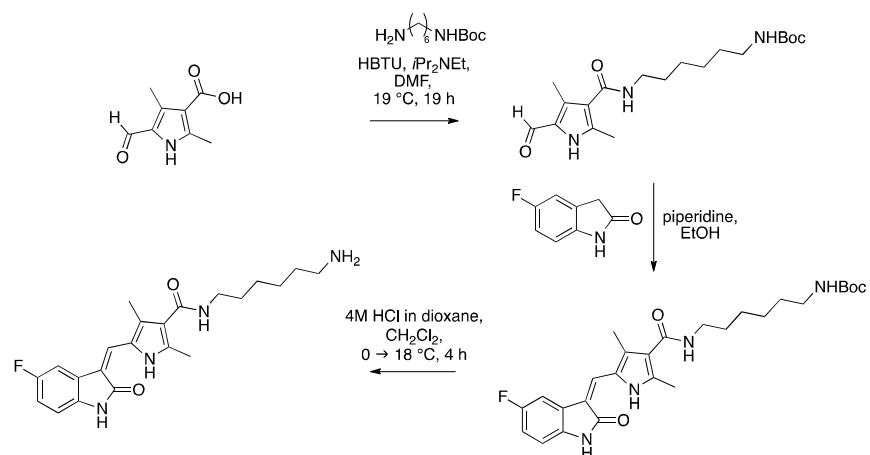

**Scheme S1:** Synthetic Sequence of Modified Sunitib

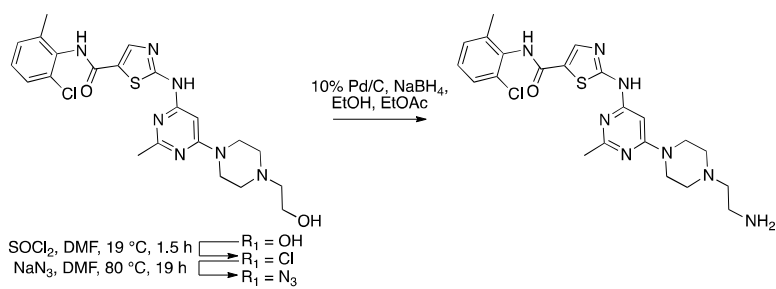

**Scheme S2:** Synthetic Sequence of Modified Dasatanib

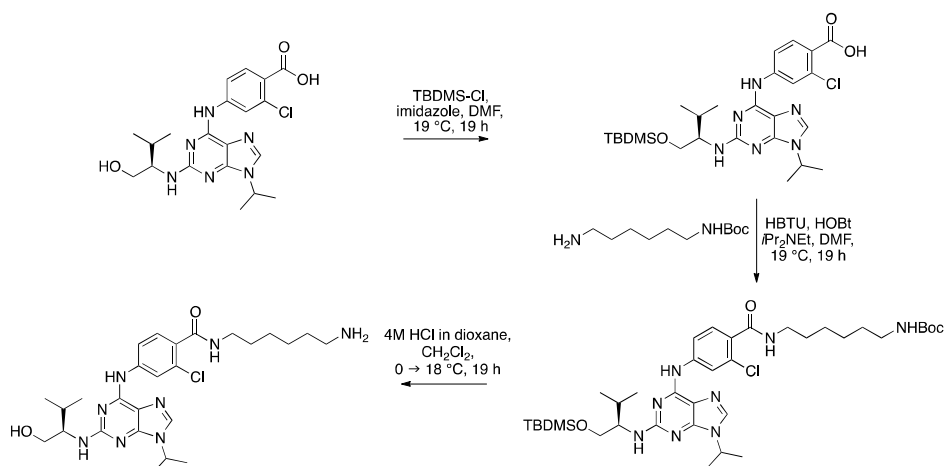

**Scheme S3:** Synthetic Sequence of Modified Purvalanol B

**Table S1.** Background protein numbers determined after bead exposure to HeLa cell lysate.

| <b>Loading (%)</b>                        | <b>BIMX (S1) No. proteins</b> | <b>CZC8004 (S2) No. proteins</b> |
|-------------------------------------------|-------------------------------|----------------------------------|
| 0.1                                       | 915                           | 1657                             |
| 0.5                                       | 832                           | 755                              |
| 1                                         | 895                           | 902                              |
| 2                                         | 949                           | 726                              |
| 5                                         | 1214                          | 1083                             |
| 10                                        | 1176                          | 961                              |
| 25                                        | 1221                          | 1235                             |
| 50                                        | 1415                          | 1374                             |
| Proteins common to all loadings           | 369                           | 322                              |
| Proteins common to all S1 and S2 loadings |                               | 273                              |
| Proteins common to S1, S2 and blank       |                               | 271                              |

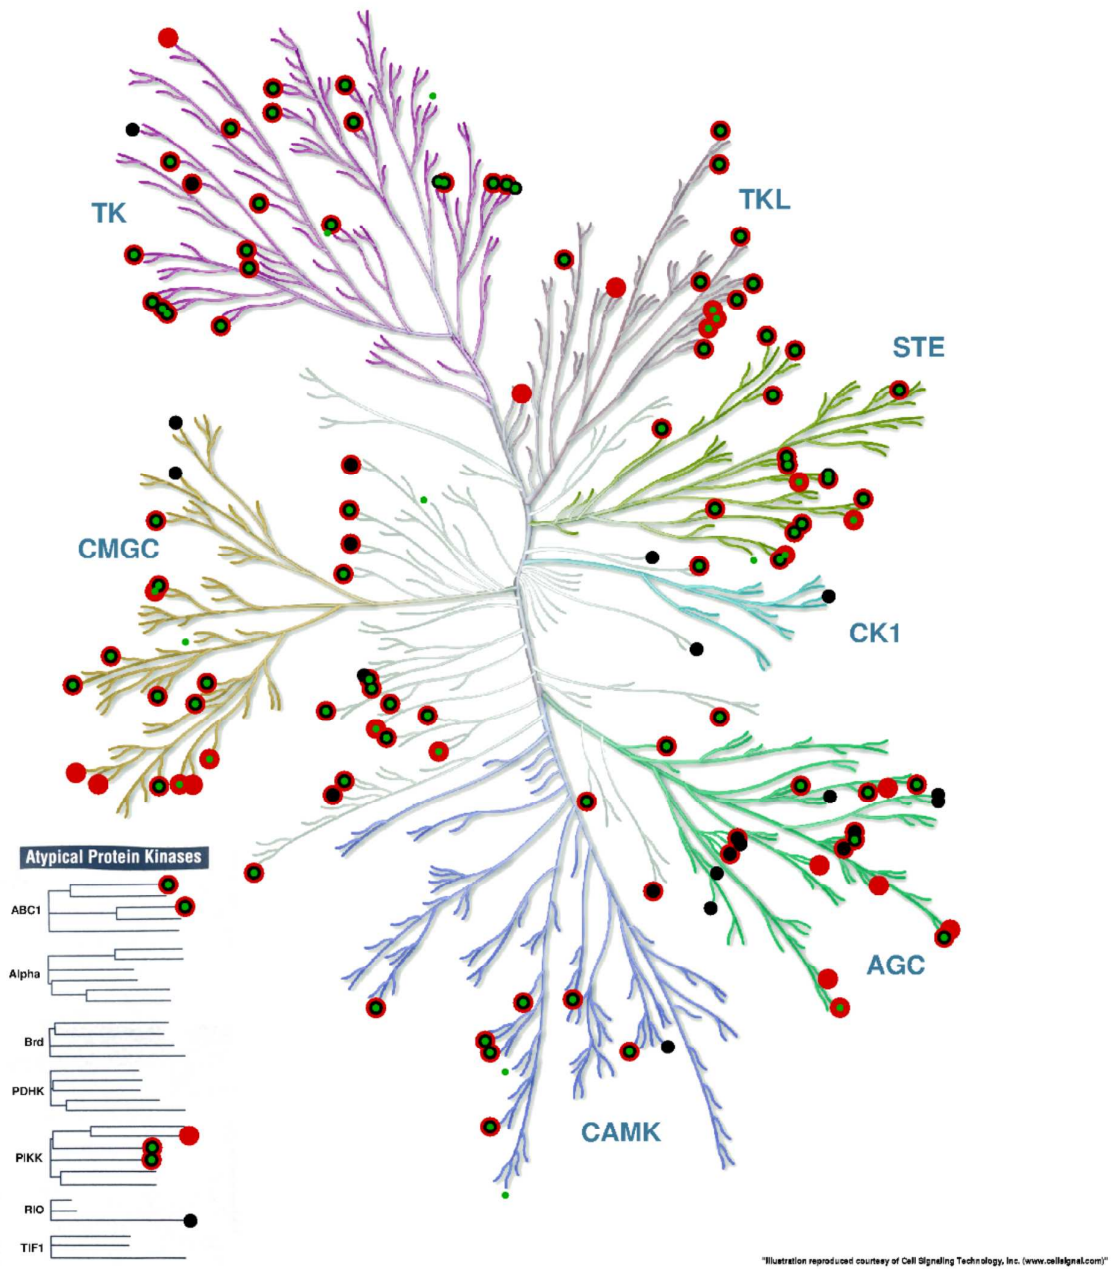

**Figure S1:** Comparison of protein kinases pulled down using the CTX-0294885 (S9, black), KC19 (S10, green) and hybrid (S15, red) kinase affinity beads. Illustration reproduced courtesy of Cell Signalling Technology, Inc. (www.cellsignal.com).

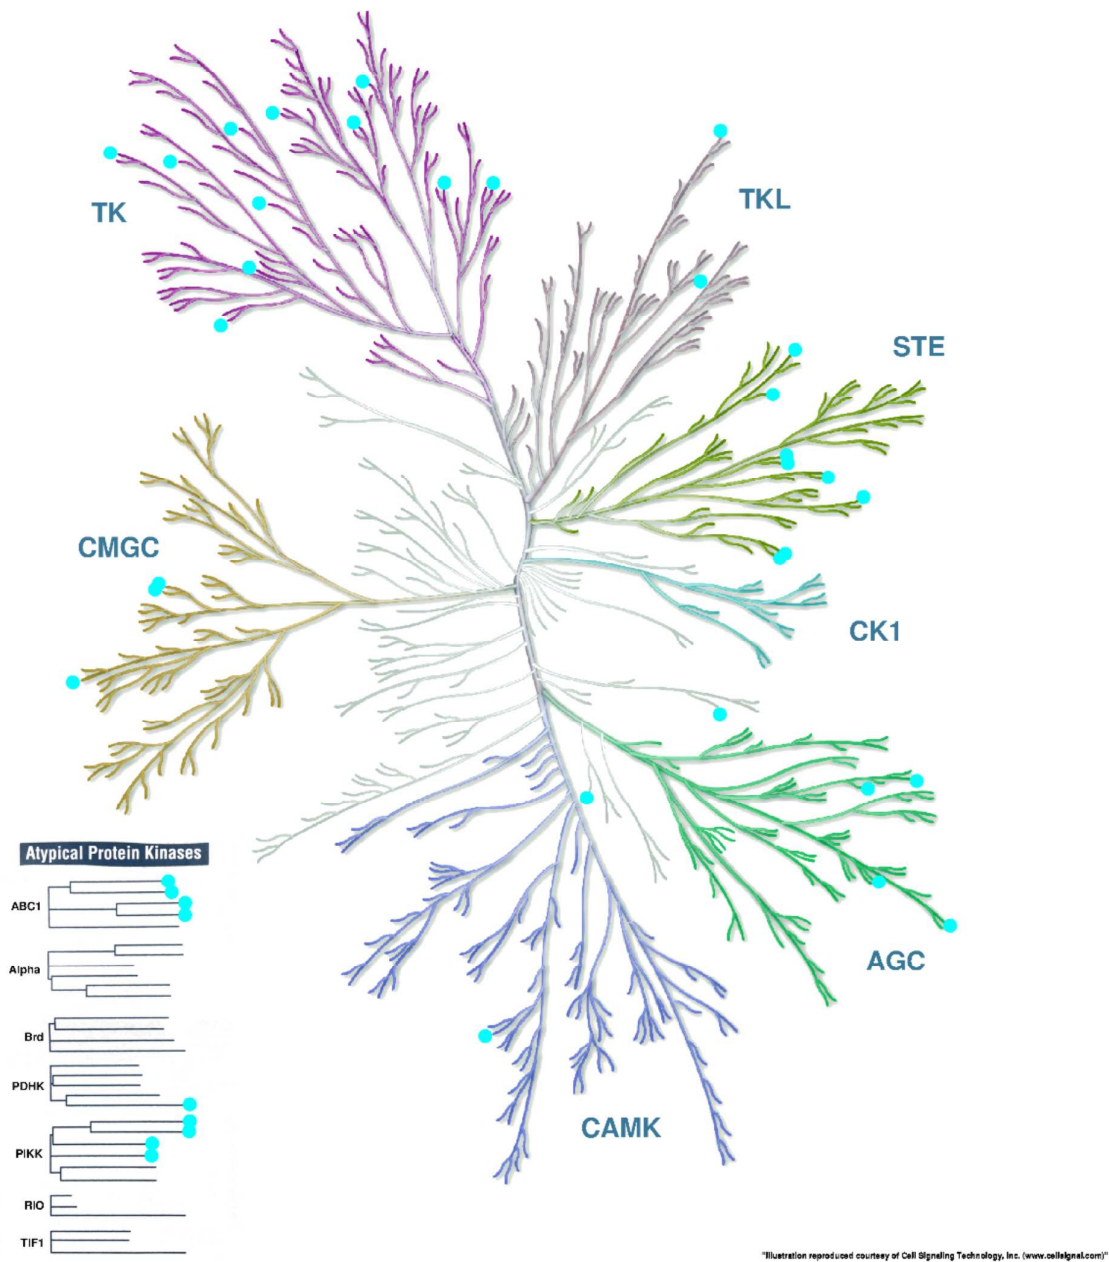

**Figure S2:** Comparison of protein kinases pulled down using BIMX (S1) kinase affinity beads. Illustration reproduced courtesy of Cell Signalling Technology, Inc. [www.cellsignal.com](http://www.cellsignal.com).

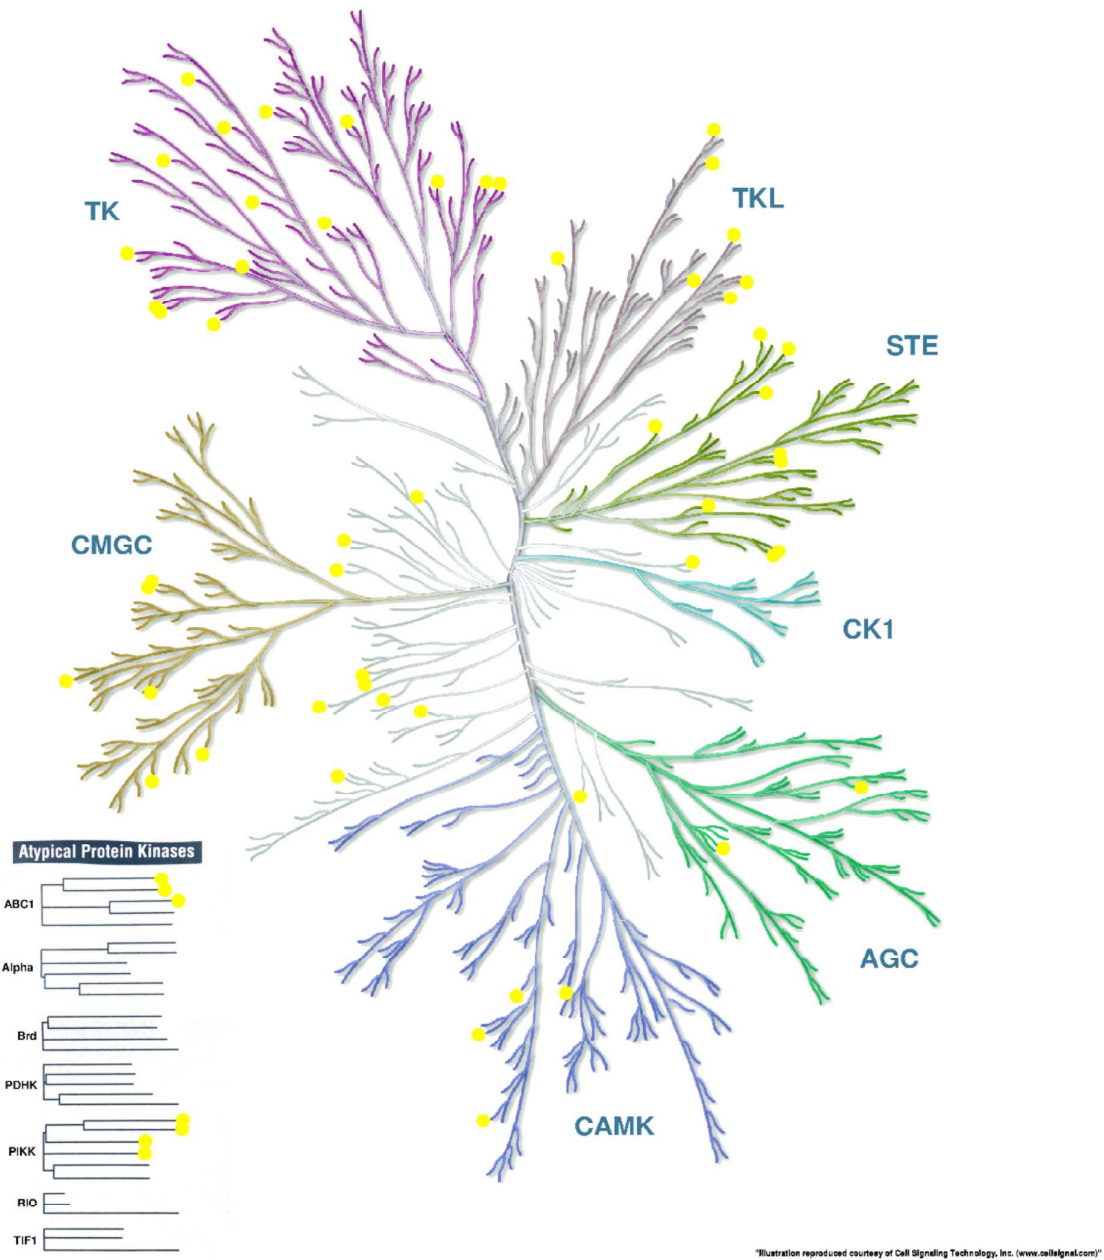

**Figure S3:** Comparison of protein kinases pulled down using CZC8004 (S2) kinase affinity beads. Illustration reproduced courtesy of Cell Signalling Technology, Inc. [www.cellsignal.com](http://www.cellsignal.com).

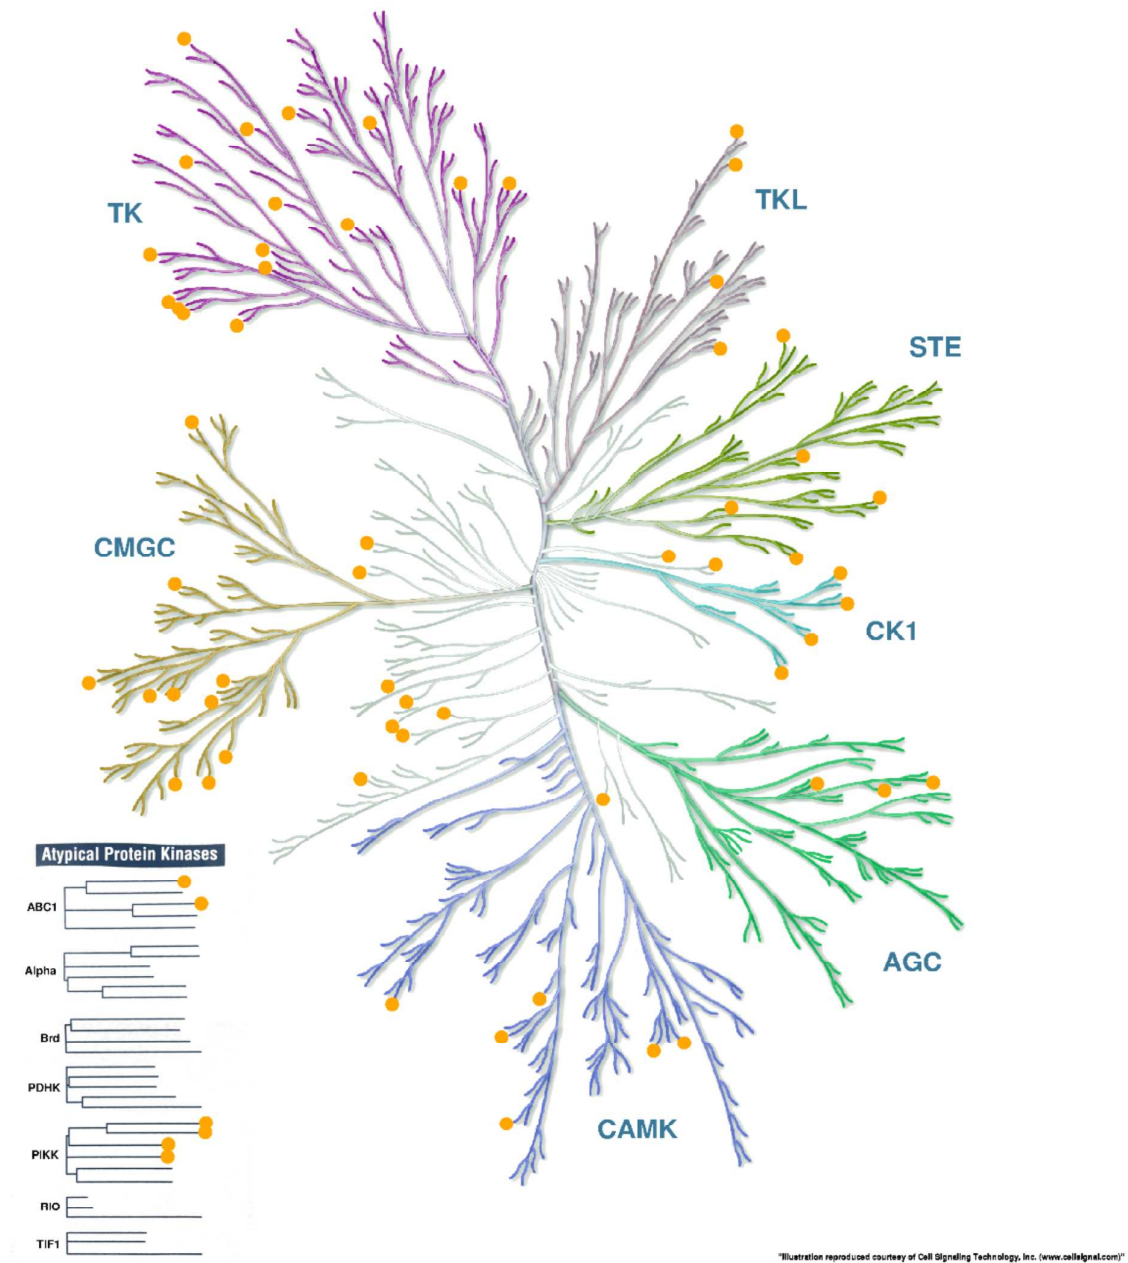

**Figure S4:** Comparison of protein kinases pulled down using Purvalanol B (S6) kinase affinity beads. Illustration reproduced courtesy of Cell Signalling Technology, Inc. [www.cellsignal.com](http://www.cellsignal.com).

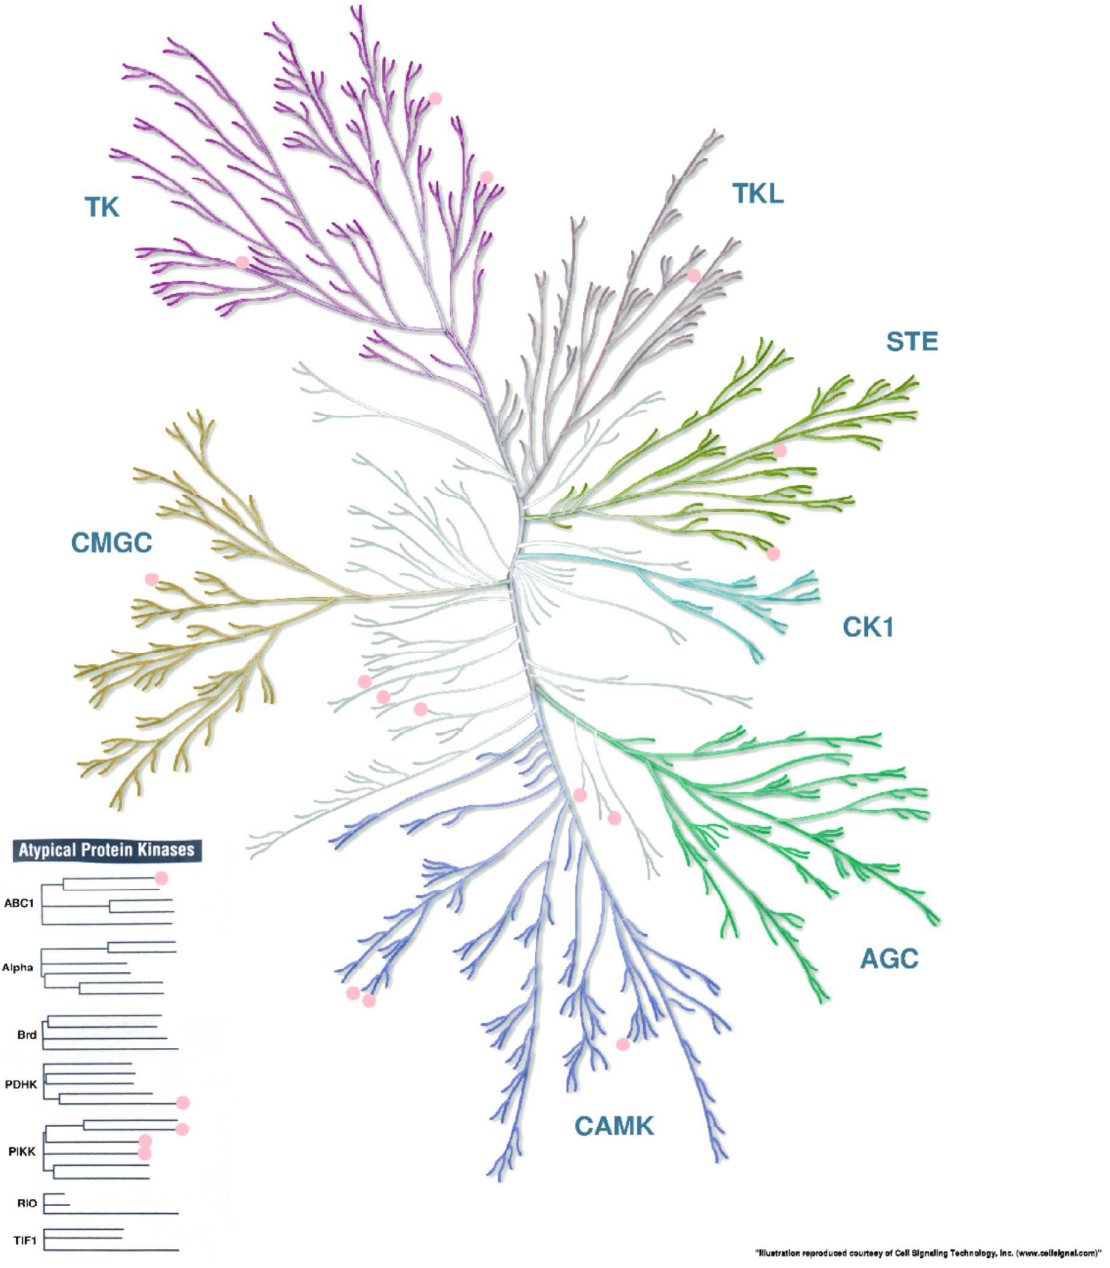

**Figure S5:** Comparison of protein kinases pulled down using Sunitinib (S7) kinase affinity beads. Illustration reproduced courtesy of Cell Signalling Technology, Inc. [www.cellsignal.com](http://www.cellsignal.com).



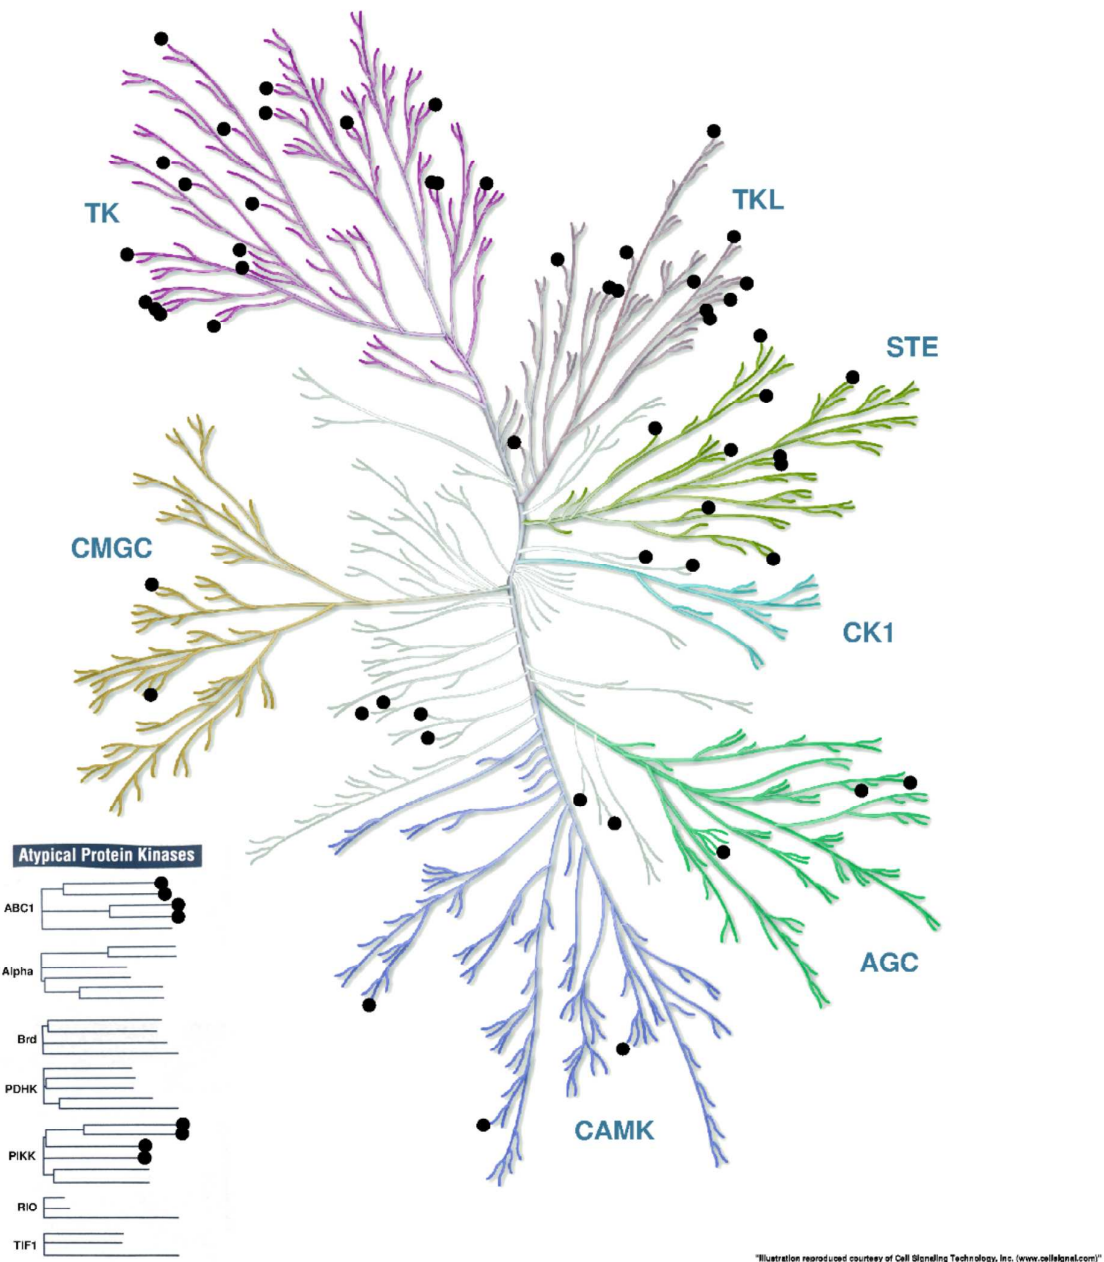

**Figure S6:** Comparison of protein kinases pulled down using Dasitinib (S8) kinase affinity beads. Illustration reproduced courtesy of Cell Signalling Technology, Inc. [www.cellsignal.com](http://www.cellsignal.com).

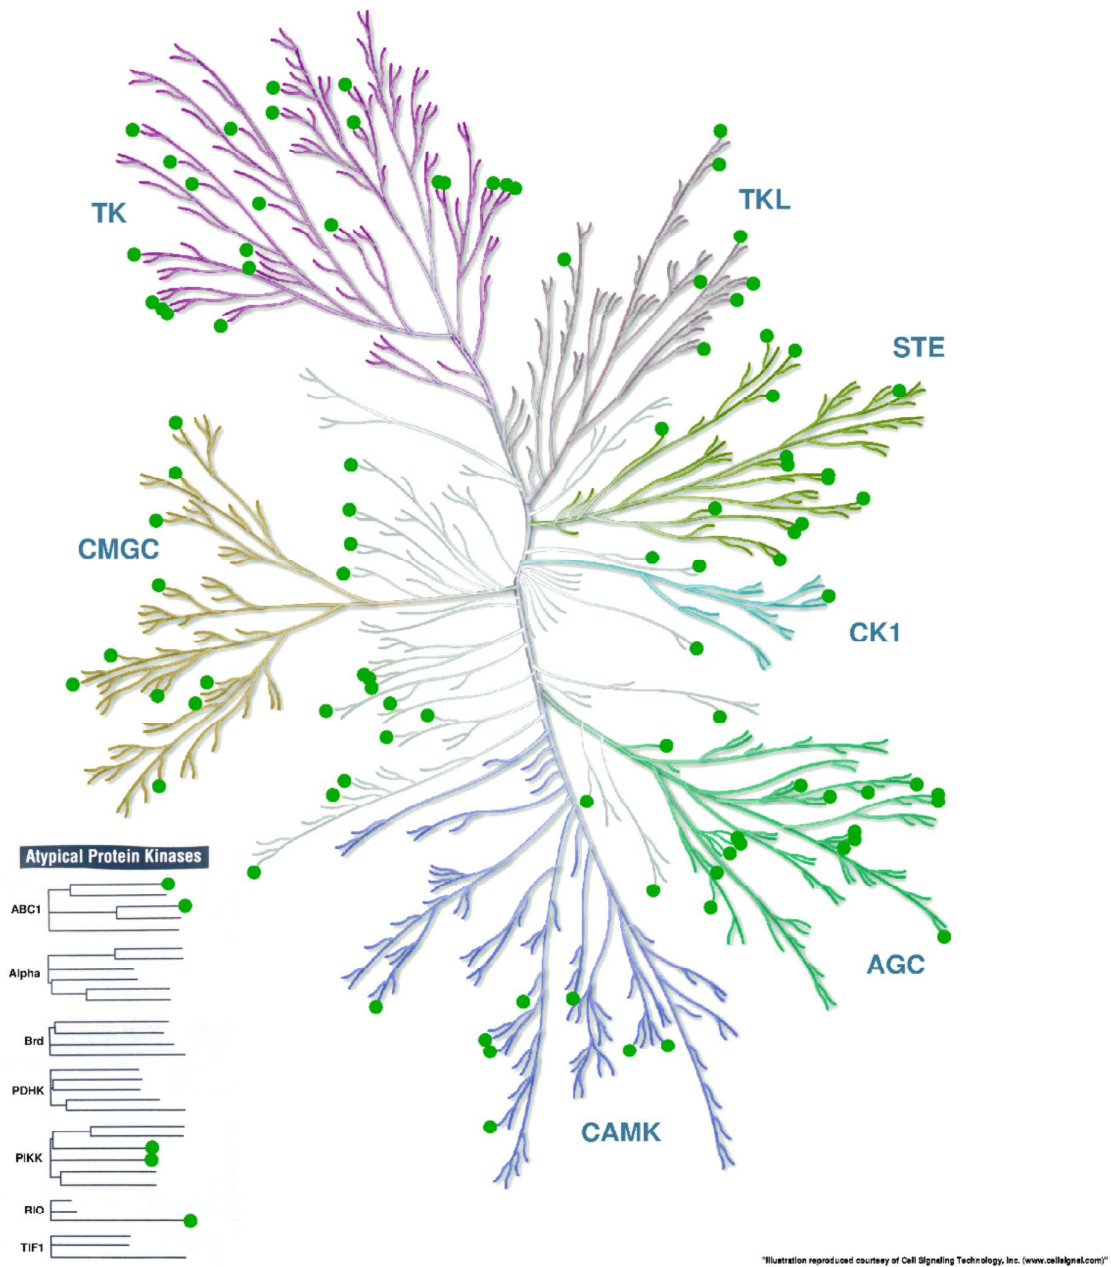

**Figure S7:** Comparison of protein kinases pulled down using CTx-0294885 (S9) kinase affinity beads. Illustration reproduced courtesy of Cell Signalling Technology, Inc. [www.cellsignal.com](http://www.cellsignal.com).

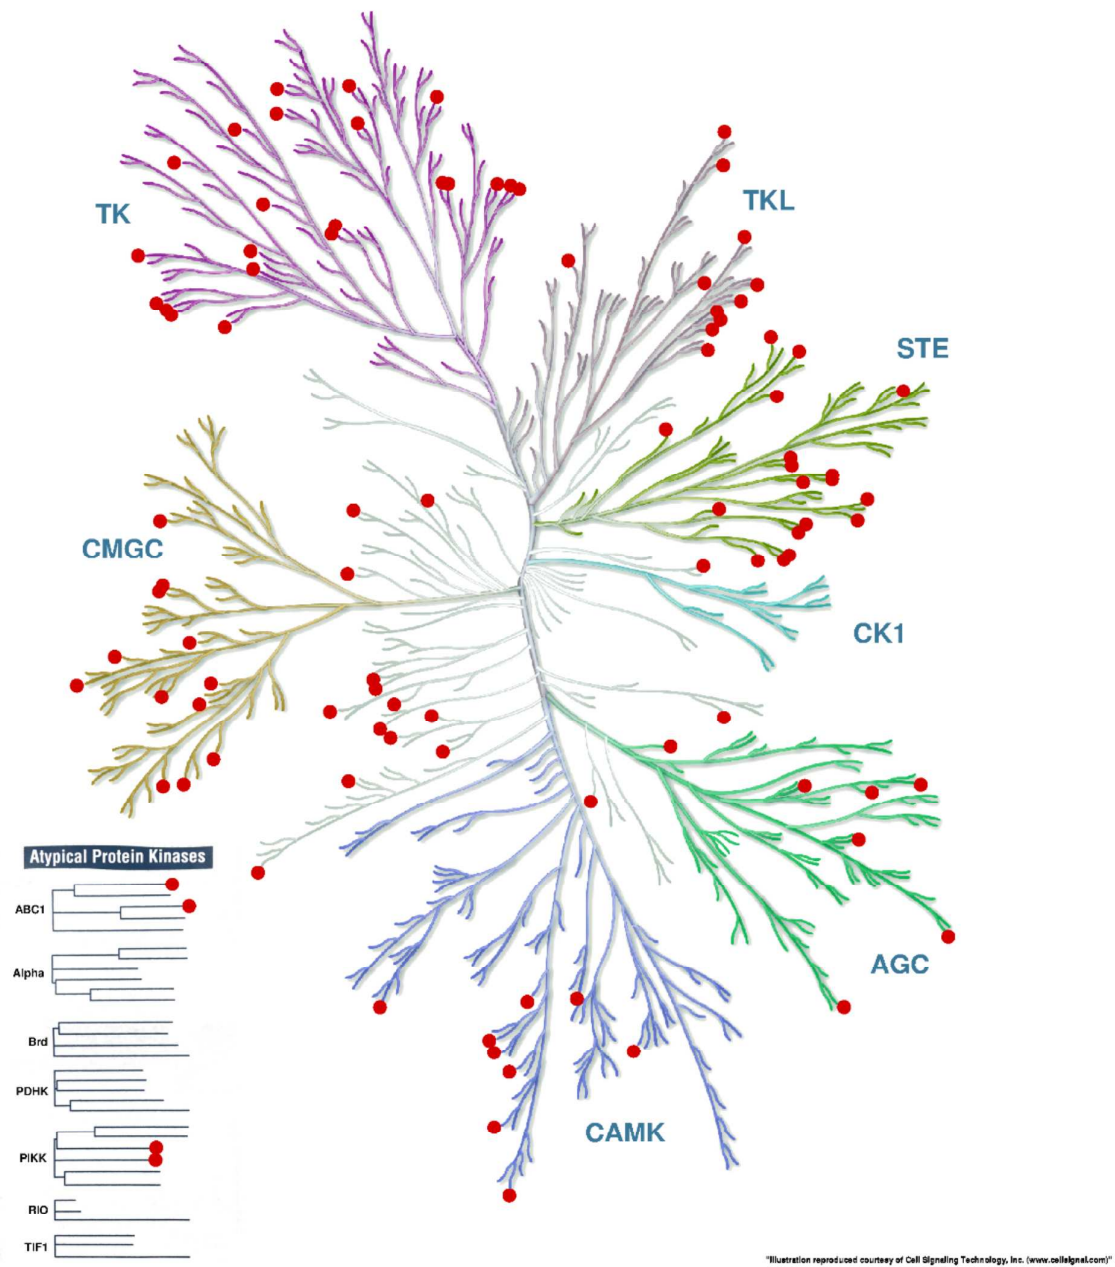

**Figure S8:** Comparison of protein kinases pulled down using Kuster Compound 19 (S10) kinase affinity beads. Illustration reproduced courtesy of Cell Signalling Technology, Inc. [www.cellsignal.com](http://www.cellsignal.com).

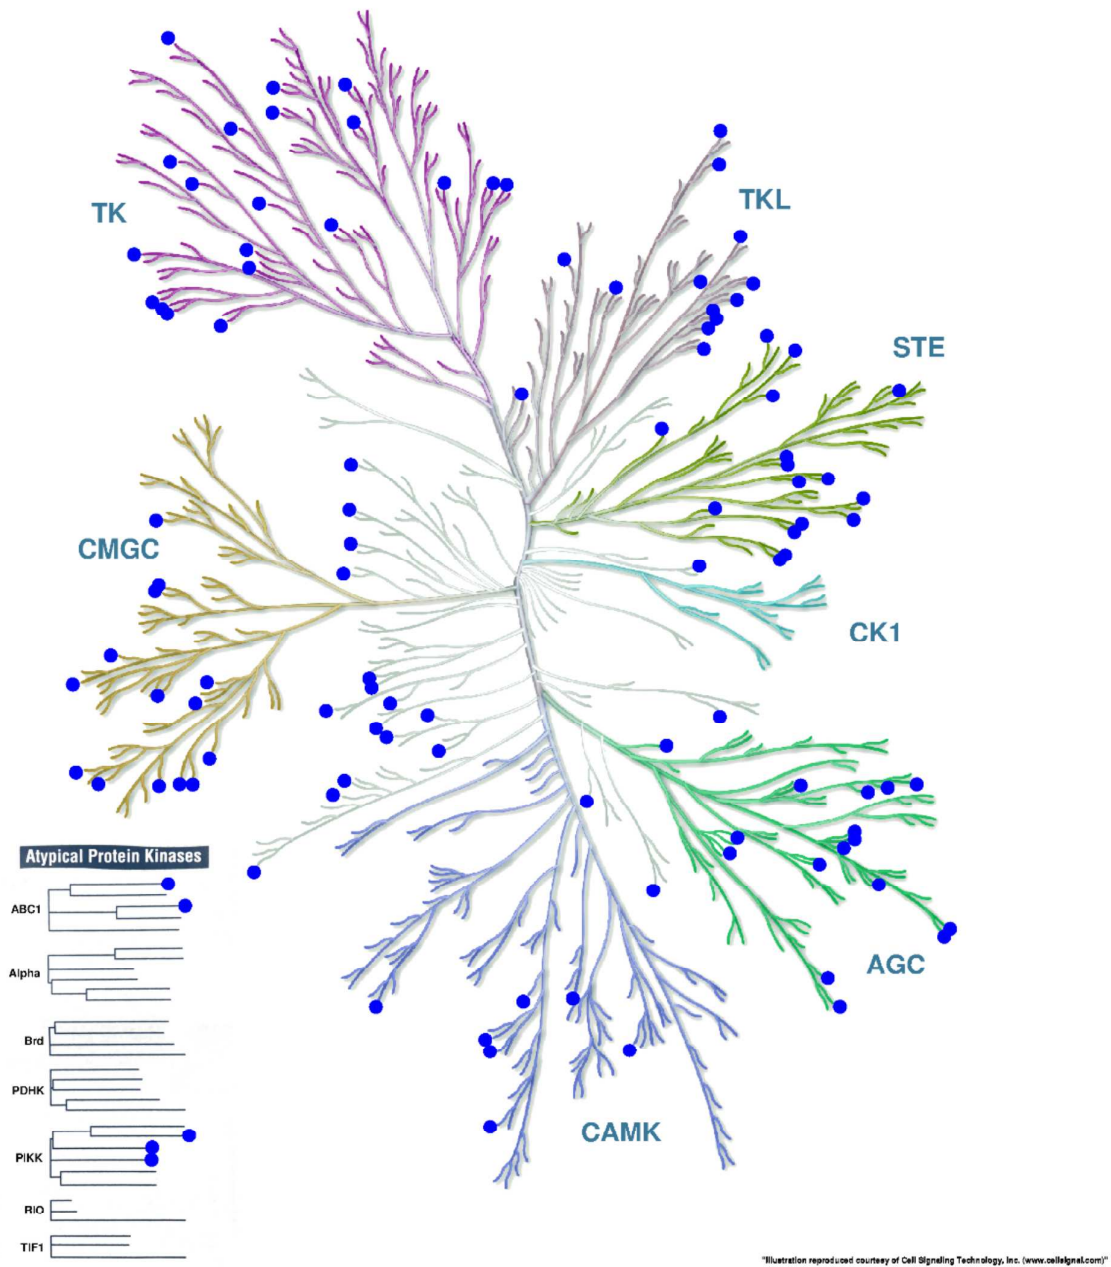

**Figure S9:** Comparison of protein kinases pulled down using FD5180 (S15) kinase affinity beads. Illustration reproduced courtesy of Cell Signalling Technology, Inc. [www.cellsignal.com](http://www.cellsignal.com).

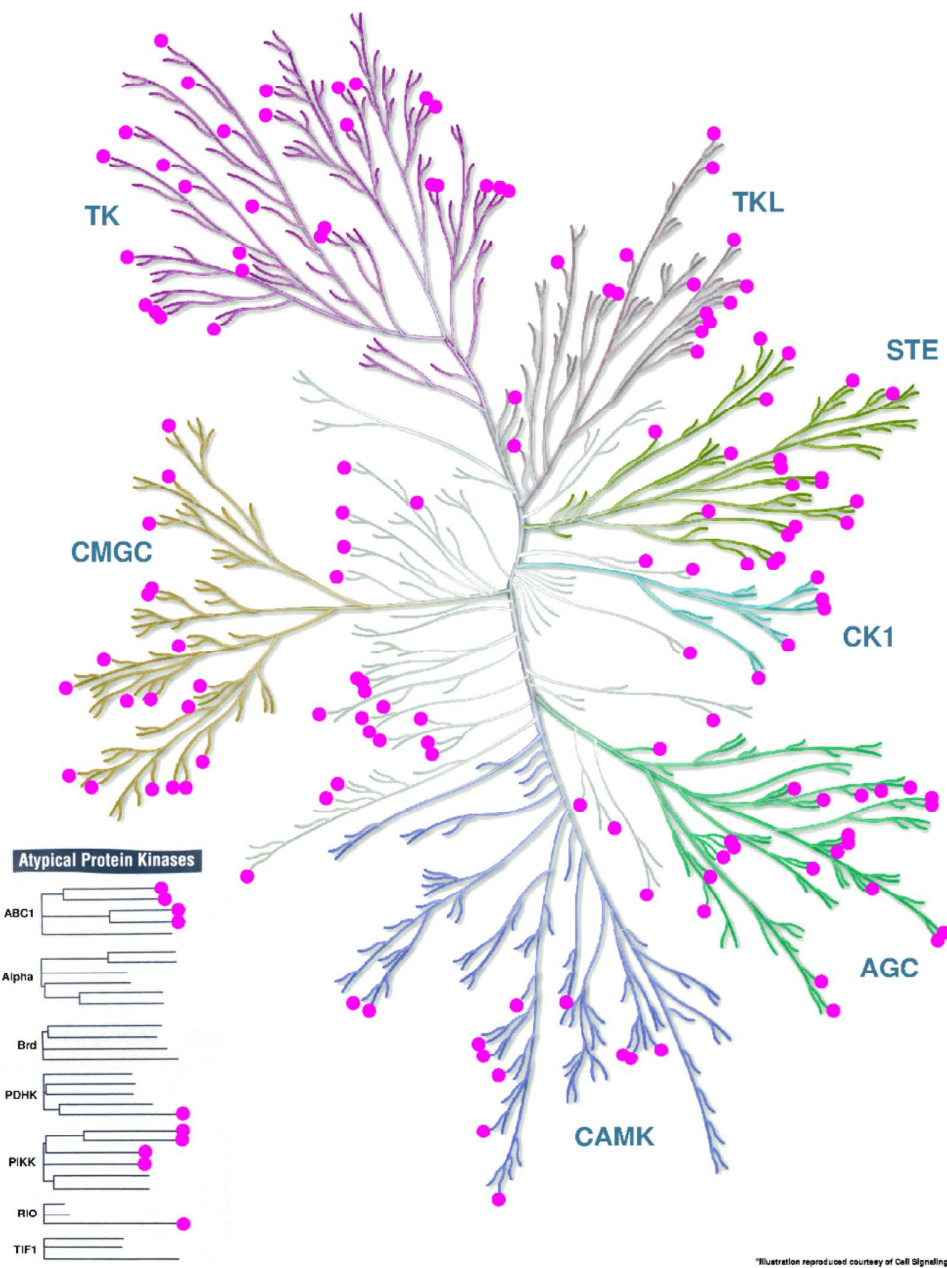

"Illustration reproduced courtesy of Cell Signaling Technology, Inc. ([www.cellsignal.com](http://www.cellsignal.com))"

**Figure S10:** Comparison of protein kinases pulled down using all kinase affinity beads from SF1-SF9. Illustration reproduced courtesy of Cell Signalling Technology, Inc. ([www.cellsignal.com](http://www.cellsignal.com)).

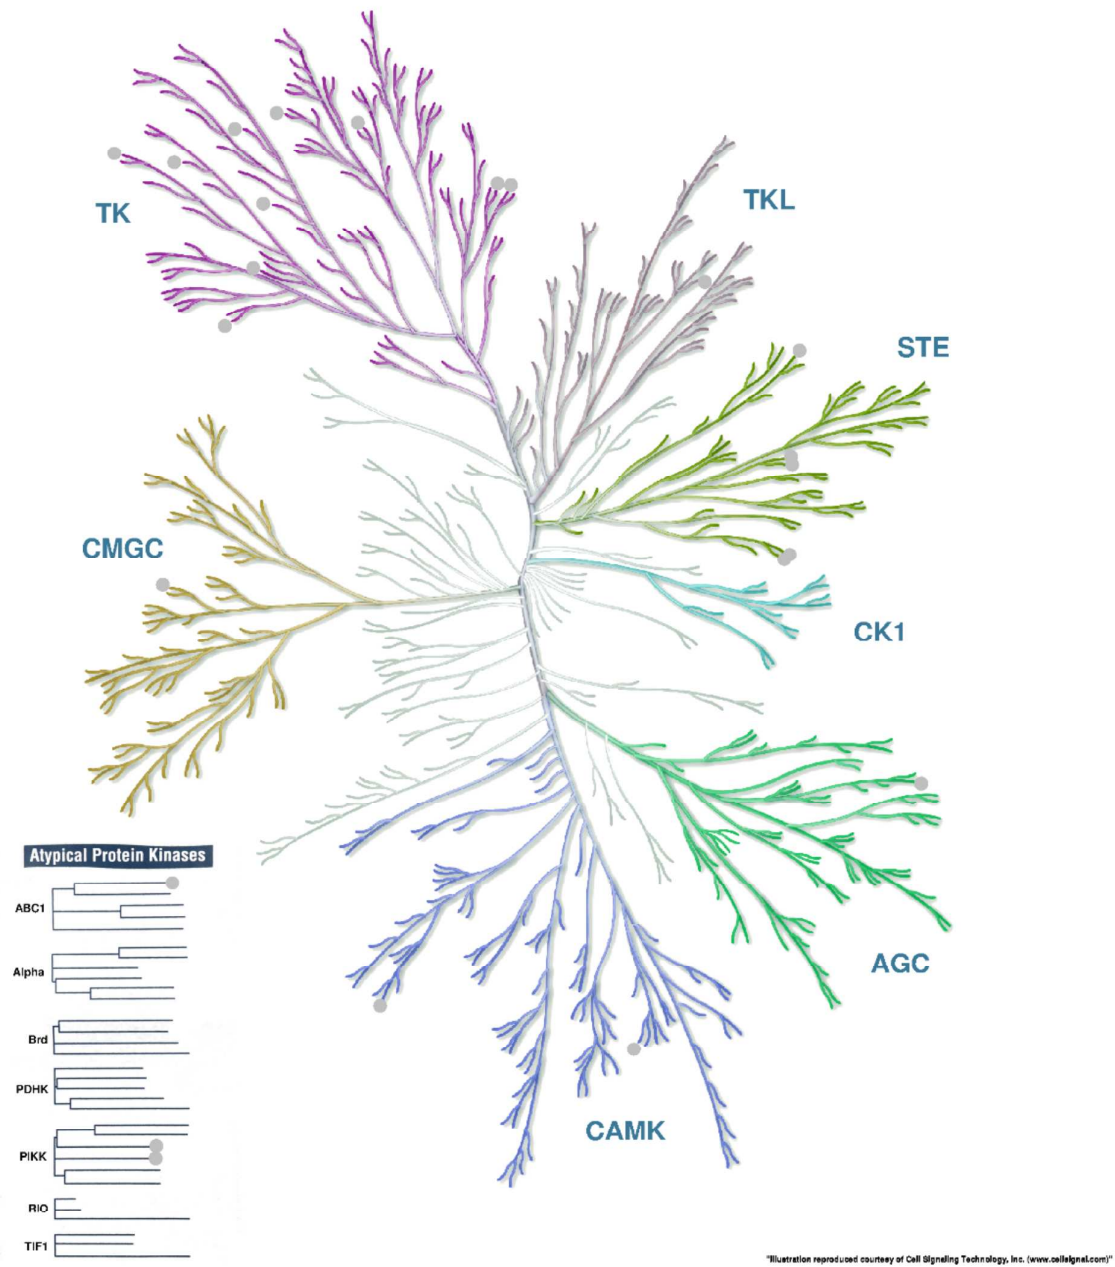

**Figure S11:** Comparison of protein kinases pulled down using blank (control) kinase affinity beads. Illustration reproduced courtesy of Cell Signalling Technology, Inc. [www.cellsignal.com](http://www.cellsignal.com).

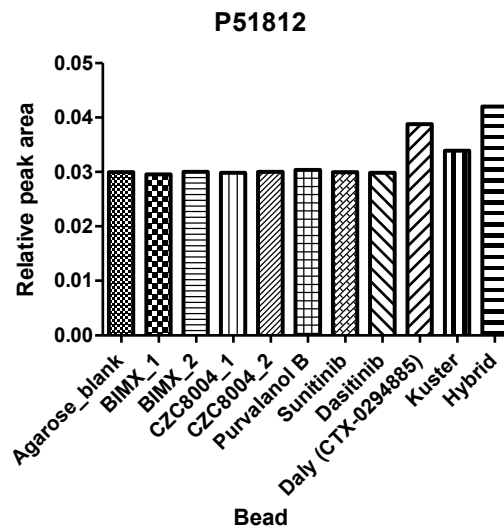

**Figure S12:** Bead binding profile for protein P51812. The relative amount of P51812 (Ribosomal protein S6 kinase alpha-3) bound to each bead tested in the study.

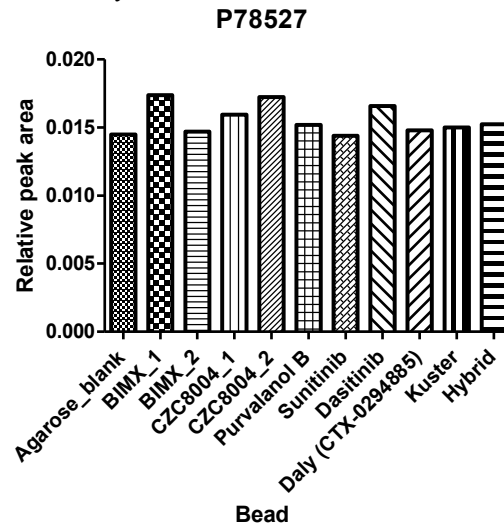

**Figure S13:** Bead binding profile for protein P78527. The relative amount of P78527 (DNA-dependent protein kinase catalytic subunit) bound to each bead tested in the study.

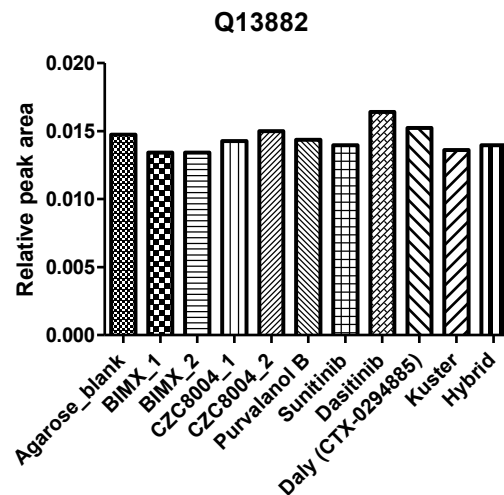

**Figure S14:** Bead binding profile for protein Q13882. The relative amount of Q13882 (Protein-tyrosine kinase 6) bound to each bead tested in the study.

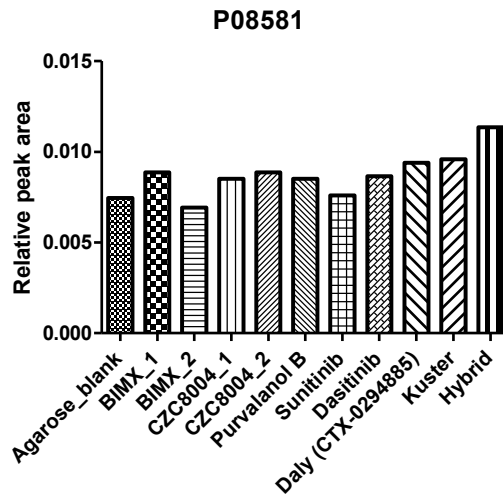

**Figure S15:** Bead binding profile for protein P08581. The relative amount of P08581 (Hepatocyte growth factor receptor) bound to each bead tested in the study.

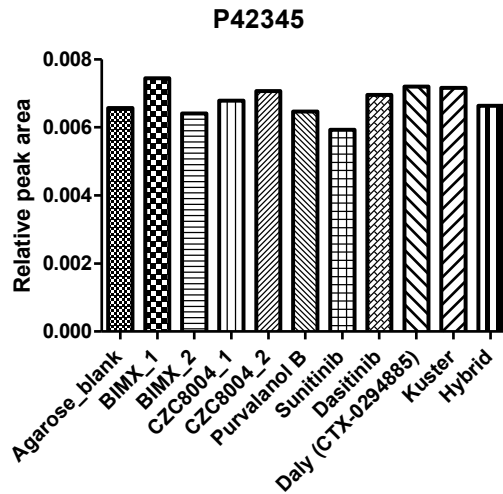

**Figure S16:** Bead binding profile for protein P42345. The relative amount of P42345 (Serine/threonine-protein kinase mTOR) bound to each bead tested in the study.

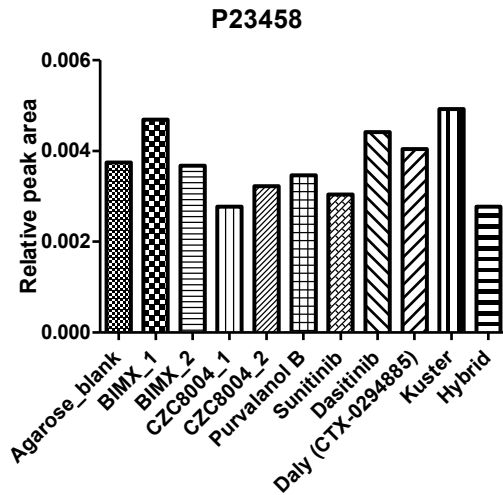

**Figure S17:** Bead binding profile for protein P23458. The relative amount of P23458 (Tyrosine-protein kinase JAK1) bound to each bead tested in the study.



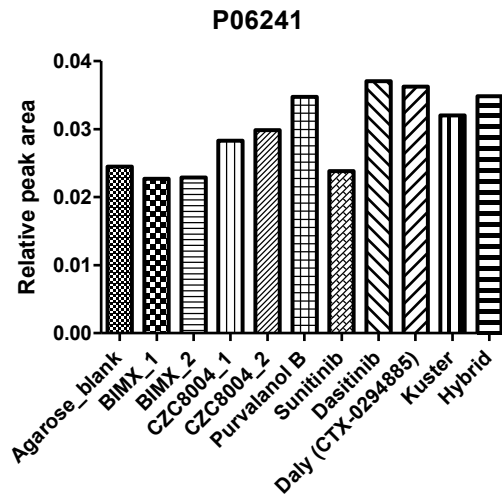

**Figure S18:** Bead binding profile for protein P06241. The relative amount of P06241 (Tyrosine-protein kinase Fyn) bound to each bead tested in the study.

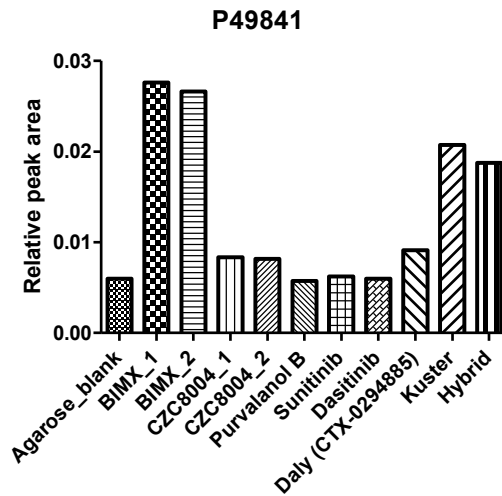

**Figure S19:** Bead binding profile for protein P49841. The relative amount of P49841 (Glycogen synthase kinase-3 beta) bound to each bead tested in the study.

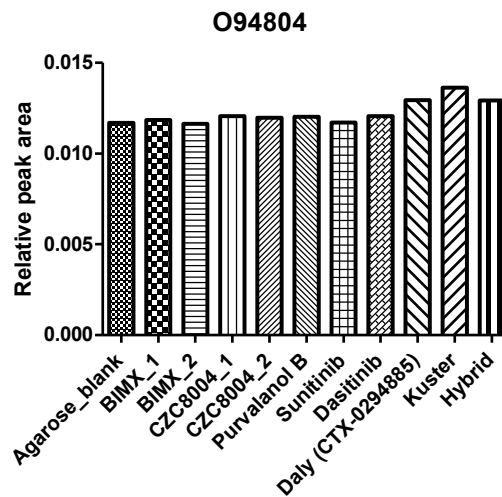

**Figure S20:** Bead binding profile for protein O94804. The relative amount of O94804 (Serine/threonine-protein kinase 10) bound to each bead tested in the study.

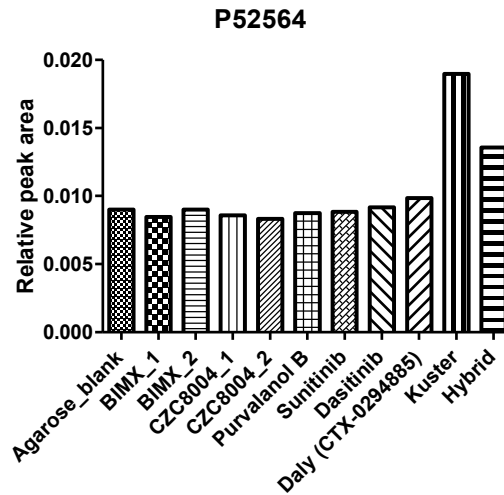

**Figure S21:** Bead binding profile for protein P52564. The relative amount of P52564 (Dual specificity mitogen-activated protein kinase 6) bound to each bead tested in the study.

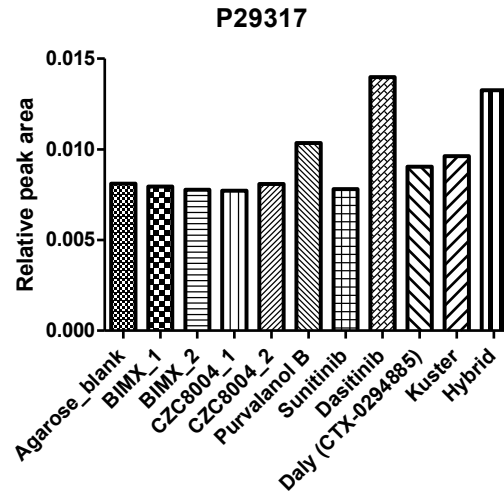

**Figure S22:** Bead binding profile for protein P29317. The relative amount of P29317 (Ephrin type-A receptor 2) bound to each bead tested in the study.

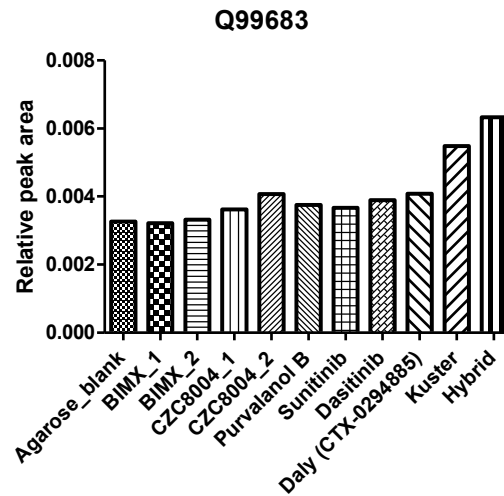

**Figure S23:** Bead binding profile for protein Q99683. The relative amount of Q99683 (Mitogen-activated protein kinase kinase 5) bound to each bead tested in the study.

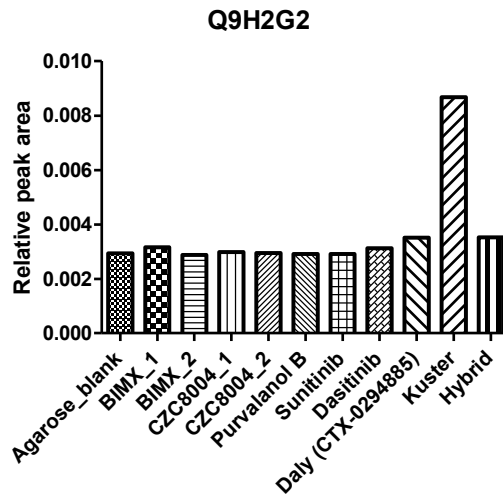

**Figure S24:** Bead binding profile for protein Q9H2G2. The relative amount of Q9H2G2 (STE20-like serine/threonine-protein kinase) bound to each bead tested in the study.

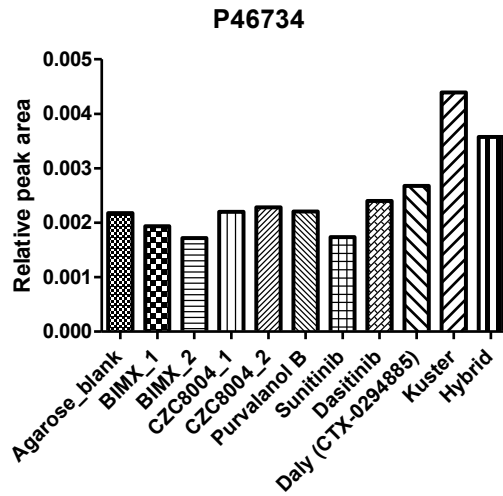

**Figure S25:** Bead binding profile for protein P46734. The relative amount of P46734 (Dual specificity mitogen-activated protein kinase 3) bound to each bead tested in the study.

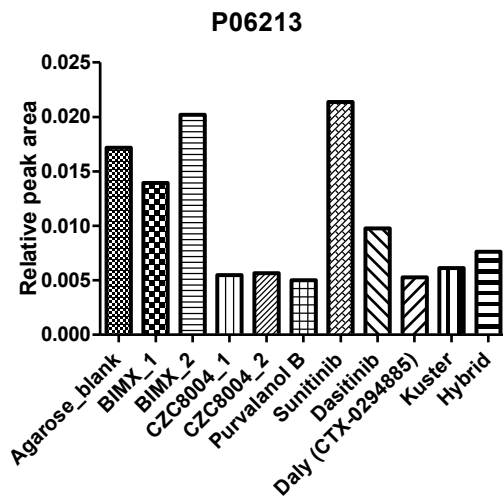

**Figure S26:** Bead binding profile for protein P06213. The relative amount of P06213 (Insulin receptor) bound to each bead tested in the study.

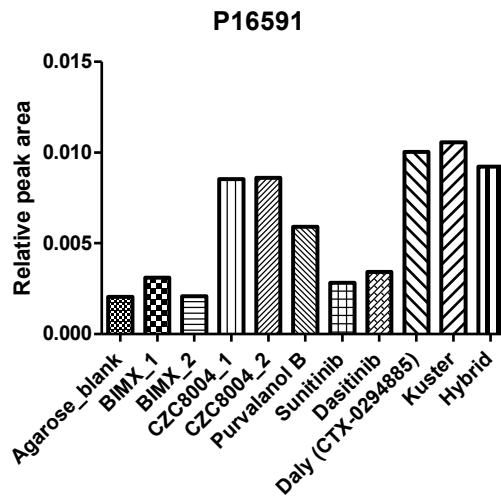

**Figure S27:** Bead binding profile for protein P16591. The relative amount of P16591 (Tyrosine-protein kinase Fer) bound to each bead tested in the study.

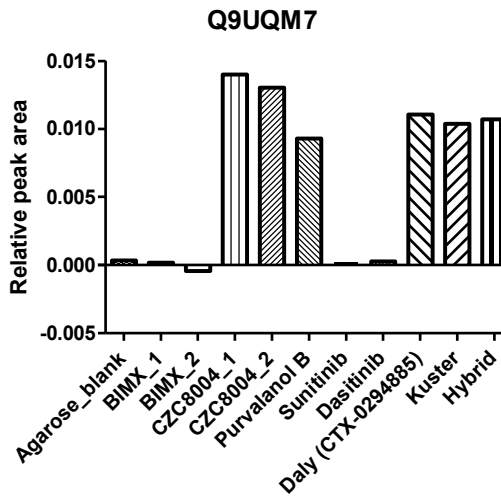

**Figure S28:** Bead binding profile for protein Q9UQM7. The relative amount of Q9UQM7 (Calcium/calmodulin-dependent protein kinase type II subunit alpha) bound to each bead tested in the study.

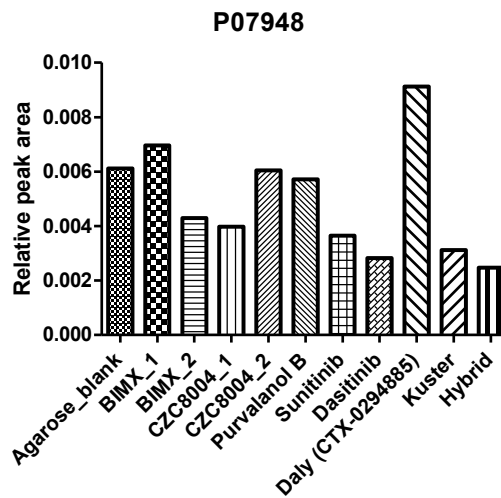

**Figure S29:** Bead binding profile for protein P07948. The relative amount of P07948 (Tyrosine-protein kinase Lyn) bound to each bead tested in the study.

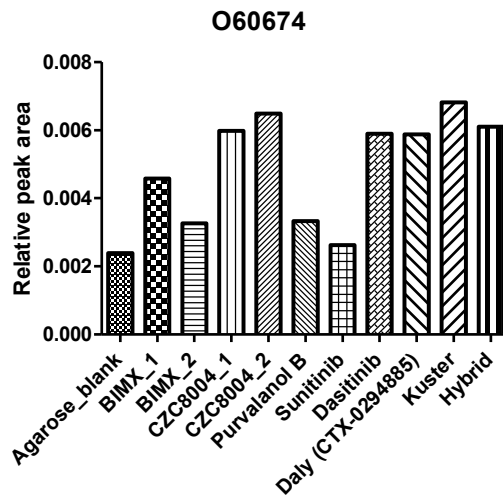

**Figure S30:** Bead binding profile for protein O60674. The relative amount of O60674 (Tyrosine-protein kinase JAK2) bound to each bead tested in the study.

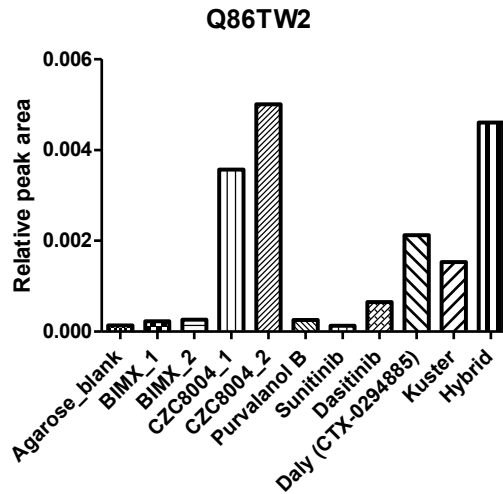

**Figure S31:** Bead binding profile for protein Q86TW2. The relative amount of Q86TW2 (Uncharacterised aarF domain-containing protein kinase 1) bound to each bead tested in the study.

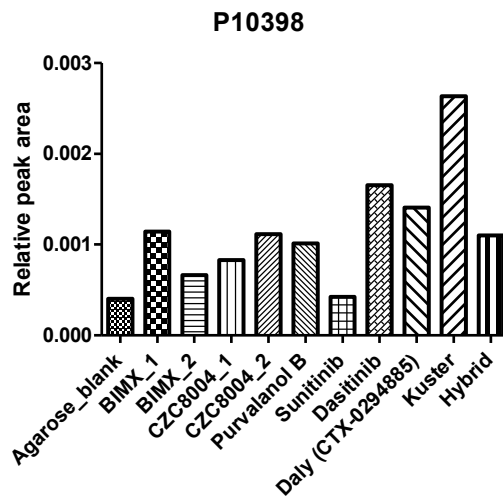

**Figure S32:** Bead binding profile for protein P10398. The relative amount of P10398 (Serine/threonine-protein kinase A-Raf) bound to each bead tested in the study.

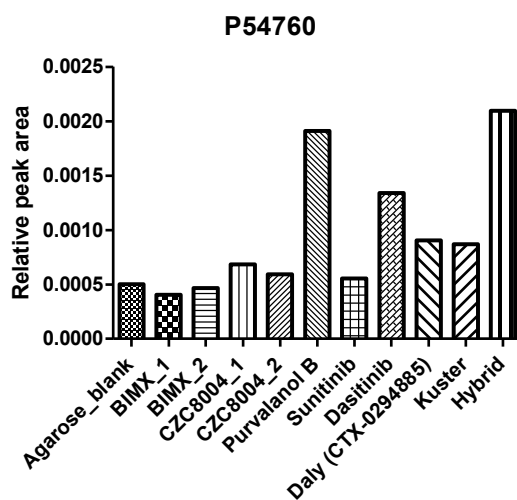

**Figure S33:** Bead binding profile for protein P54760. The relative amount of P54760 (Ephrin type-B receptor 4) bound to each bead tested in the study.

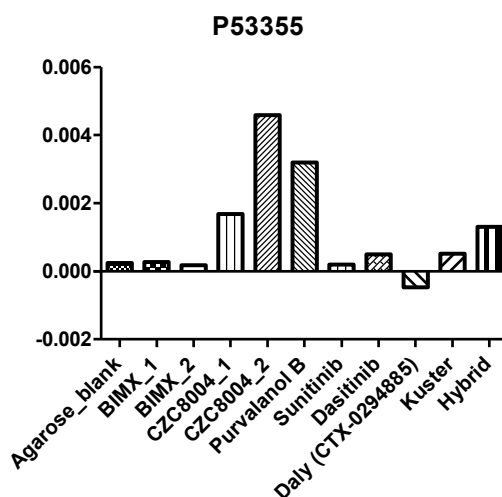

**Figure S34:** Bead binding profile for protein P53355. The relative amount of P53355 (Death-associated protein kinase 1) bound to each bead tested in the study.

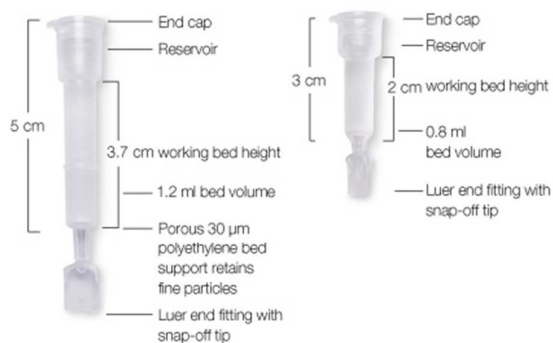

**Figure S35.** Mini Bio-Spin Chromatography Columns for coupling reactions

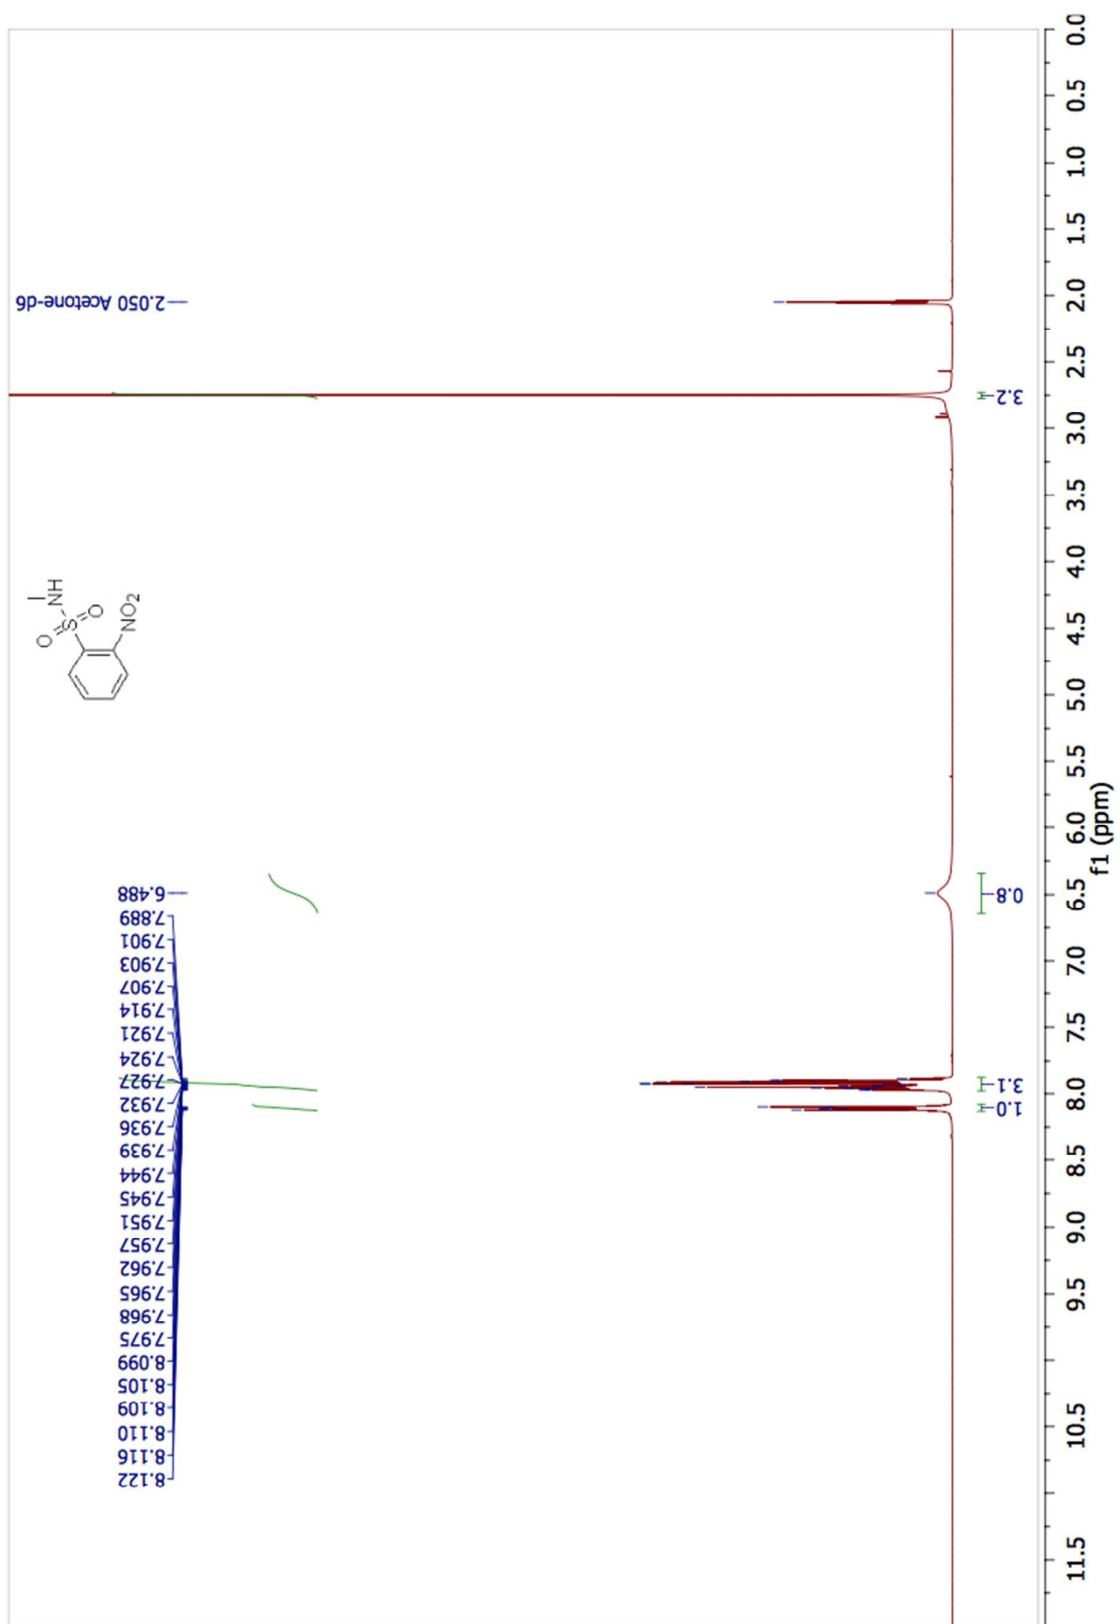

Figure S36: <sup>1</sup>H NMR spectrum of 12.

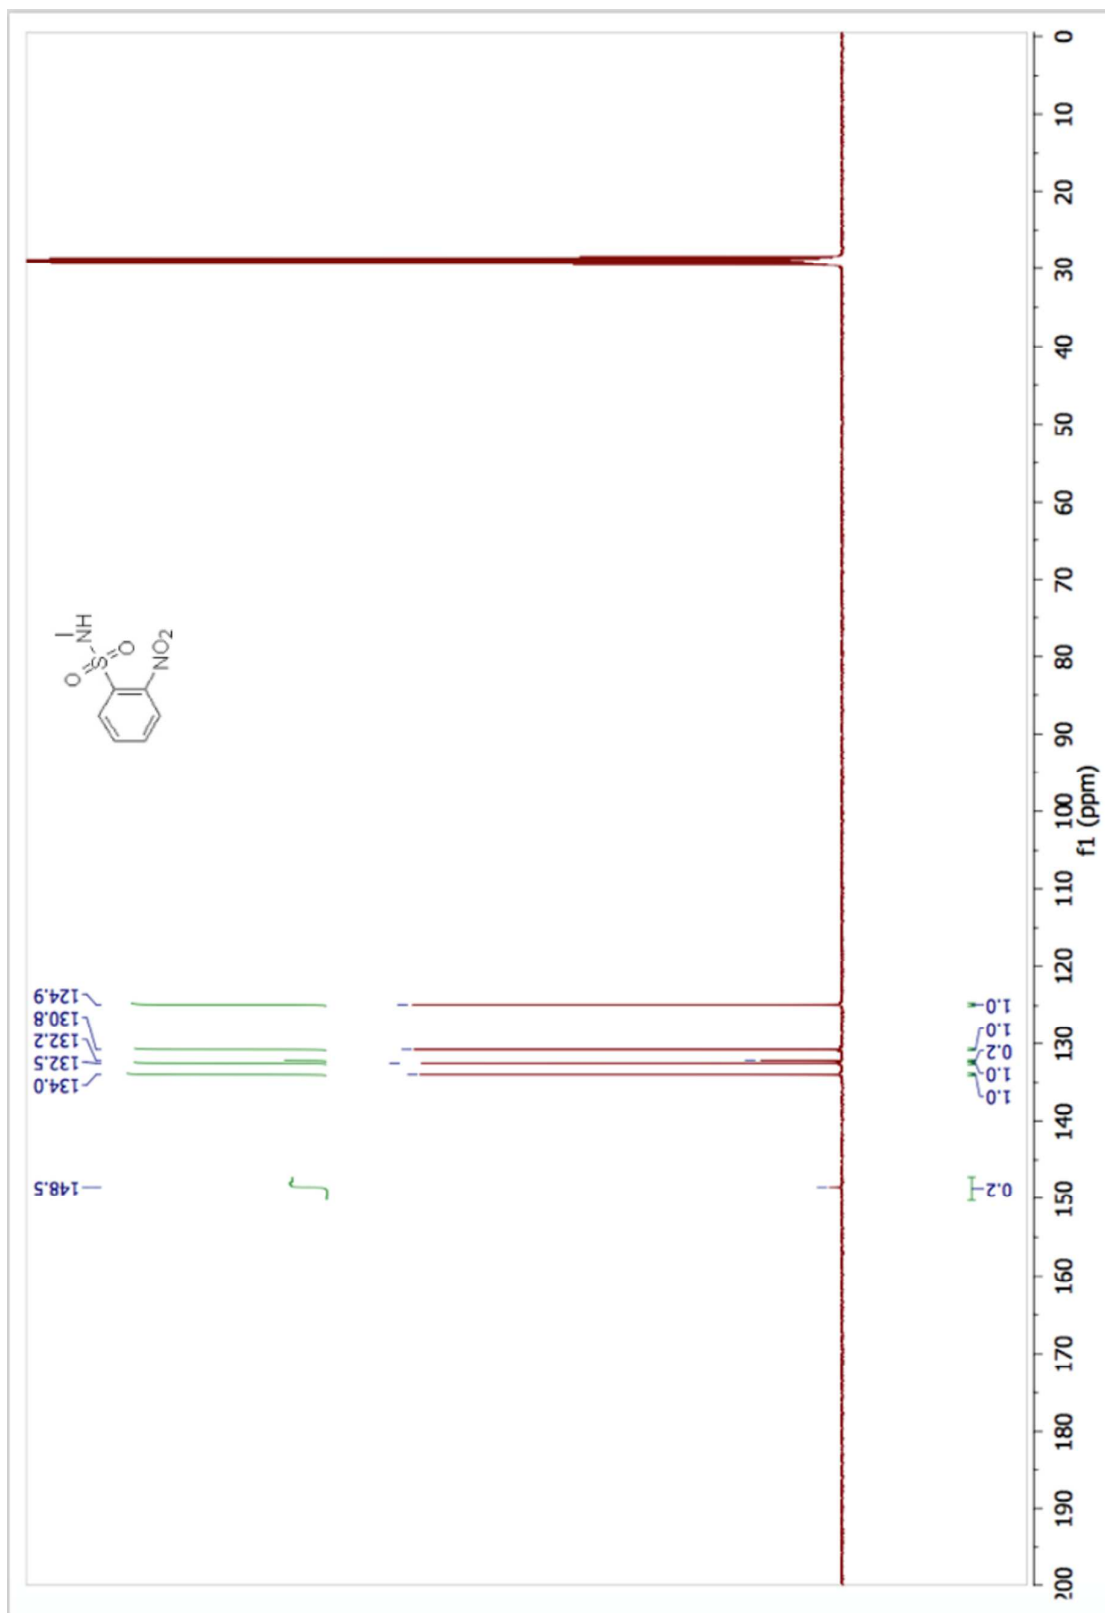

Figure S37:  $^{13}\text{C}$  NMR spectrum of 12.



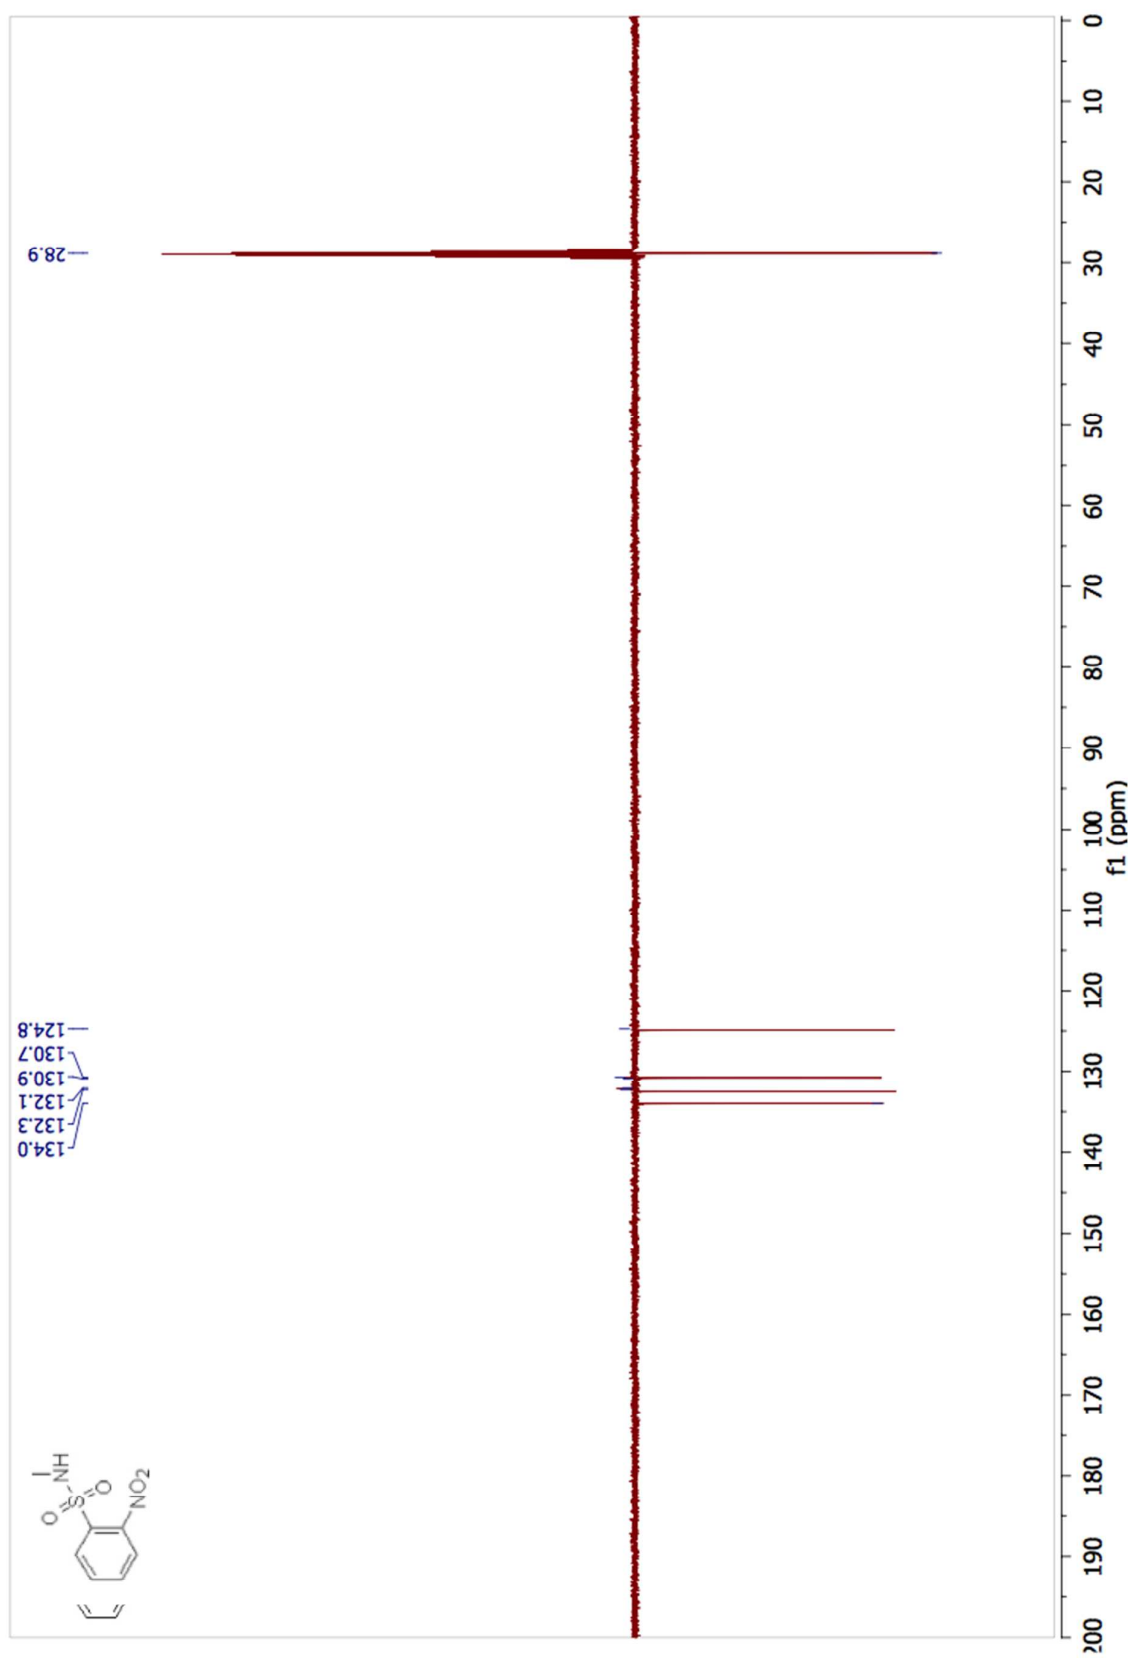

Figure S38: DEPT NMR spectrum of 12.

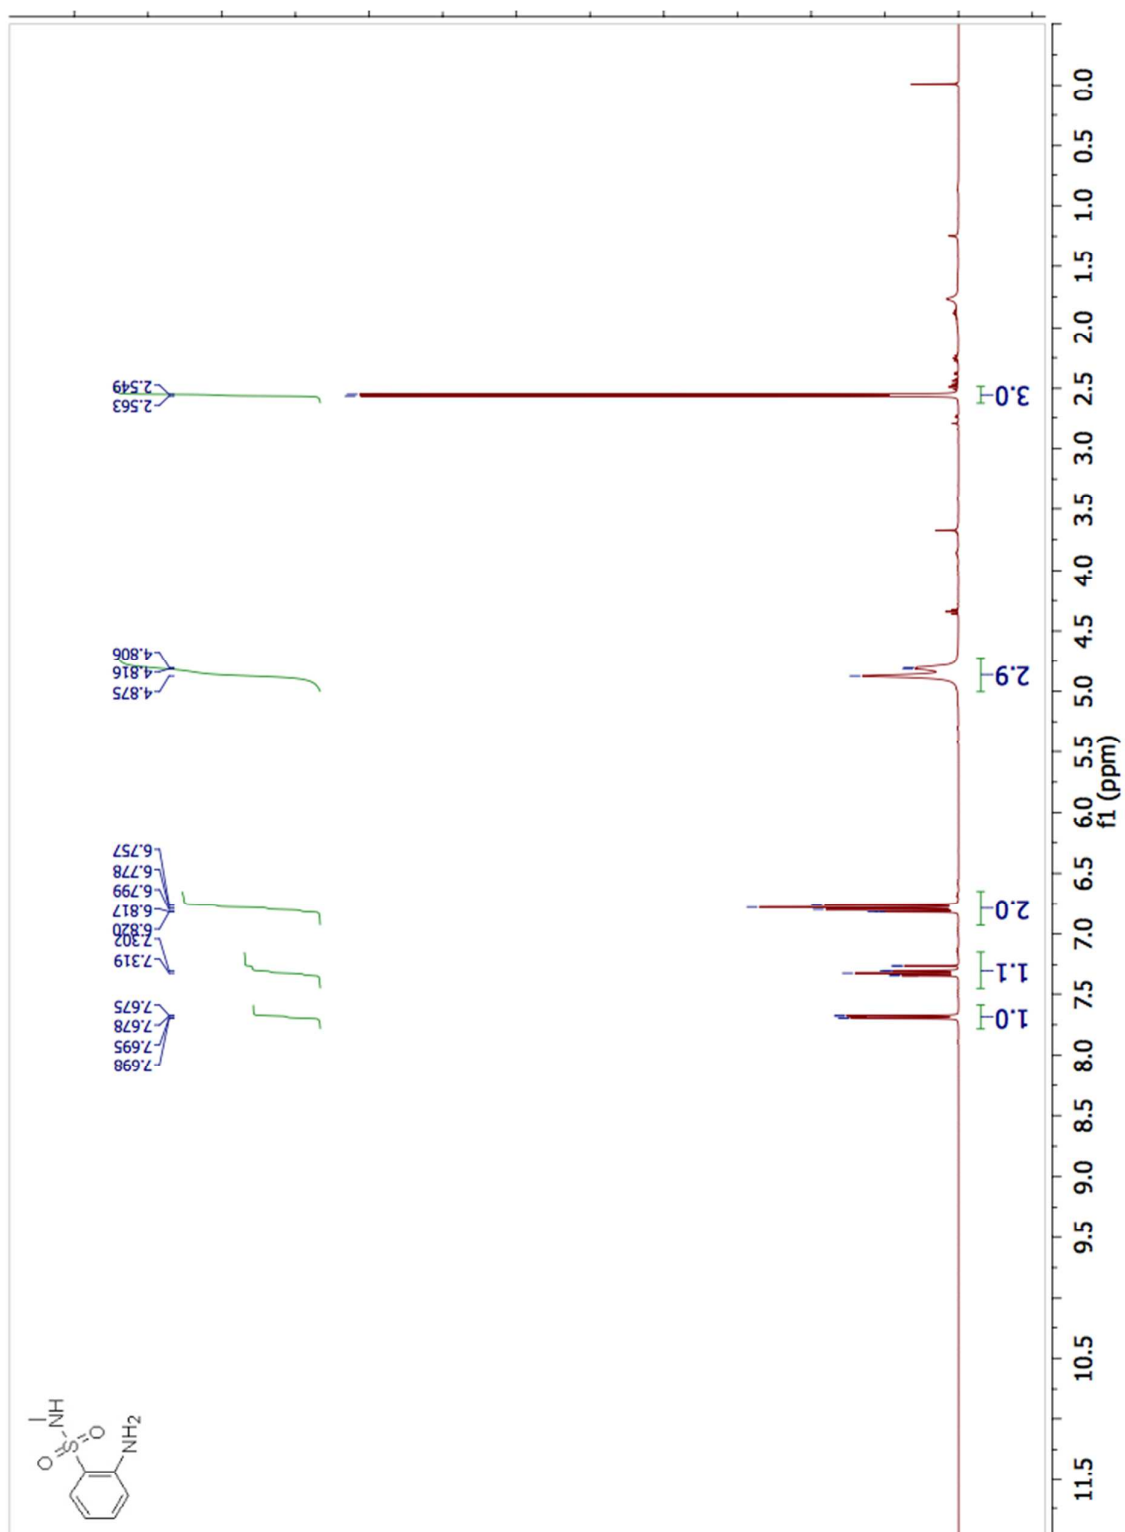

Figure S39: <sup>1</sup>H NMR spectrum of 13.

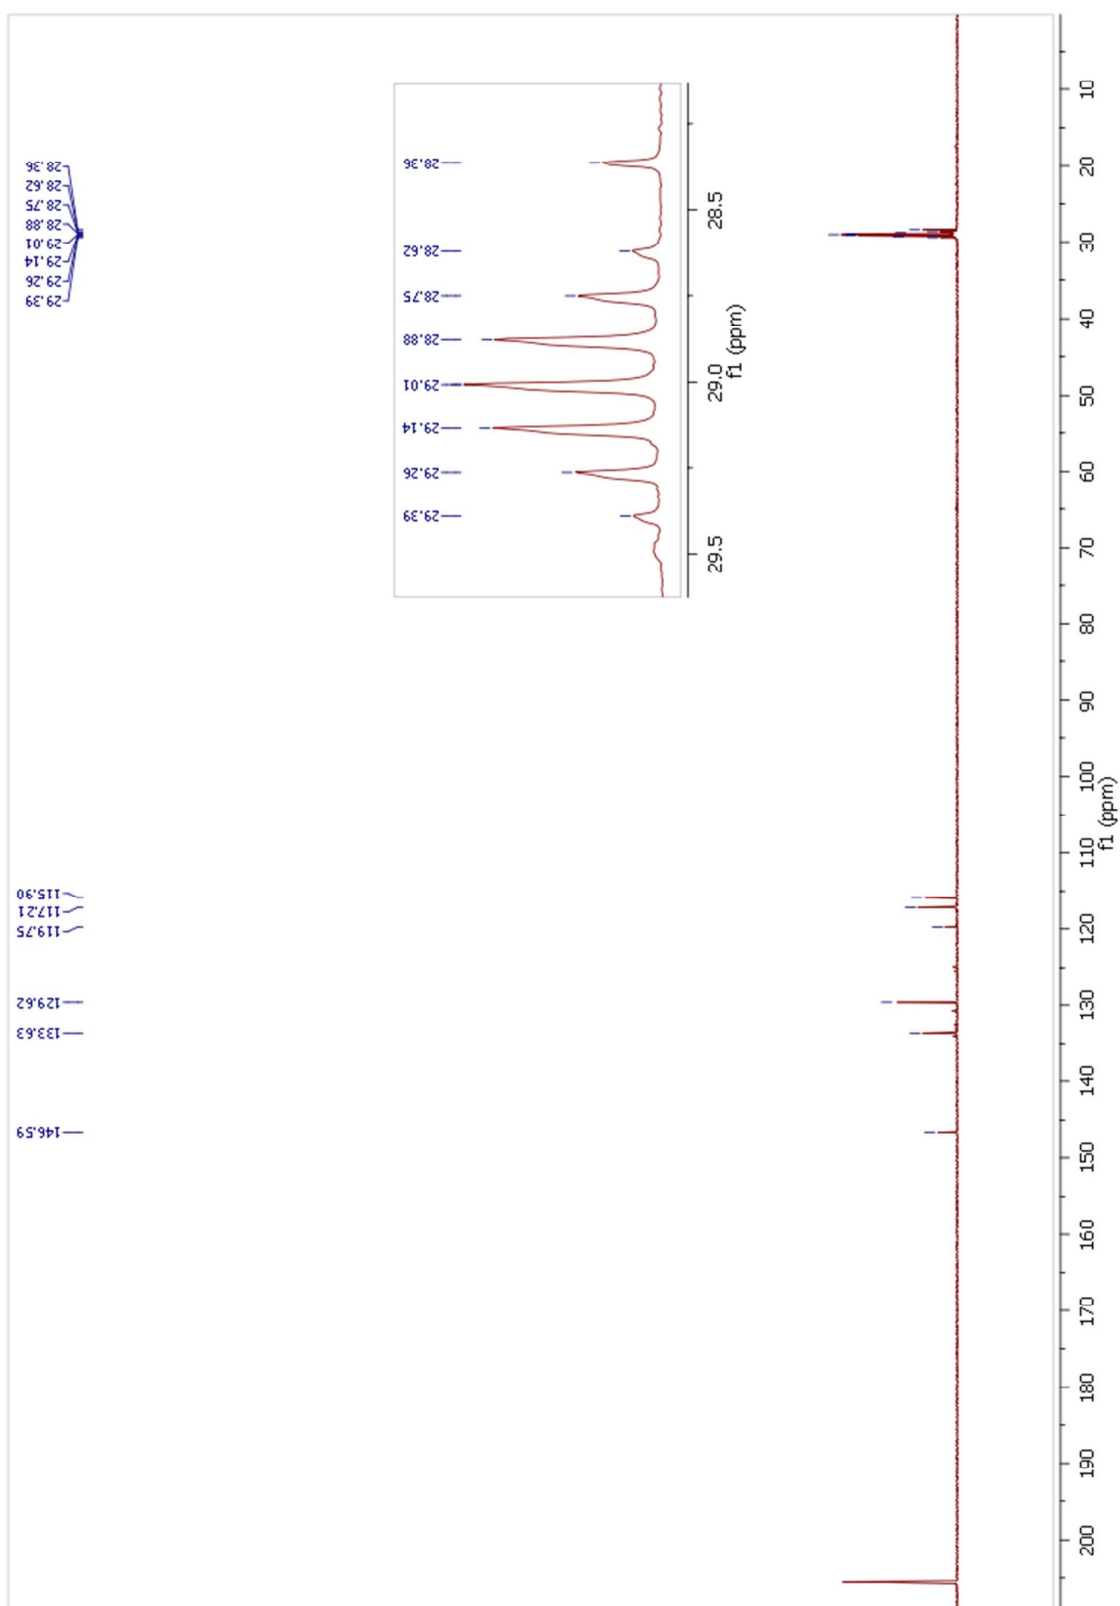

Figure S40:  $^{13}\text{C}$  NMR spectrum of 13.

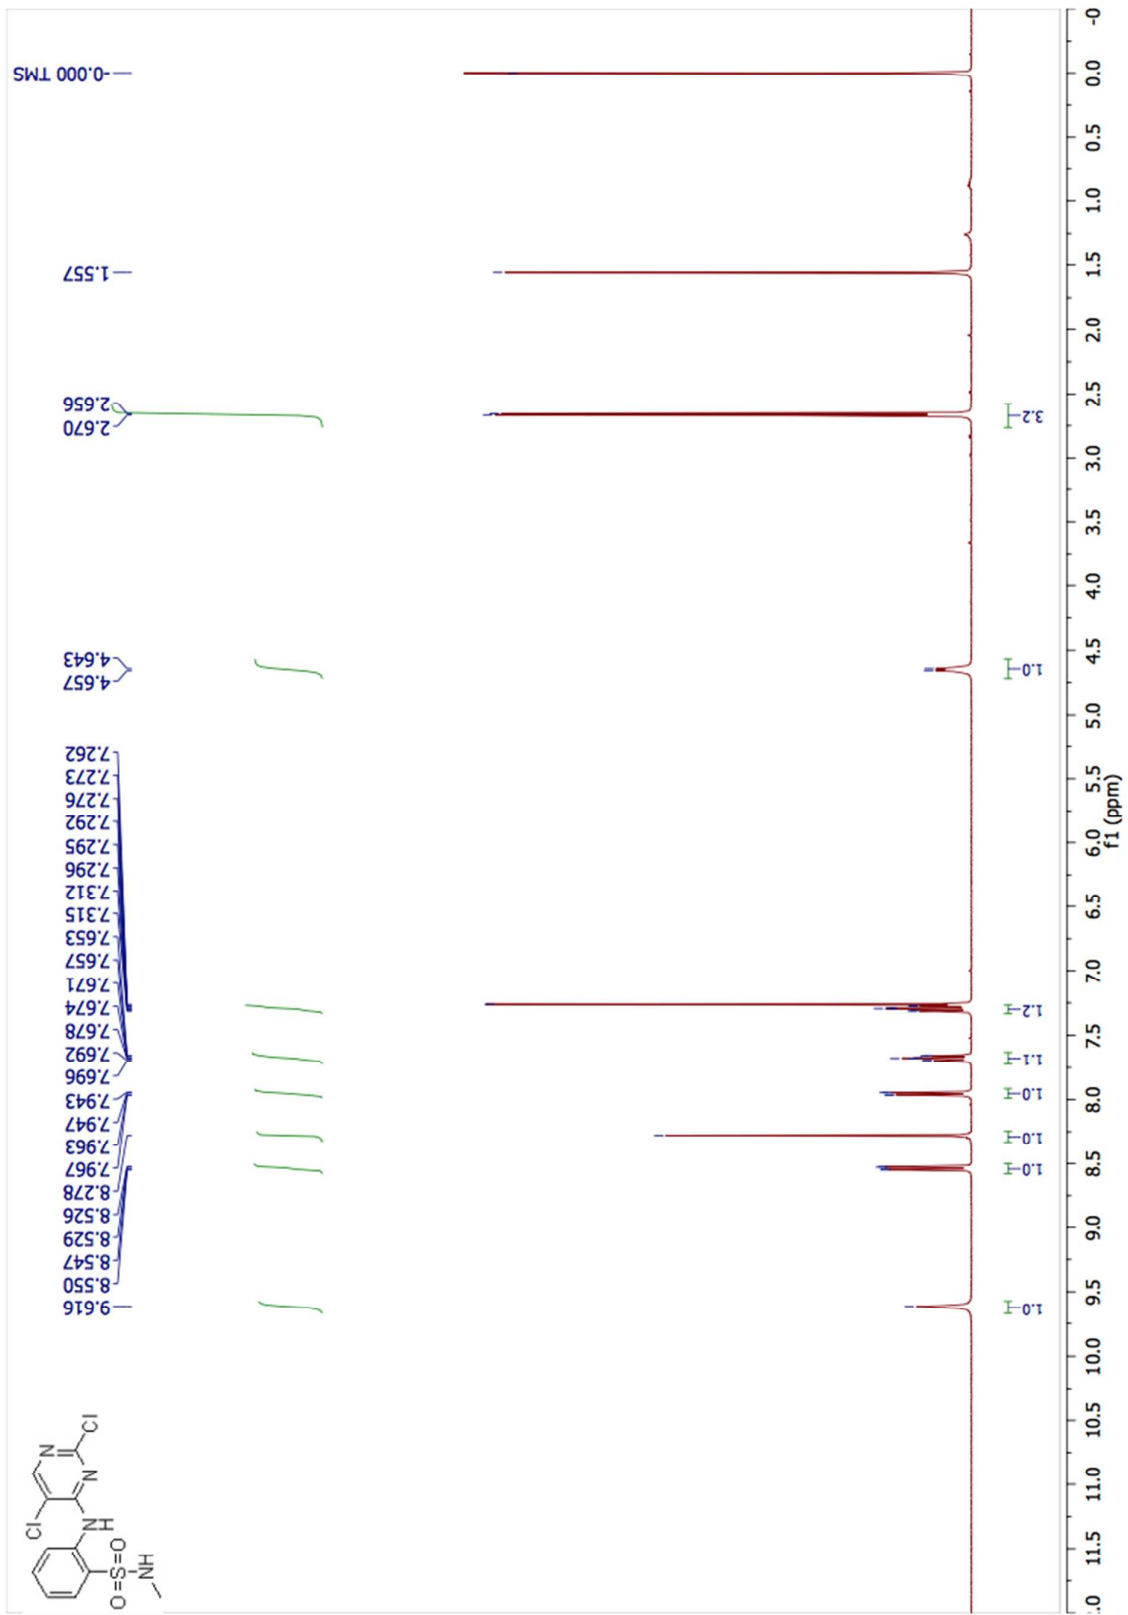

Figure S41: <sup>1</sup>H NMR spectrum of 14.

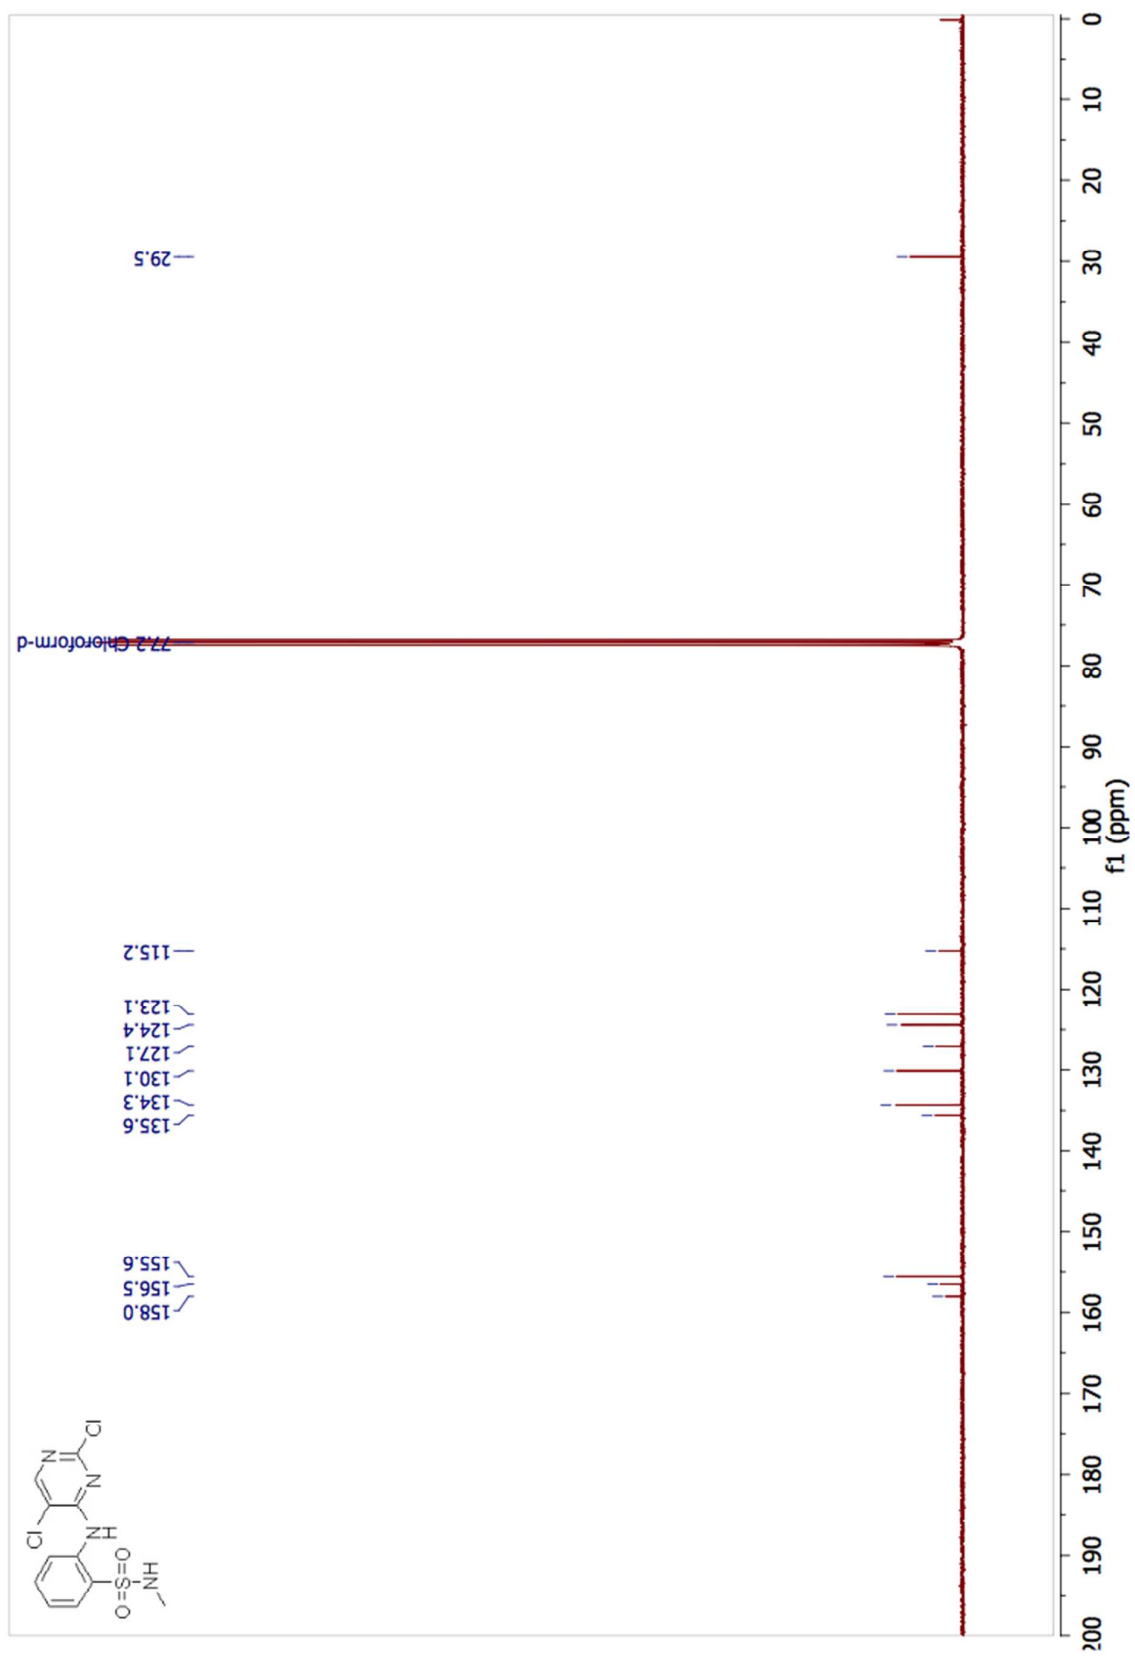

Figure S42:  $^{13}\text{C}$  NMR spectrum of 14.

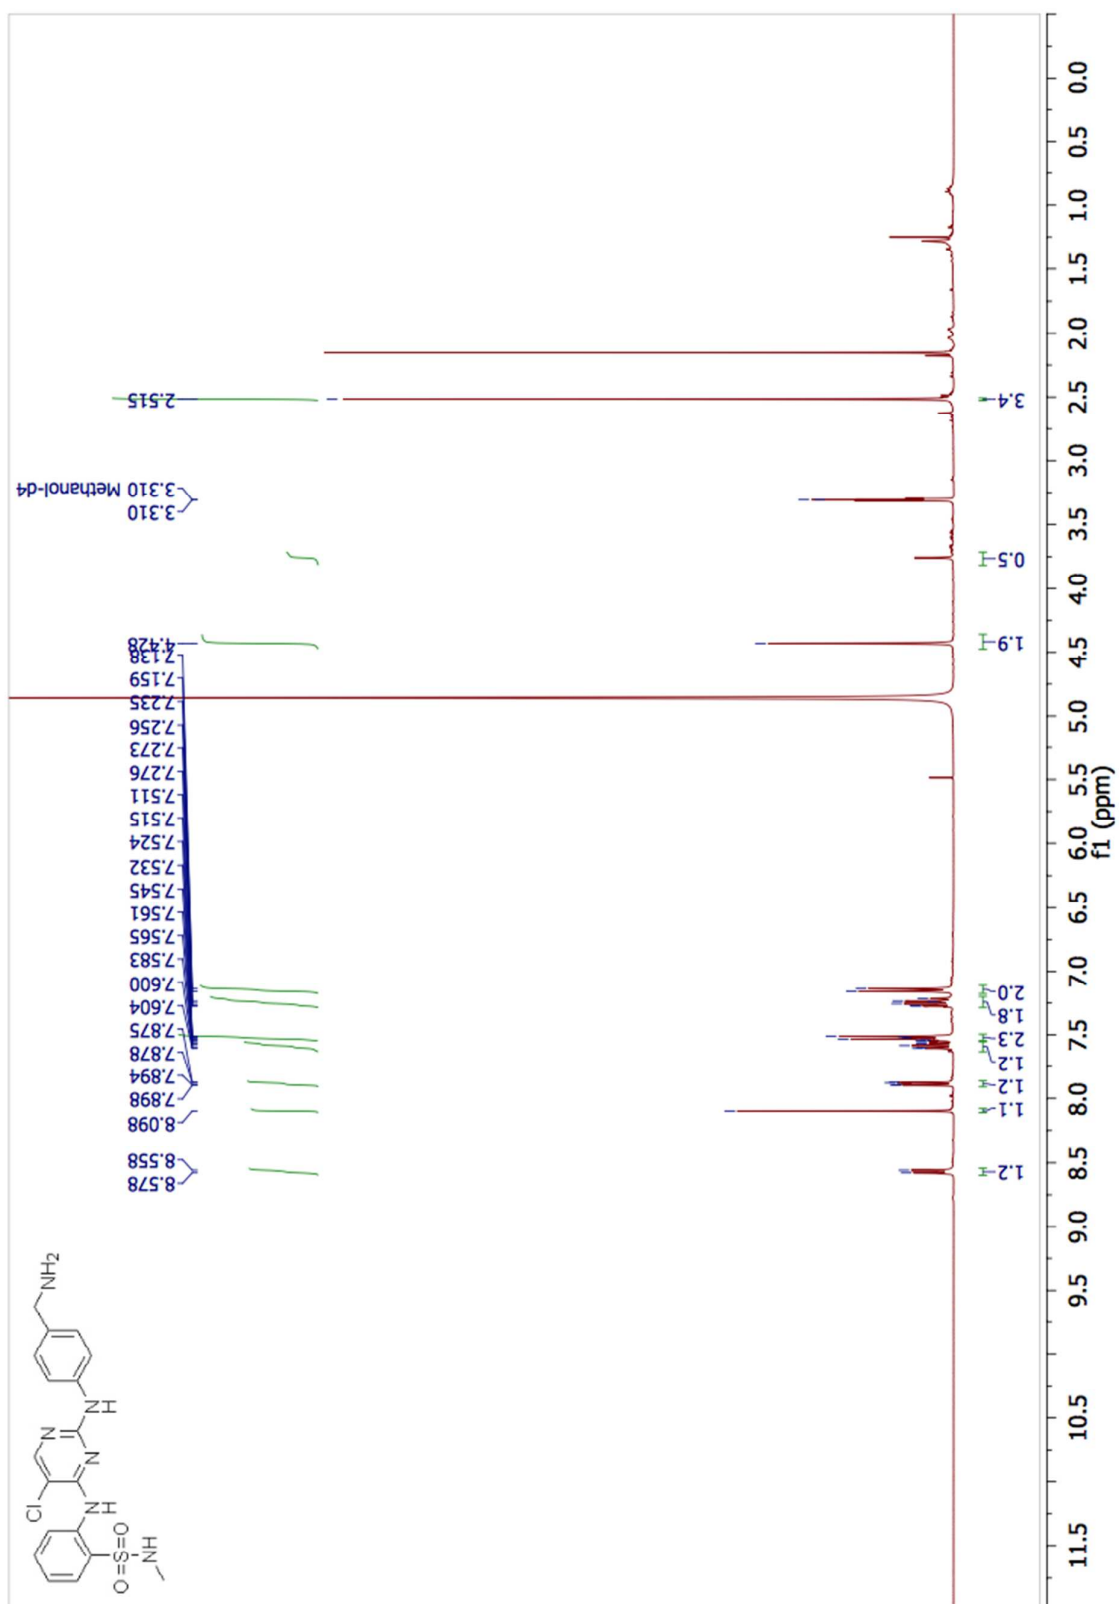

Figure S43: <sup>1</sup>H NMR spectrum of 10.

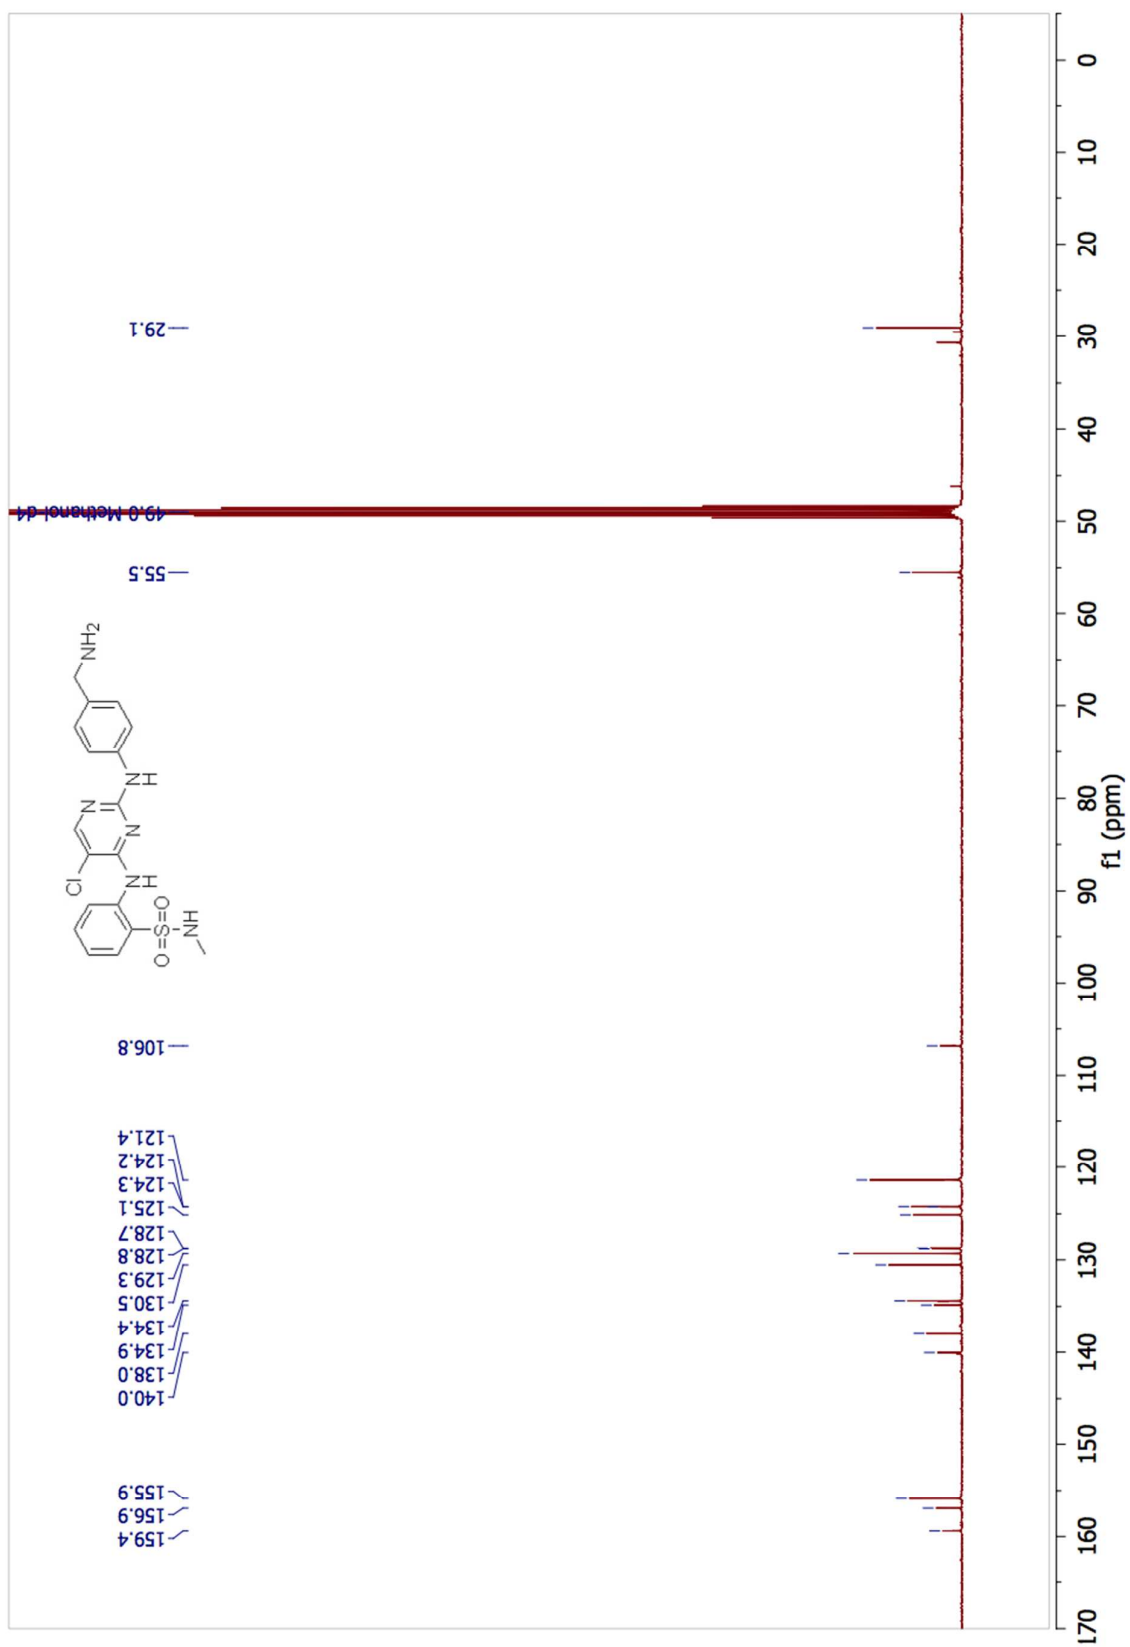

Figure S44: <sup>13</sup>C NMR spectrum of 10.

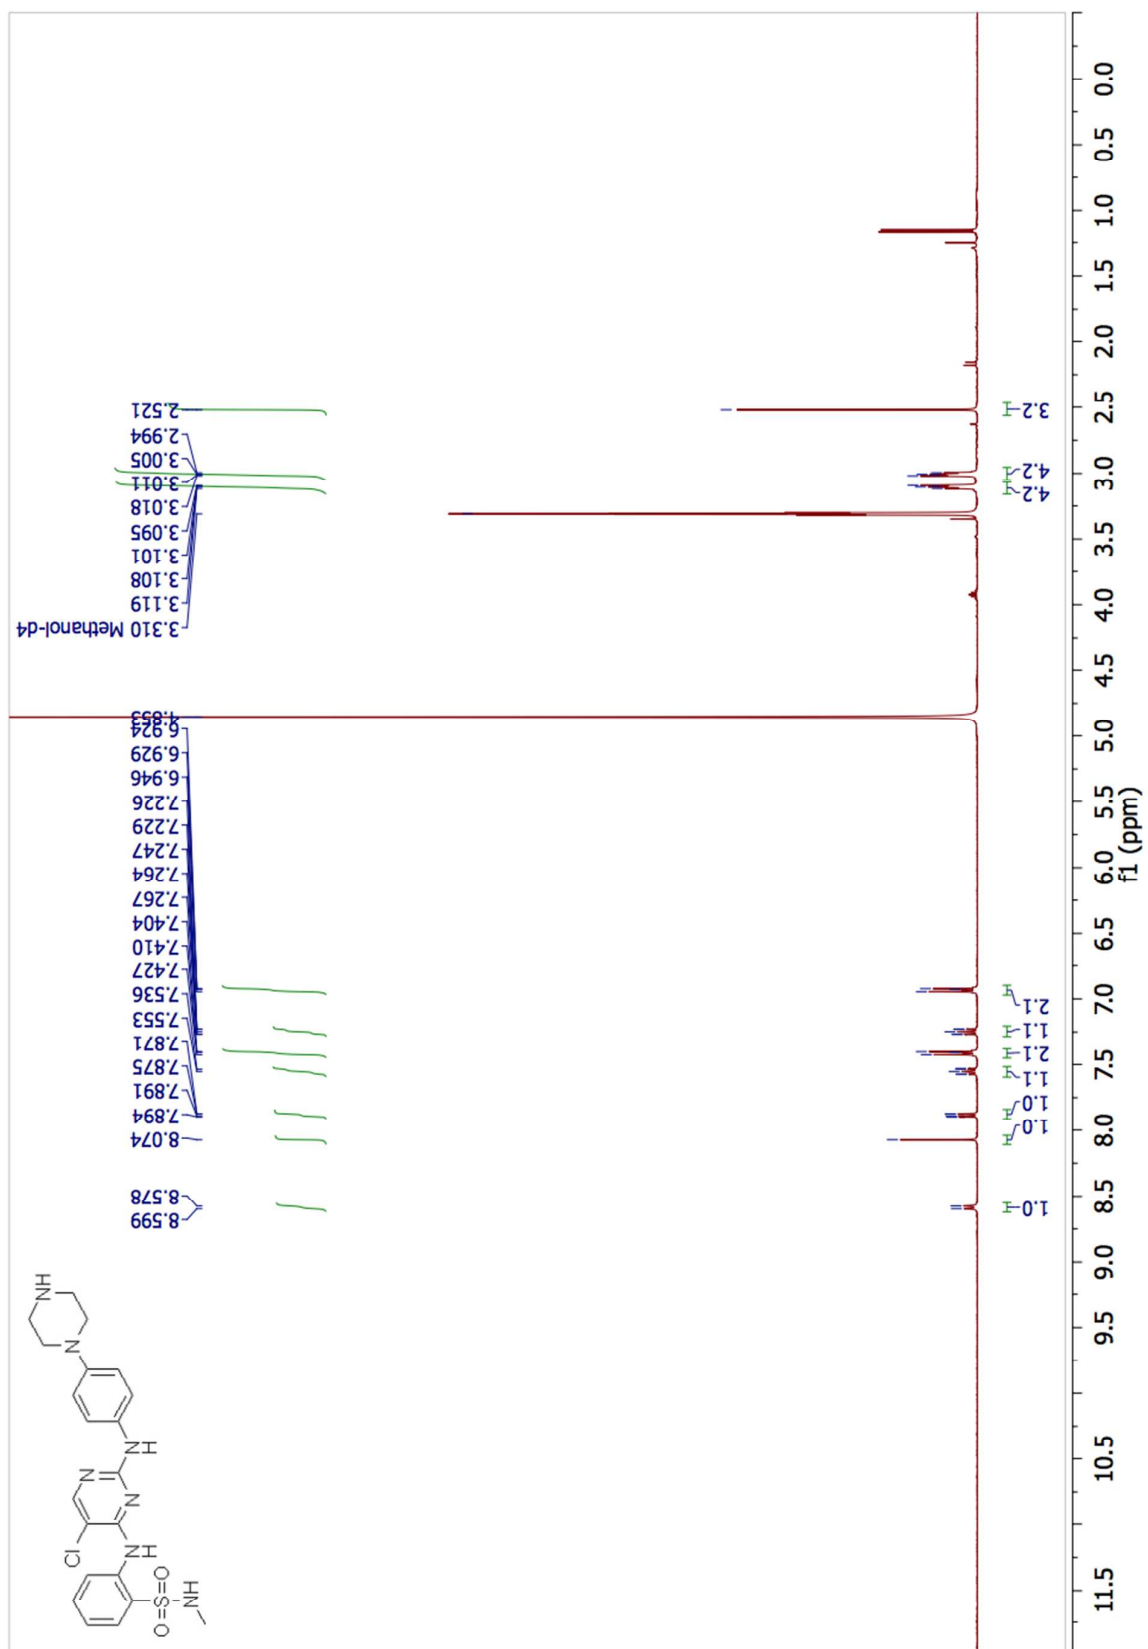

Figure S45: <sup>1</sup>H NMR spectrum of 15.



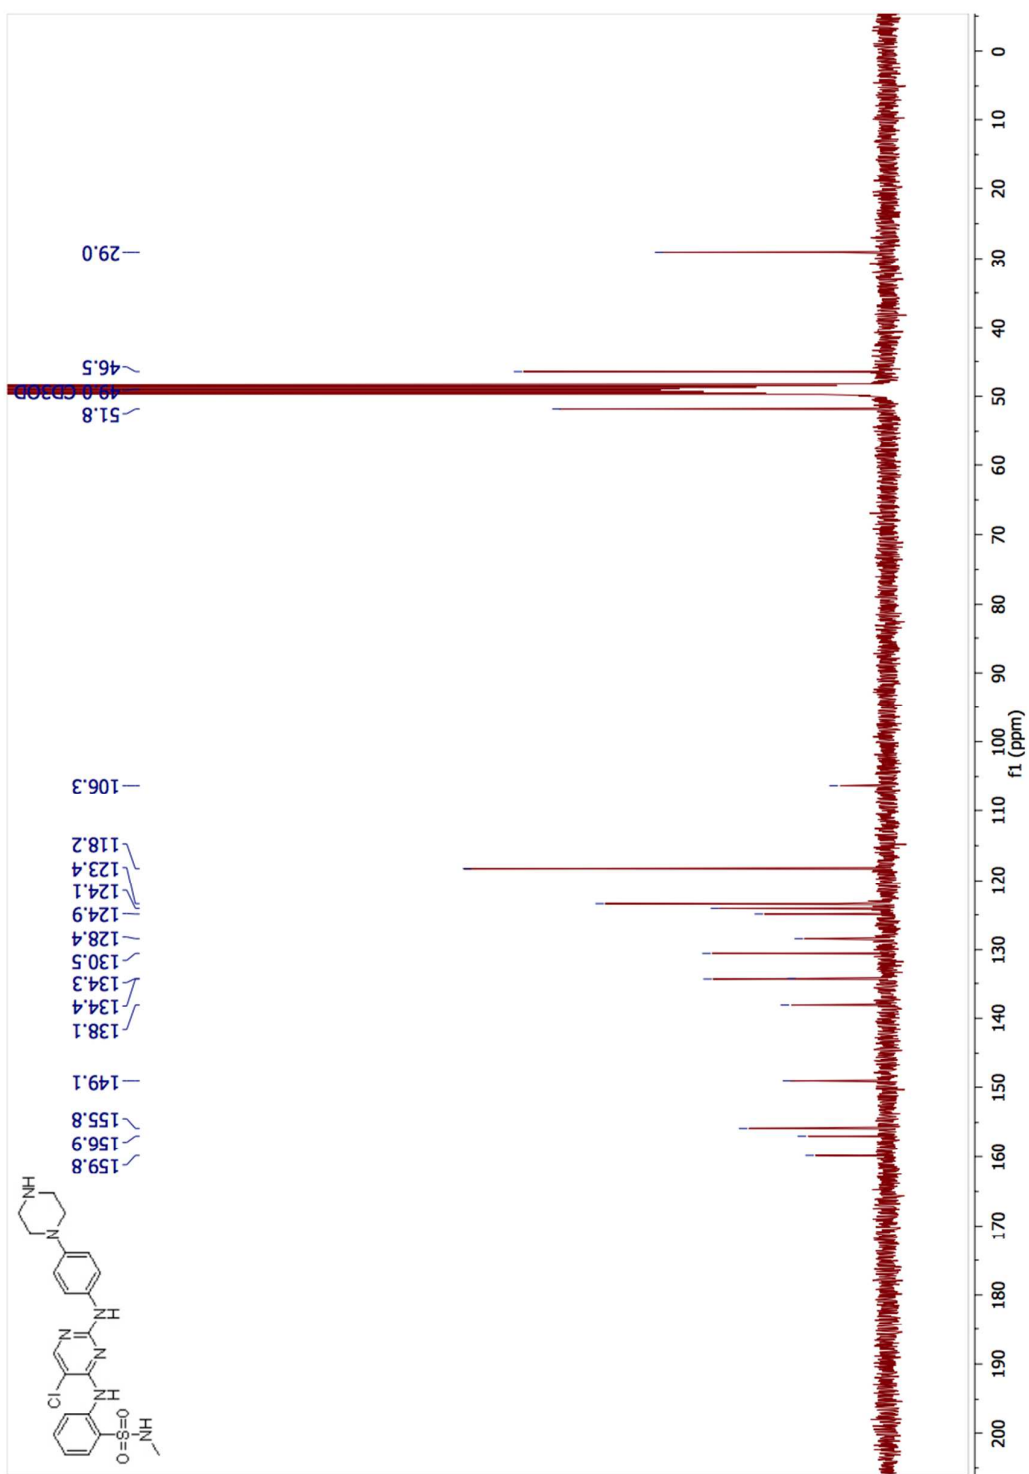

Figure S46:  $^{13}\text{C}$  NMR spectrum of 15.

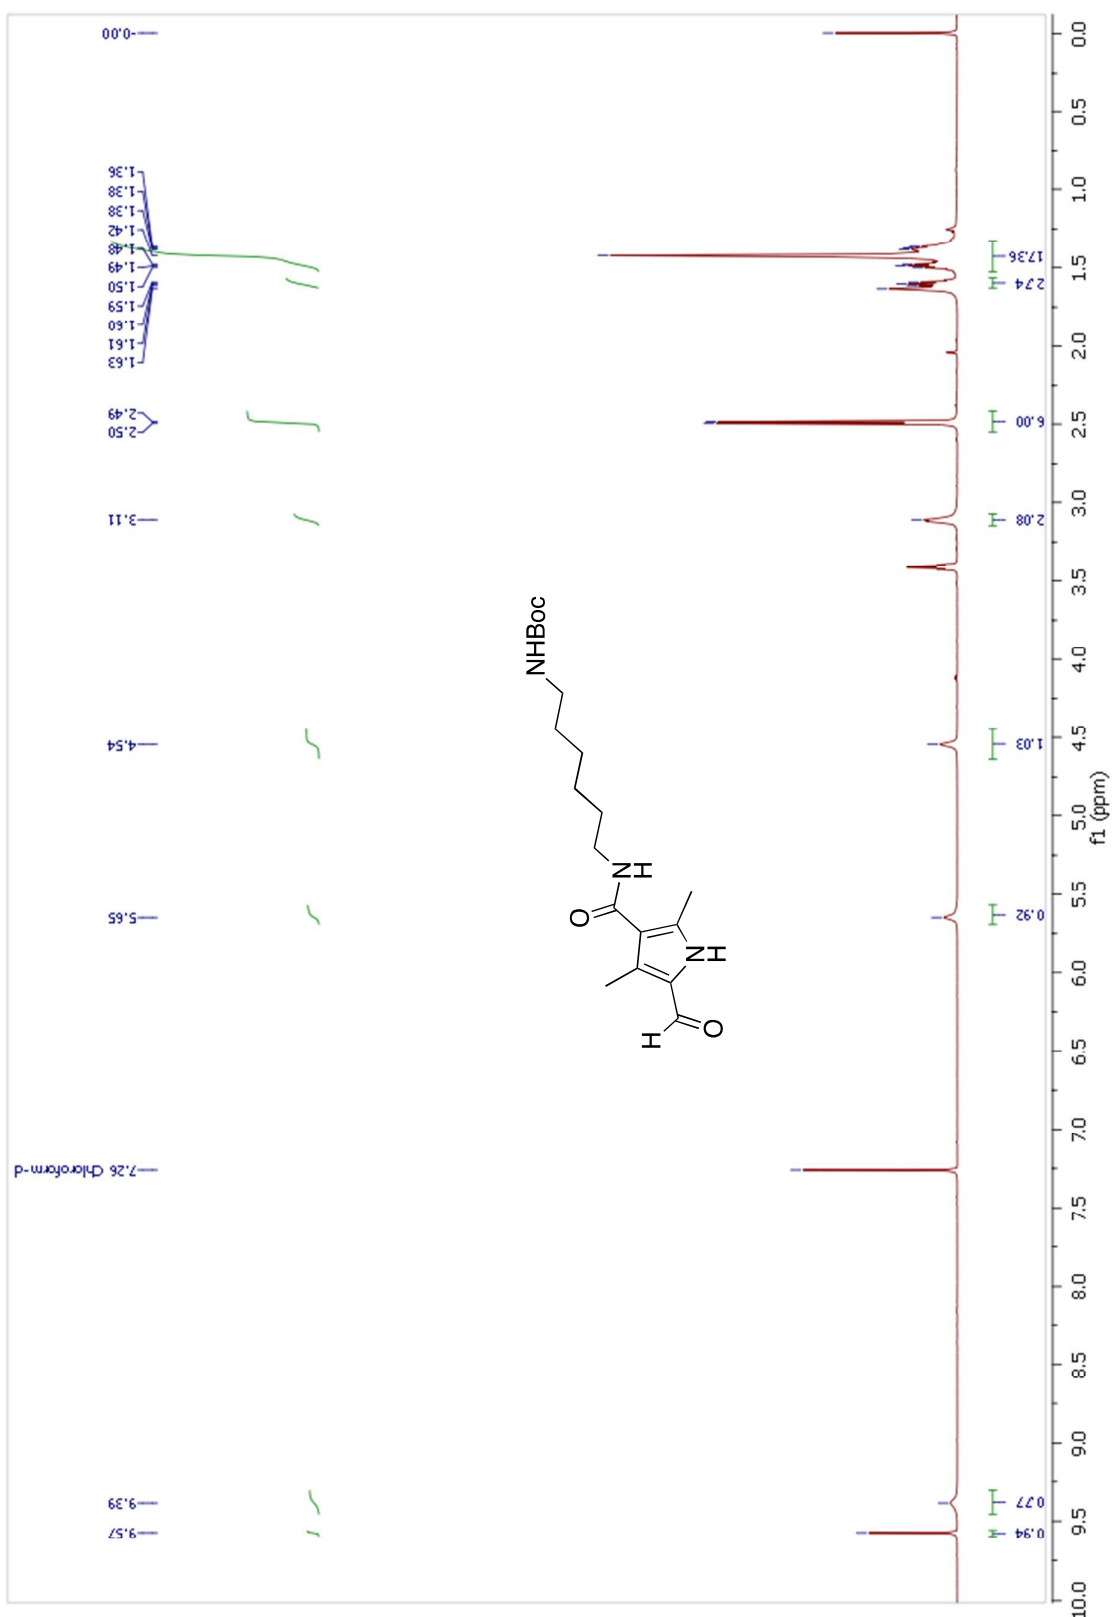

Figure S47: <sup>1</sup>H NMR spectrum of *tert*-butyl (6-(5-formyl-2,4-dimethyl-1*H*-pyrrole-3-carboxamido)hexyl)carbamate

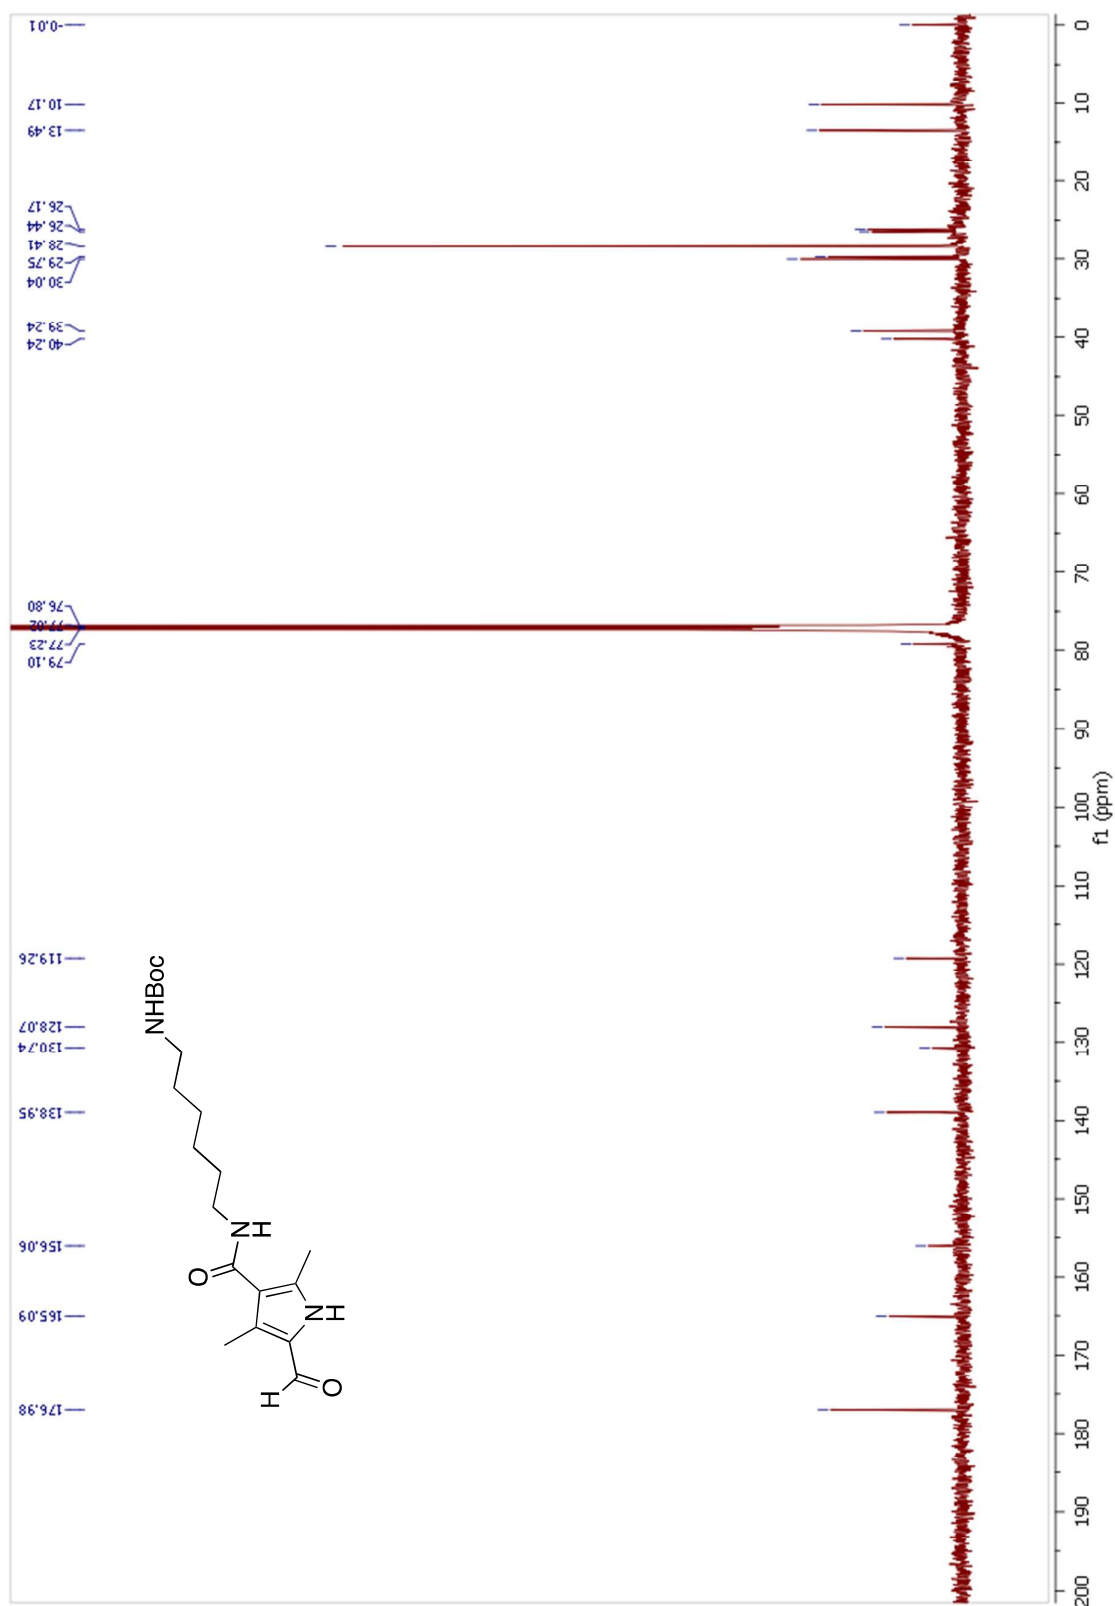

Figure S48: <sup>13</sup>C NMR spectrum of *tert*-butyl (6-(5-formyl-2,4-dimethyl-1*H*-pyrrole-3-carboxamido)hexyl)carbamate

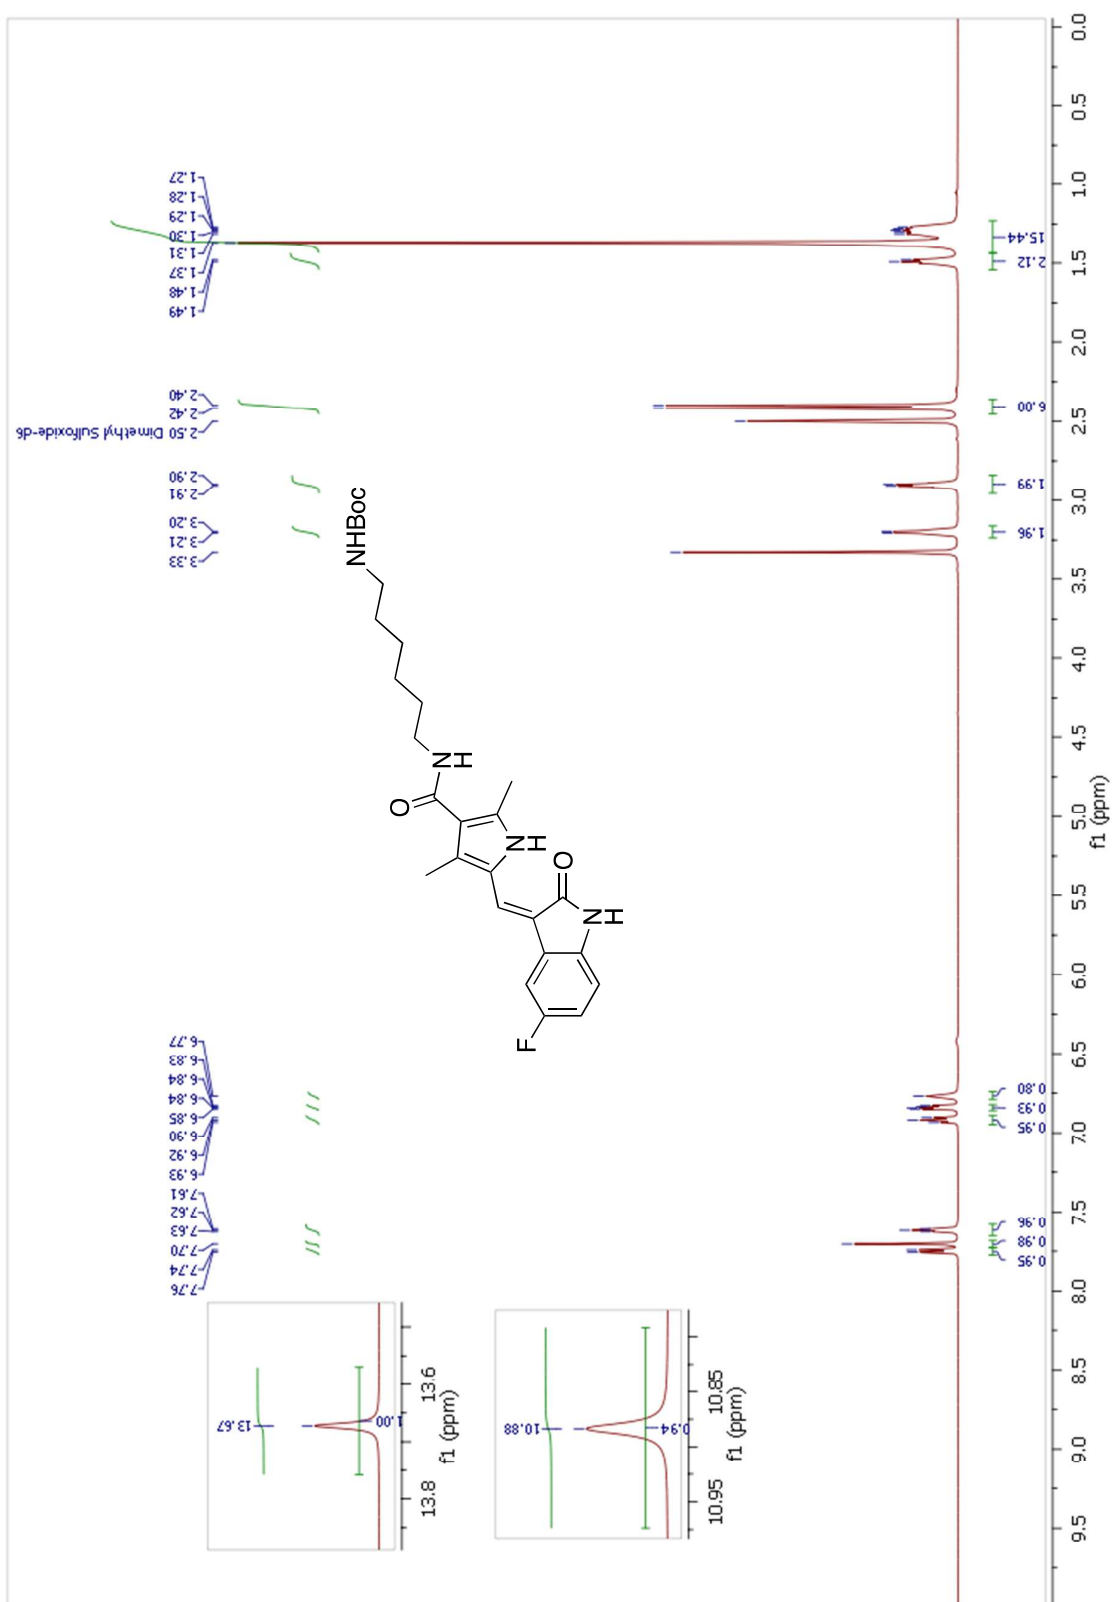

**Figure S49:** <sup>1</sup>H NMR spectrum of (*Z*)-*tert*-butyl (6-(5-((5-fluoro-2-oxindolin-3-ylidene)methyl)-2,4-dimethyl-1*H*-pyrrole-3-carboxamido)hexyl)carbamate

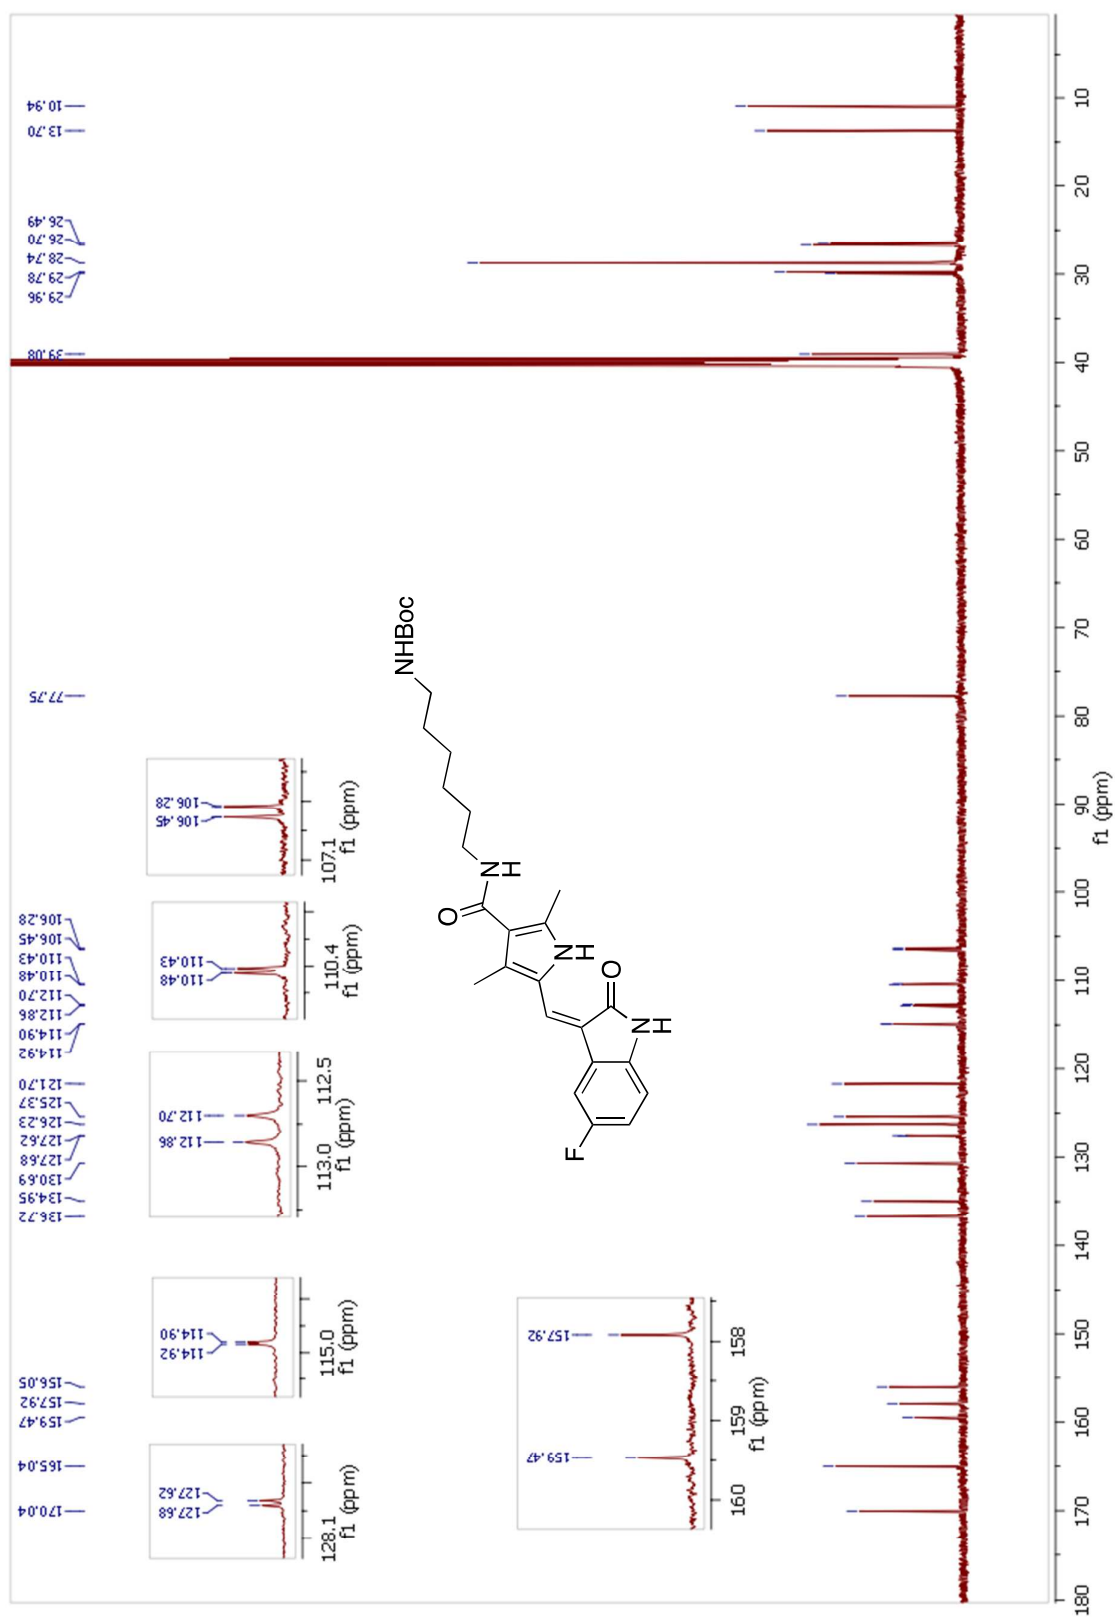

**Figure S50:** <sup>13</sup>C NMR spectrum of (*Z*)-*tert*-butyl (6-(5-(((5-fluoro-2-oxoindolin-3-ylidene)methyl)-2,4-dimethyl-1*H*-pyrrole-3-carboxamido)hexyl)carbamate

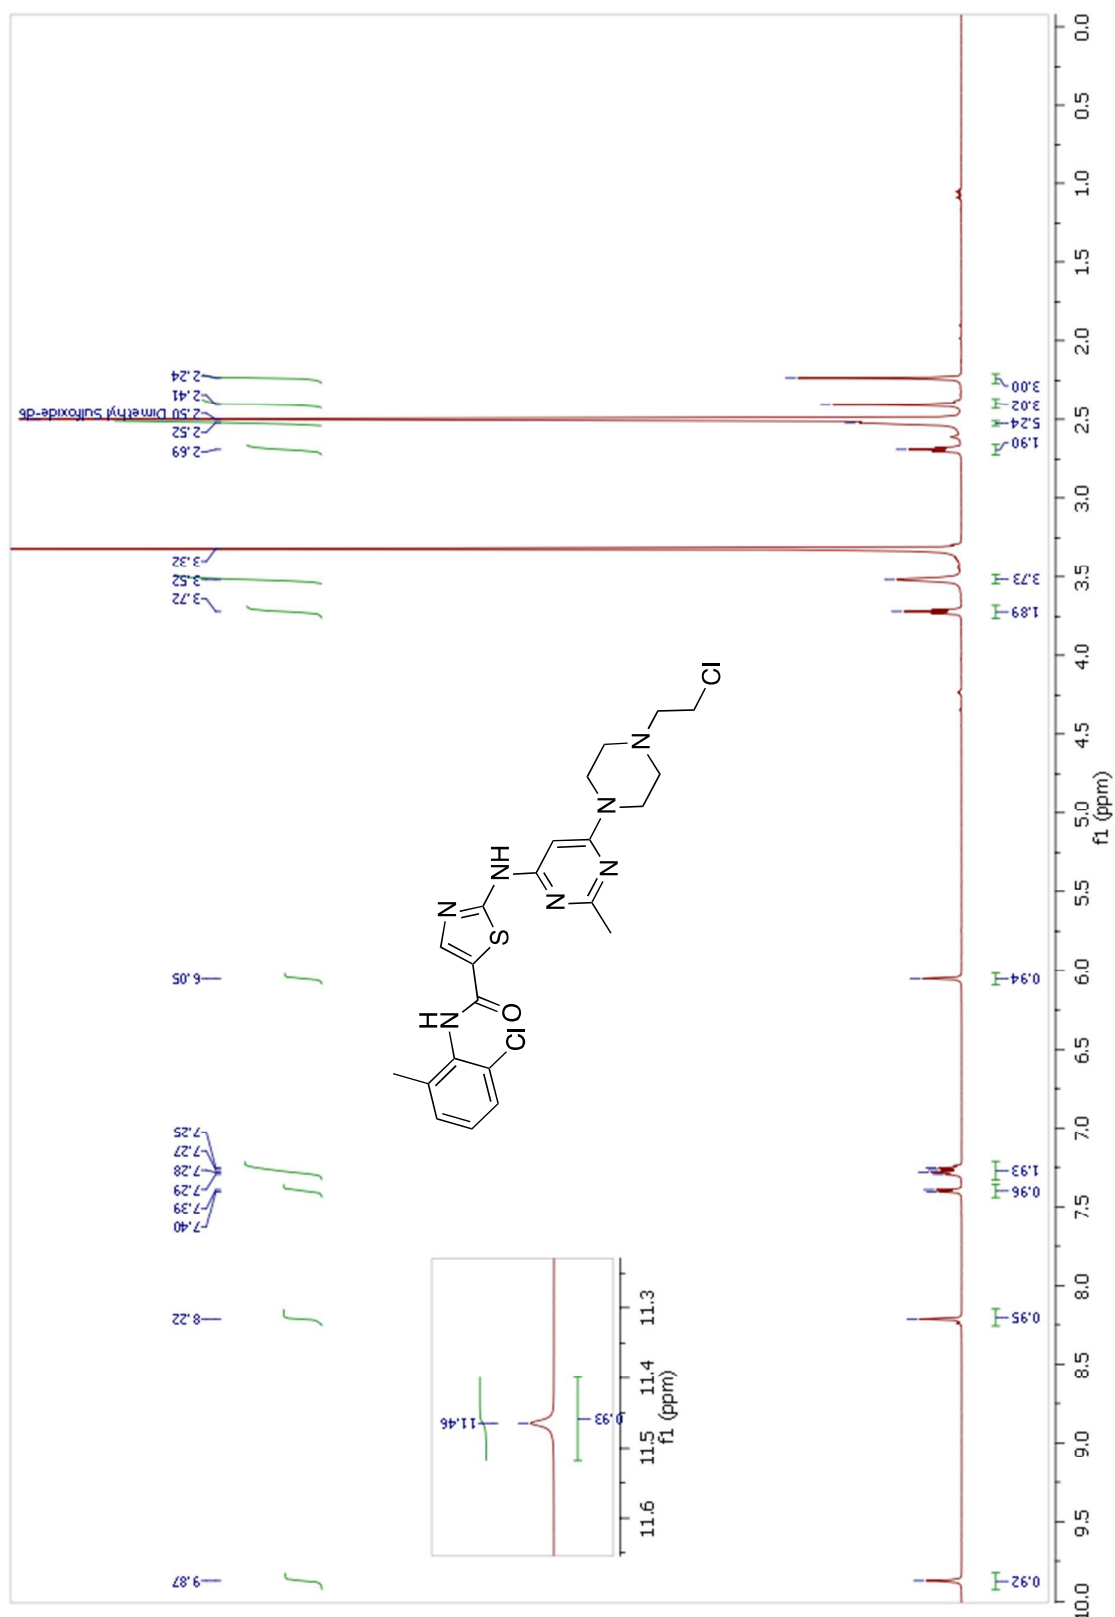

**Figure S51:** <sup>1</sup>H NMR spectrum of *N*-(2-chloro-6-methylphenyl)-2-((6-(4-(2-chloroethyl)piperazin-1-yl)-2-methylpyrimidin-4-yl)amino)thiazole-5-carboxamide

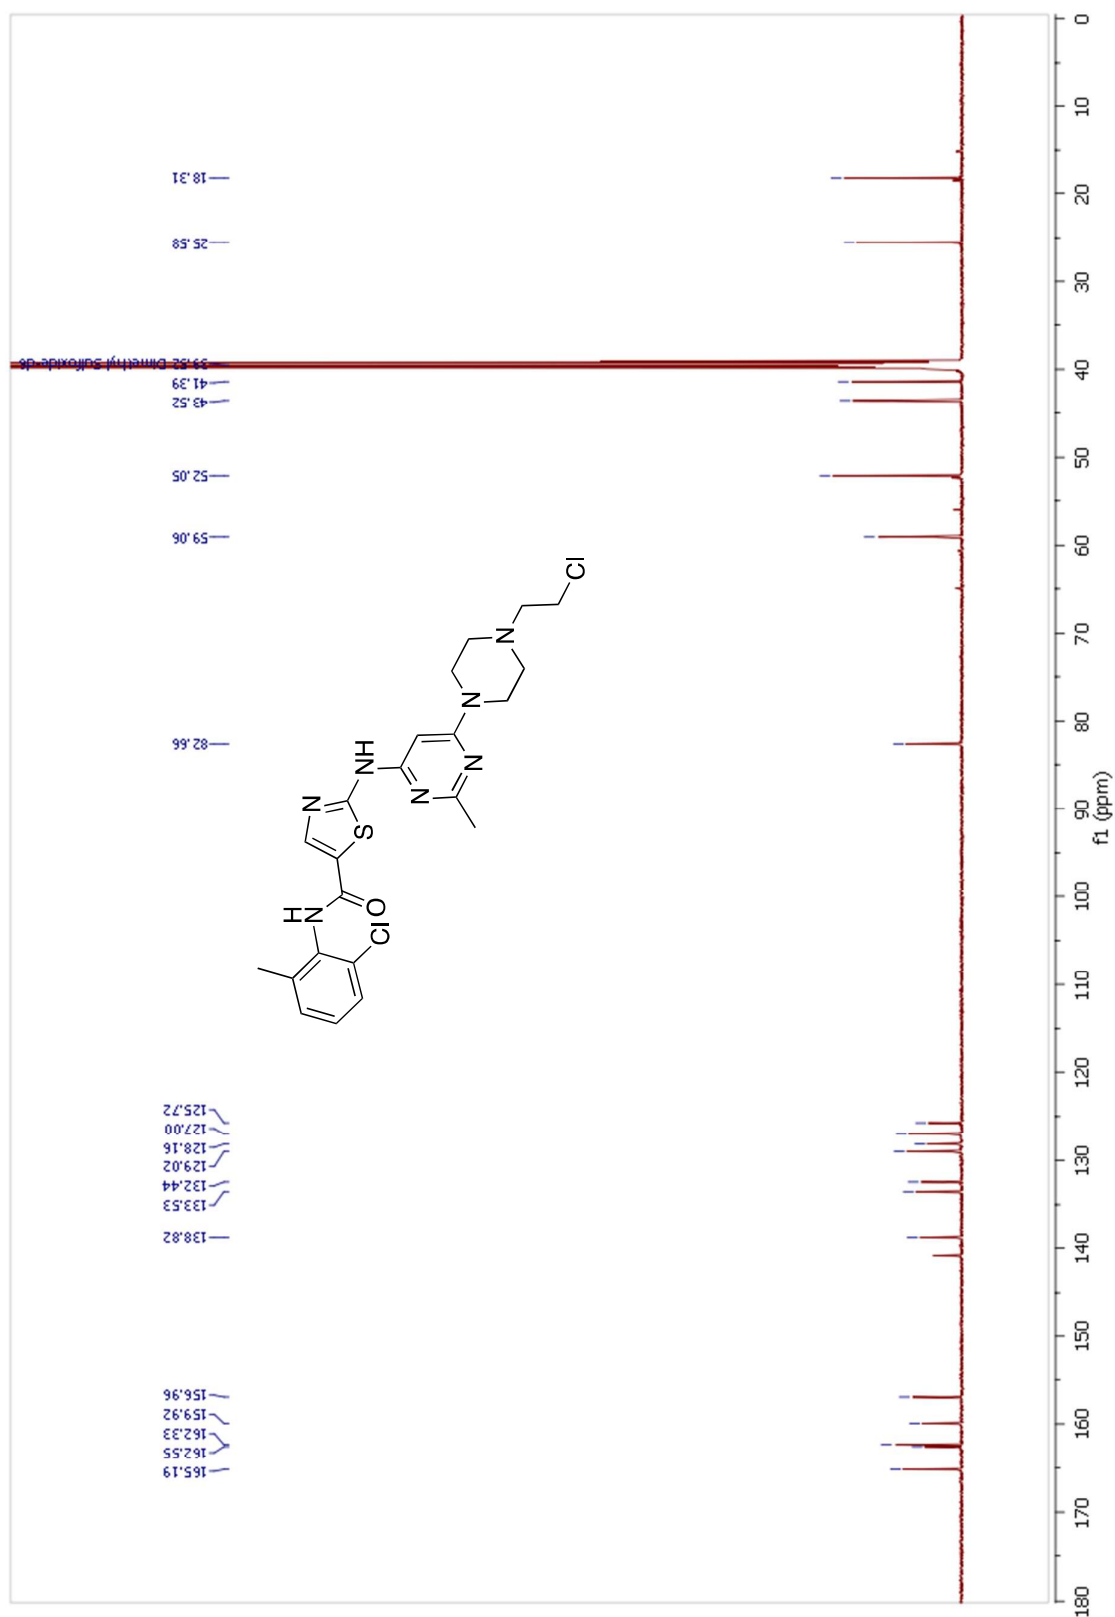

**Figure S52:** <sup>13</sup>C NMR spectrum of *N*-(2-chloro-6-methylphenyl)-2-(((6-(4-(2-chloroethyl)piperazin-1-yl)-2-methylpyrimidin-4-yl)amino)thiazole-5-carboxamide

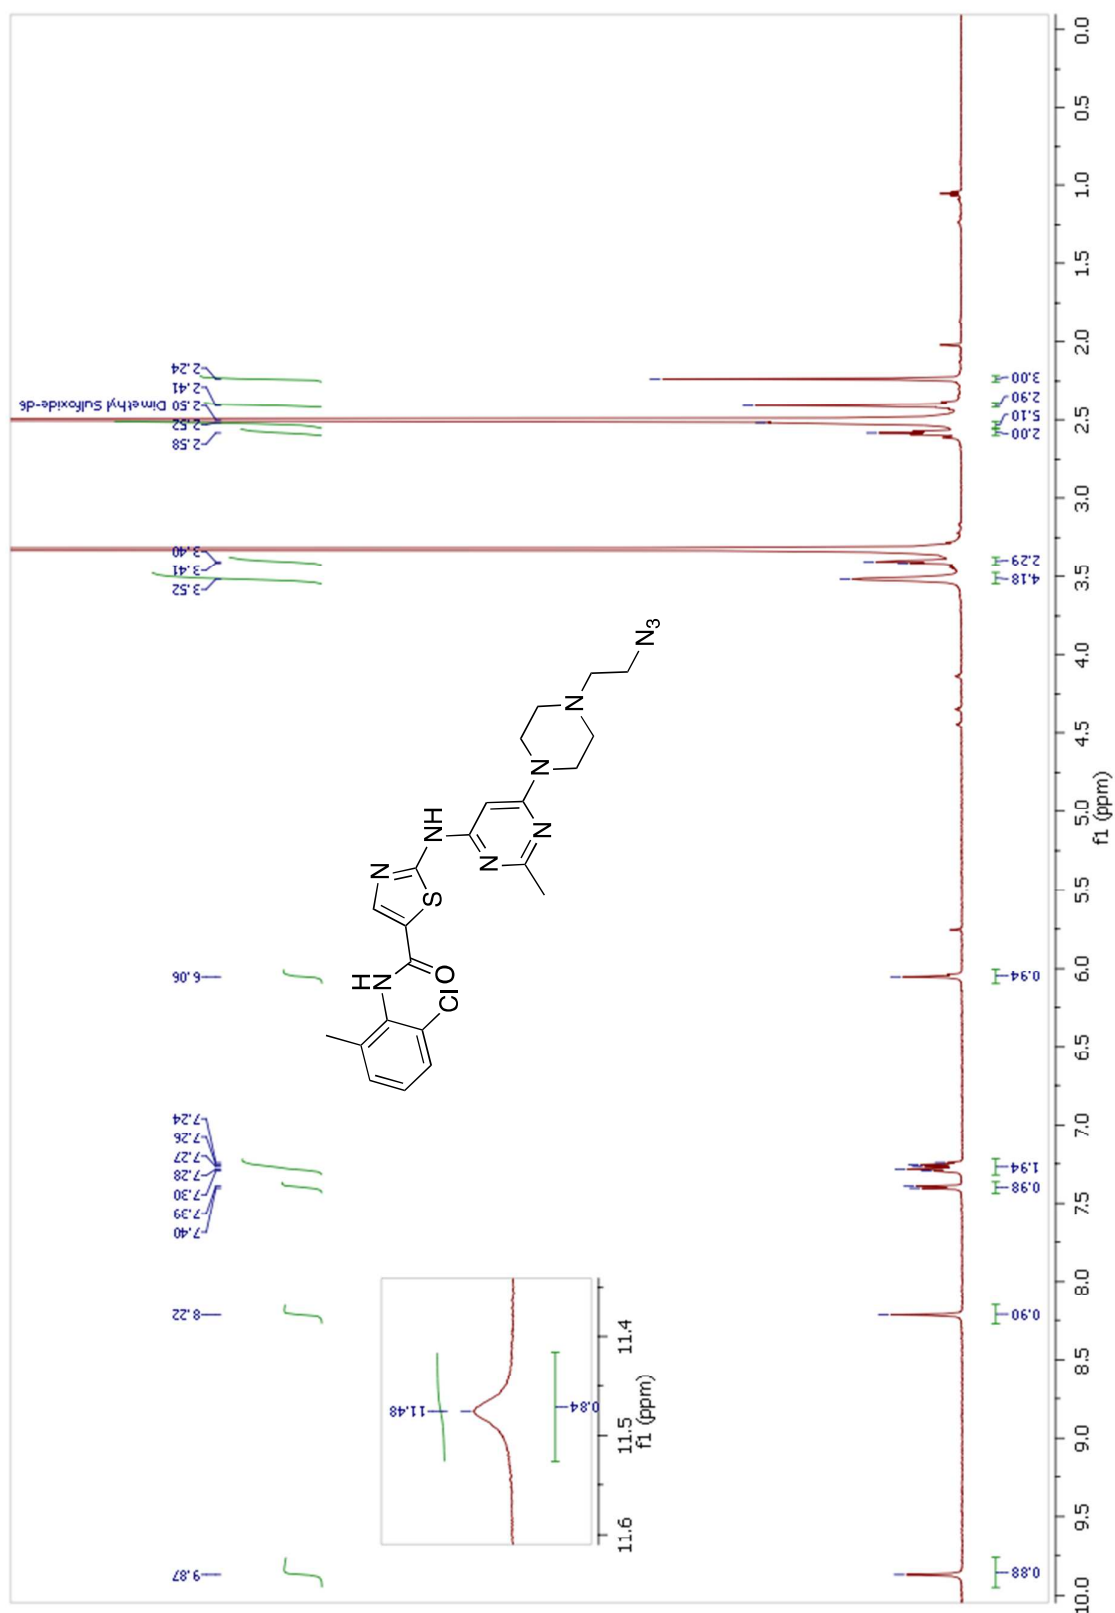

**Figure S53:** <sup>1</sup>H NMR spectrum of 2-((6-(4-(2-azidoethyl)piperazin-1-yl)-2-methylpyrimidin-4-yl)amino)-*N*-(2-chloro-6-methylphenyl)thiazole-5-carboxamide



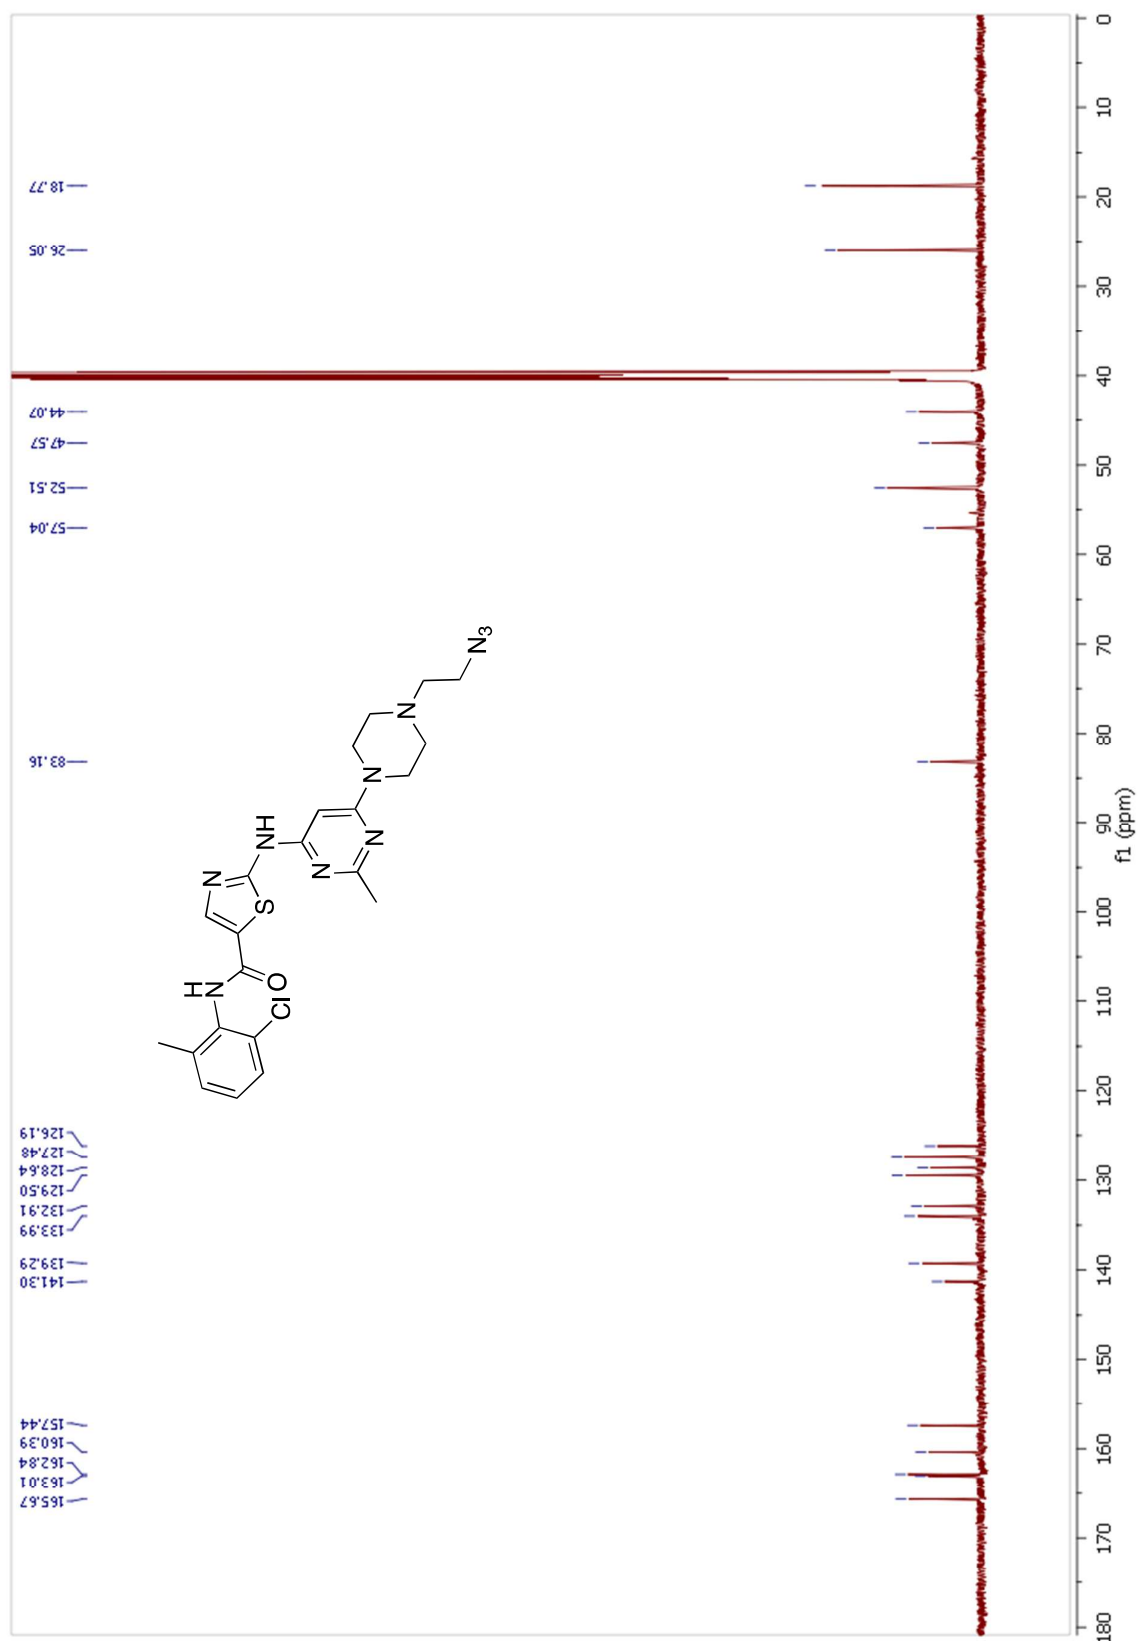

**Figure S54:** <sup>13</sup>C NMR spectrum of 2-((6-(4-(2-azidoethyl)piperazin-1-yl)-2-methylpyrimidin-4-yl)amino)-N-(2-chloro-6-methylphenyl)thiazole-5-carboxamide

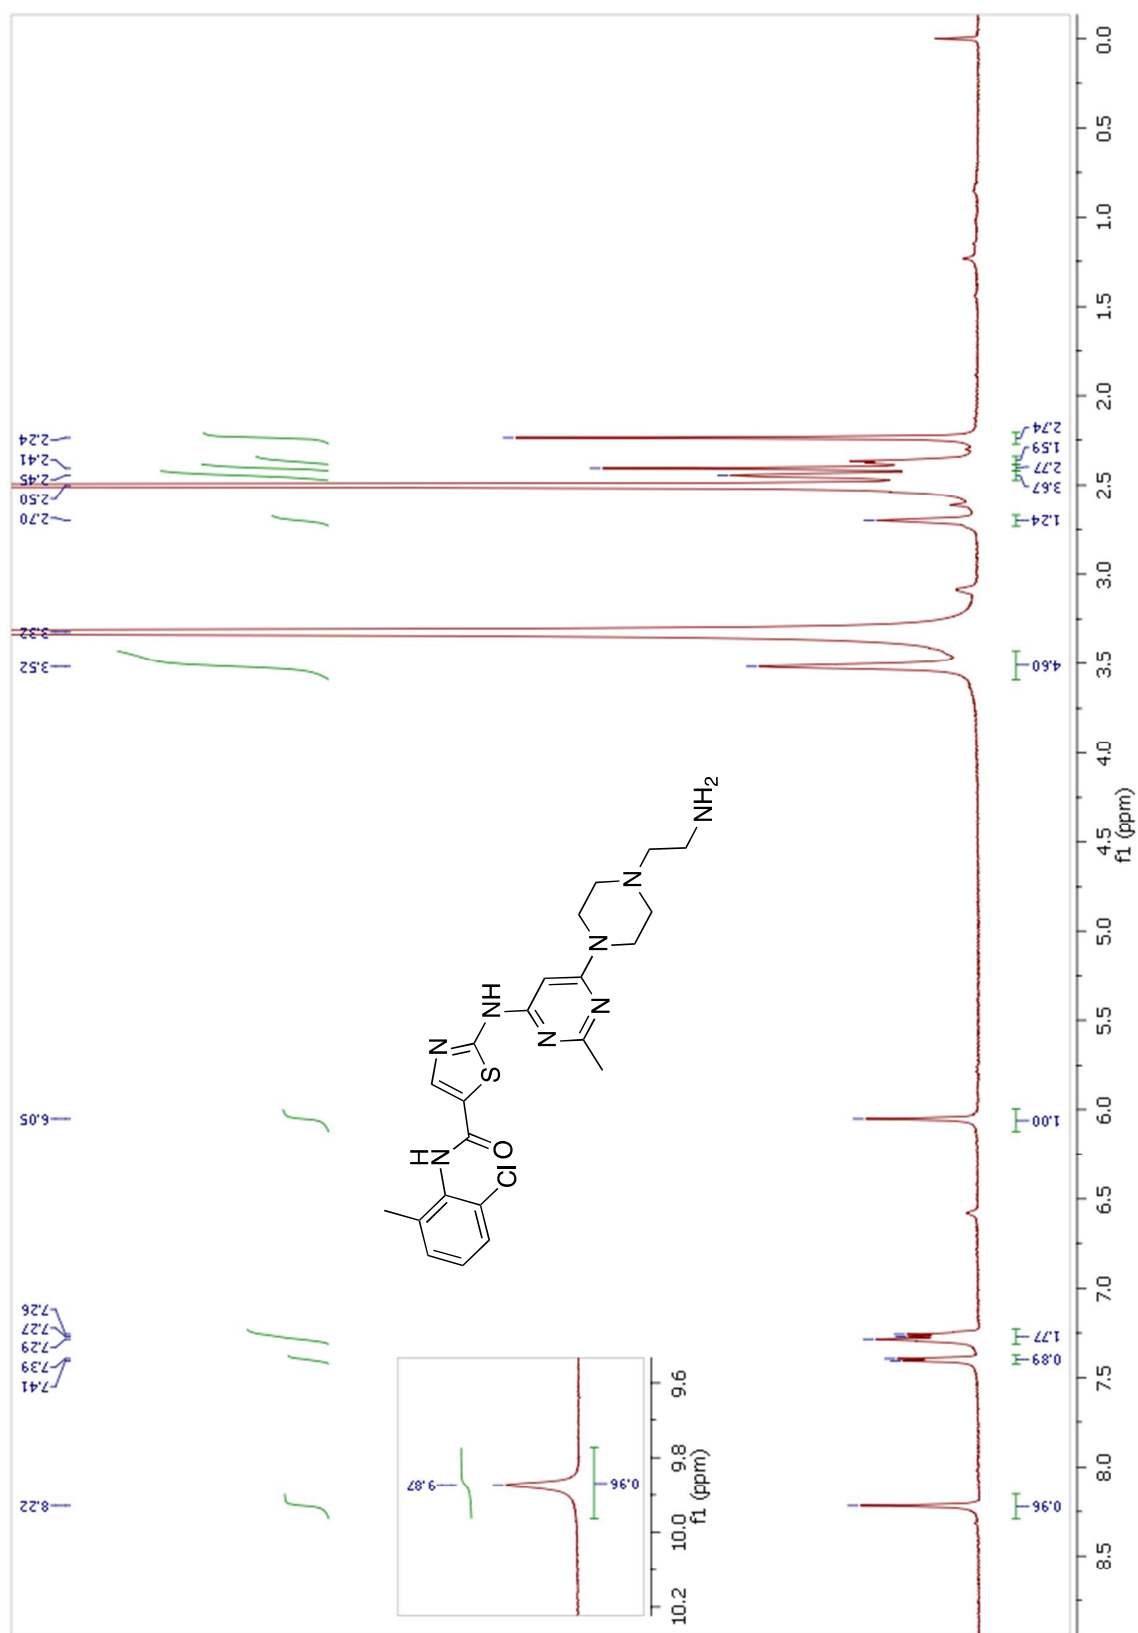

**Figure S55:** <sup>1</sup>H NMR spectrum of 2-((6-(4-(2-aminoethyl)piperazin-1-yl)-2-methylpyrimidin-4-yl)amino)-N-(2-chloro-6-methylphenyl)thiazole-5-carboxamide

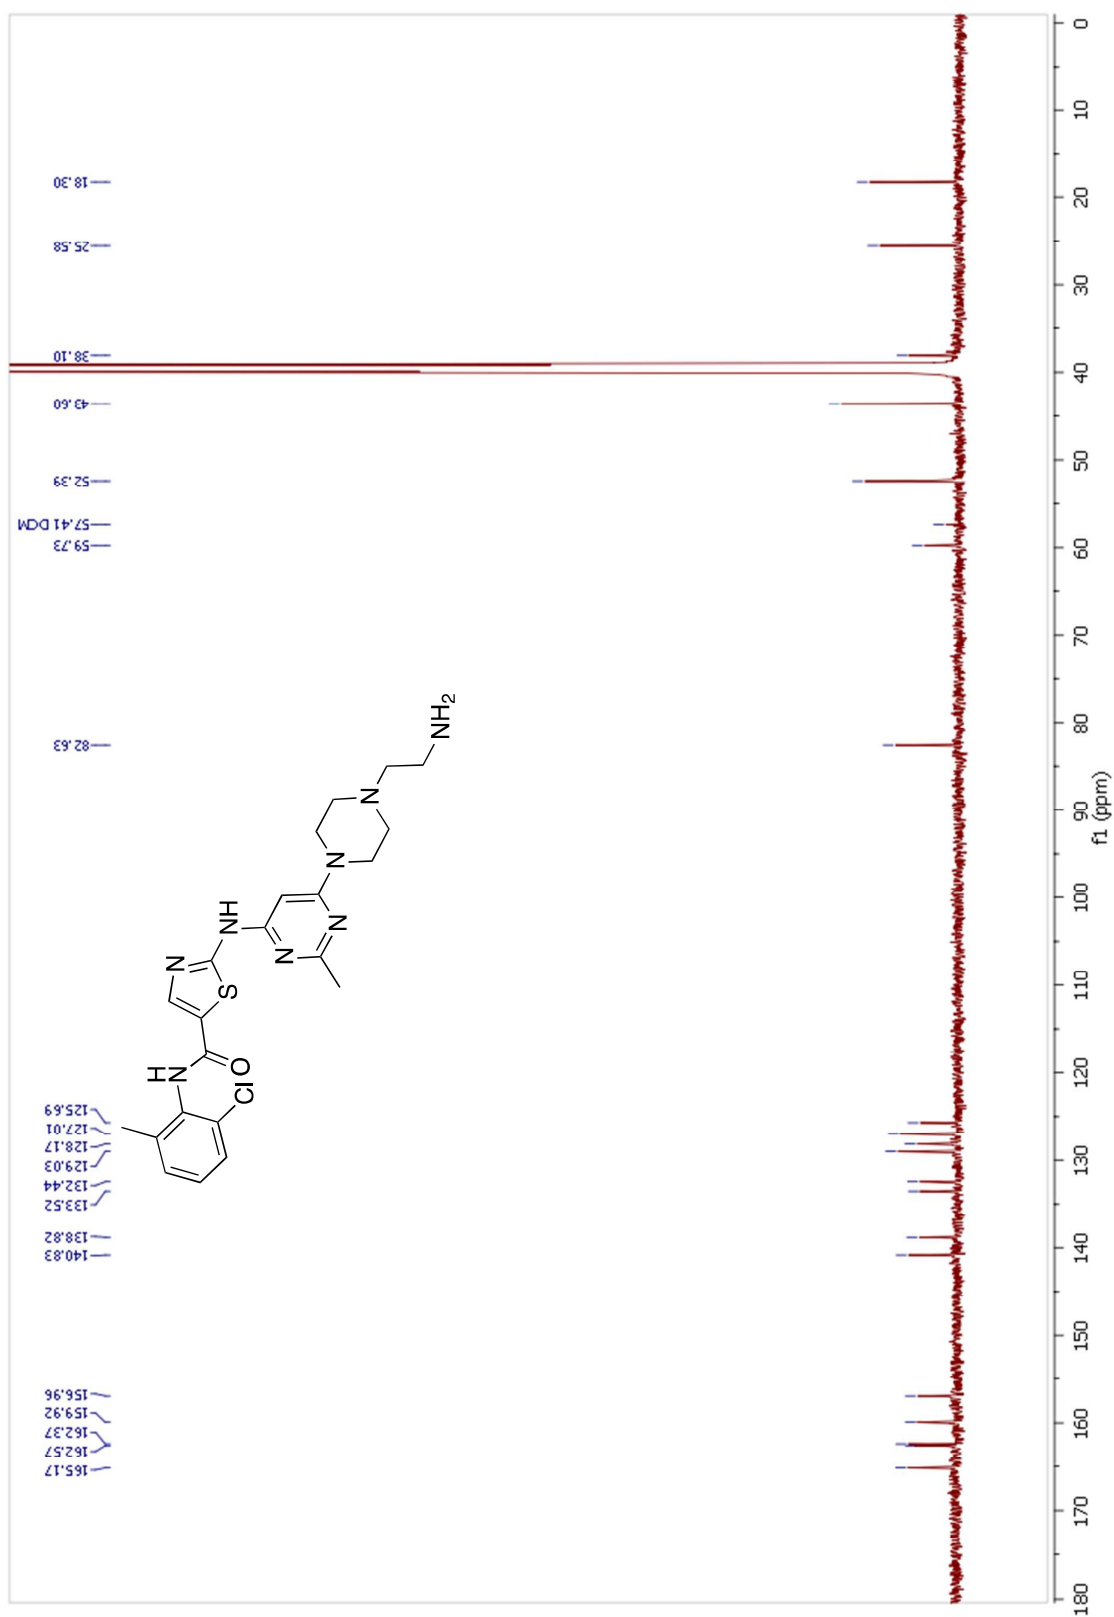

**Figure S56:**  $^{13}\text{C}$  NMR spectrum of 2-((6-(4-(2-aminoethyl)piperazin-1-yl)-2-methylpyrimidin-4-yl)amino)-*N*-(2-chloro-6-methylphenyl)thiazole-5-carboxamide



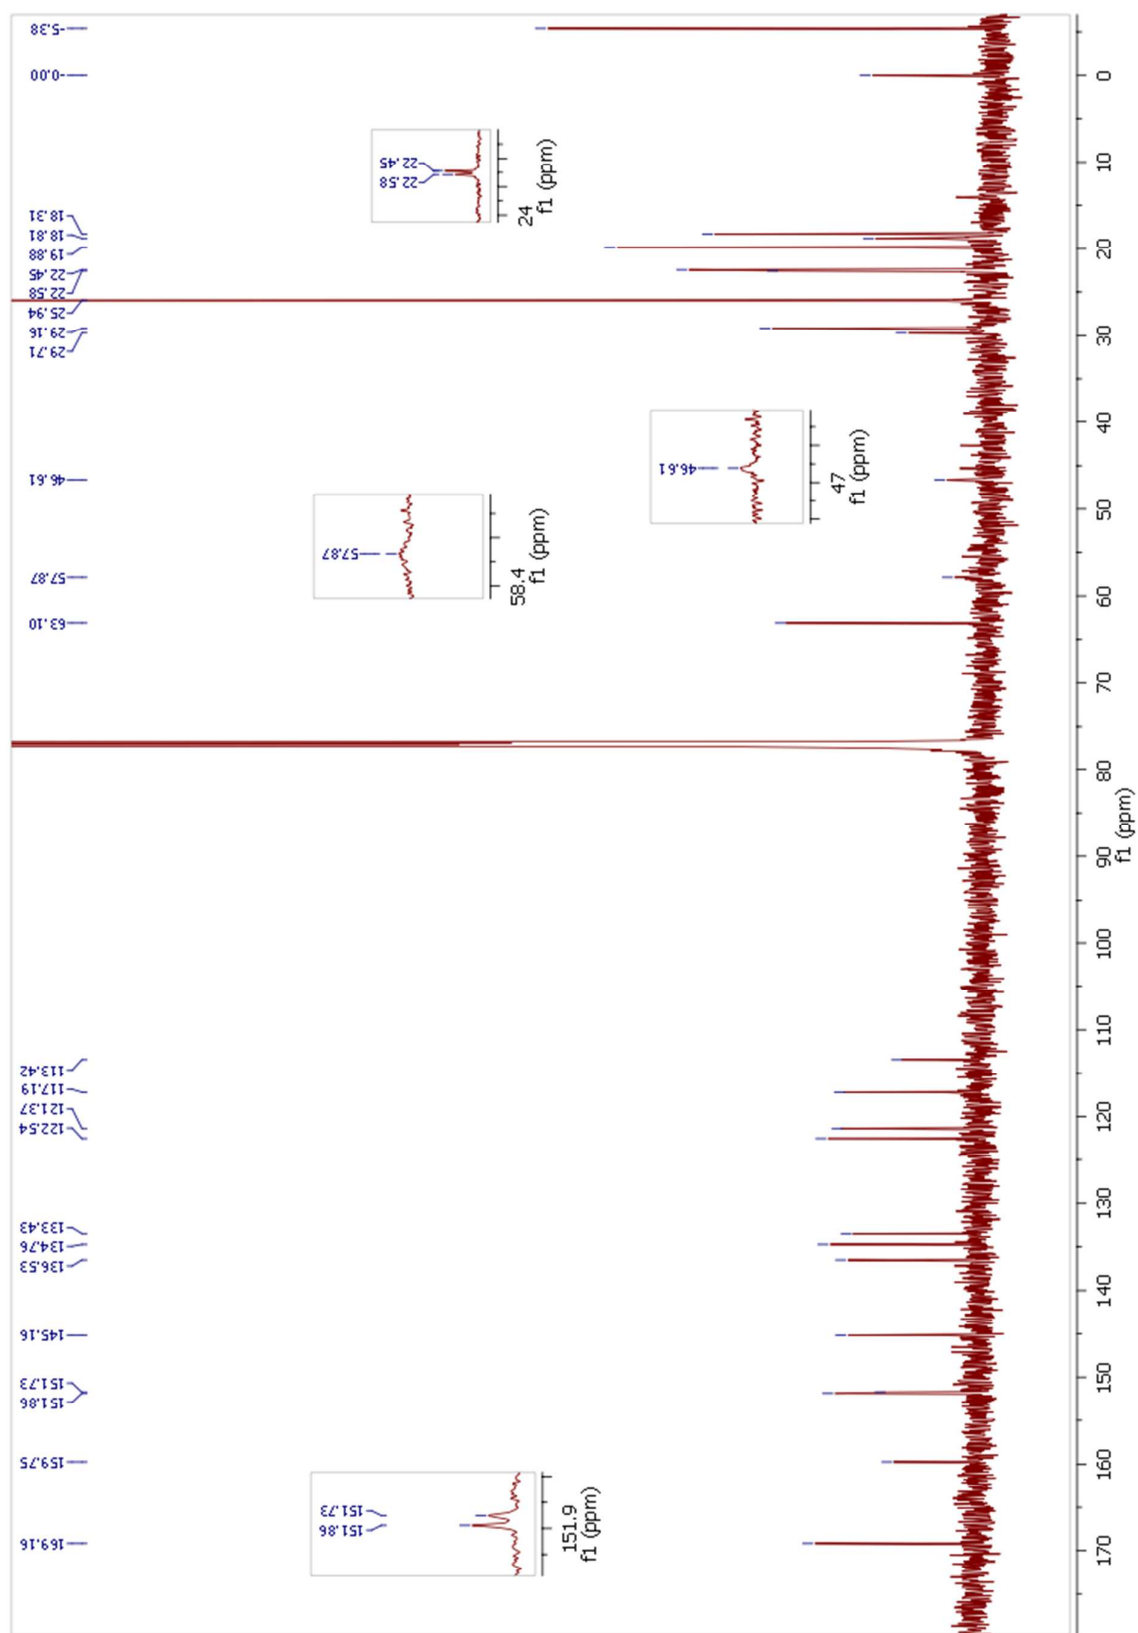

**Figure S58:**  $^{13}\text{C}$  NMR spectrum of (*R*)-4-((2-((1-((*tert*-butyldimethylsilyl)oxy)-3-methylbutan-2-yl)amino)-9-isopropyl-9*H*-purin-6-yl)amino)-2-chlorobenzoic acid [*O*-TBDMS purvalanol B]

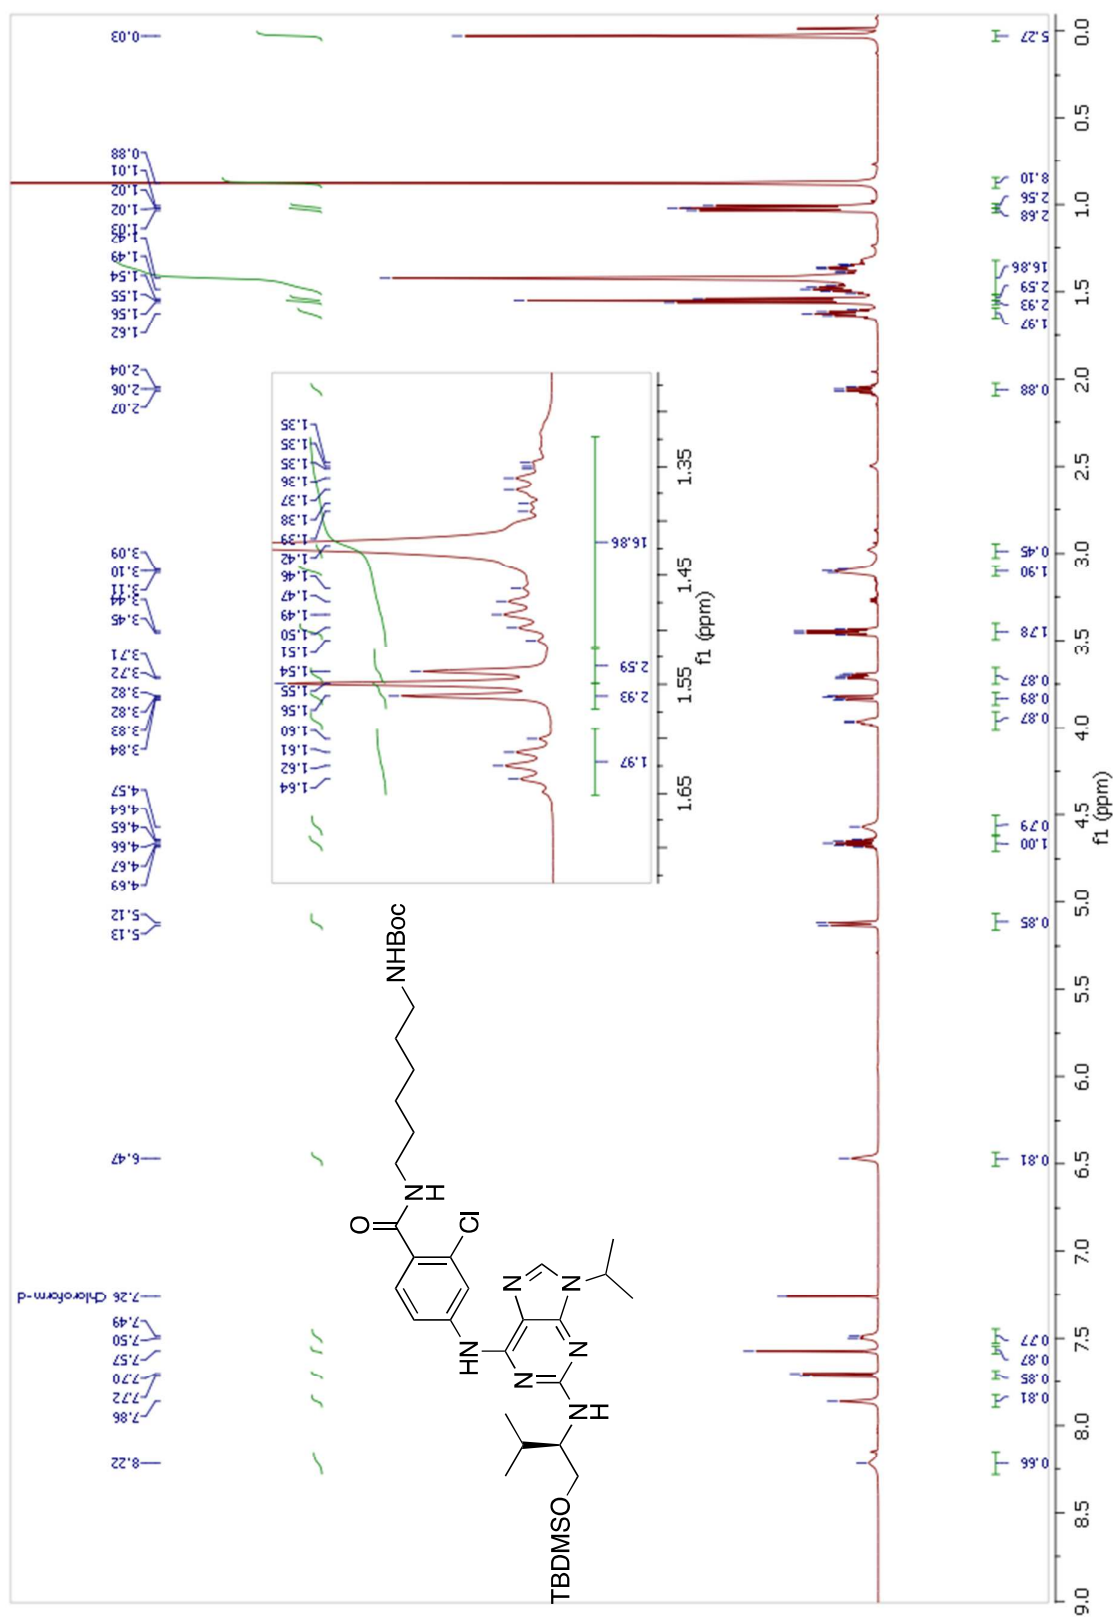

**Figure S59:** <sup>1</sup>H NMR spectrum of (*R*)-*tert*-butyl (6-(4-((2-((1-((*tert*-butyldimethylsilyl)oxy)-3-methylbutan-2-yl)amino)-9-isopropyl-9*H*-purin-6-yl)amino)-2-chlorobenzamido)hexyl)carbamate

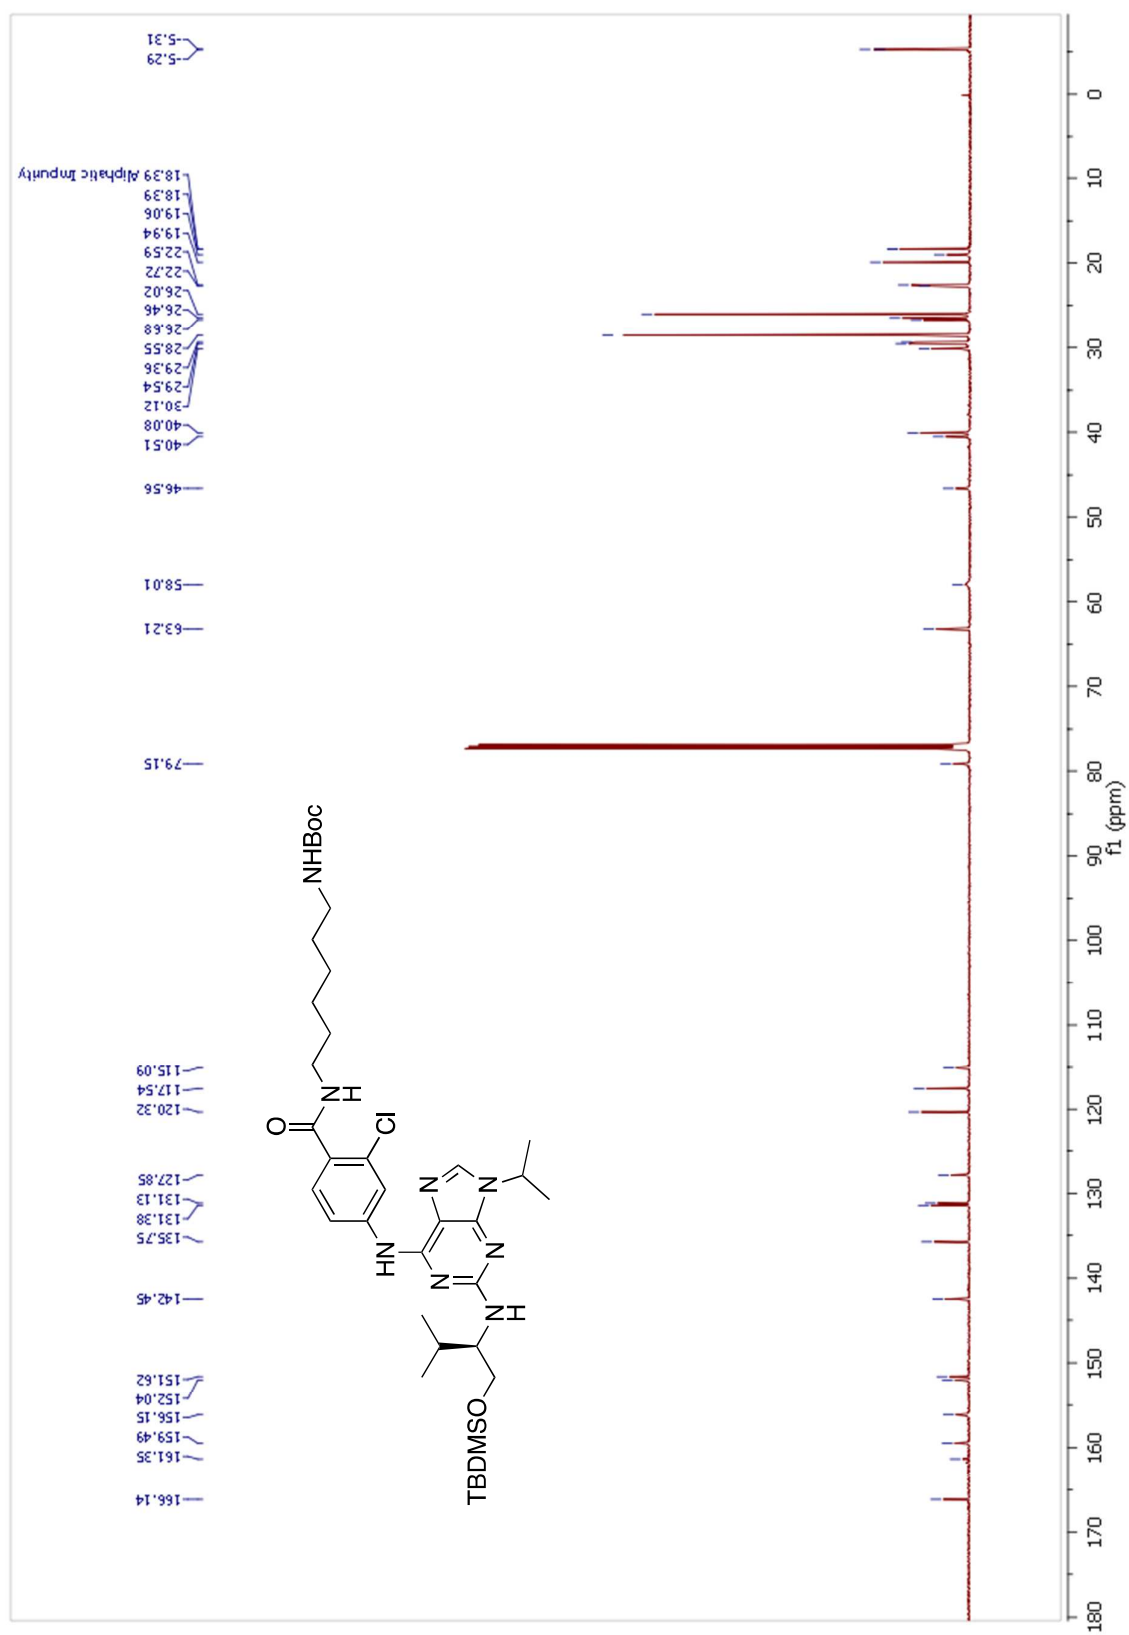

**Figure S60:**  $^{13}\text{C}$  NMR spectrum of (*R*)-*tert*-butyl (6-(4-((2-((1-((*tert*-butyldimethylsilyl)oxy)-3-methylbutan-2-yl)amino)-9-isopropyl-9*H*-purin-6-yl)amino)-2-chlorobenzamido)hexyl)carbamate

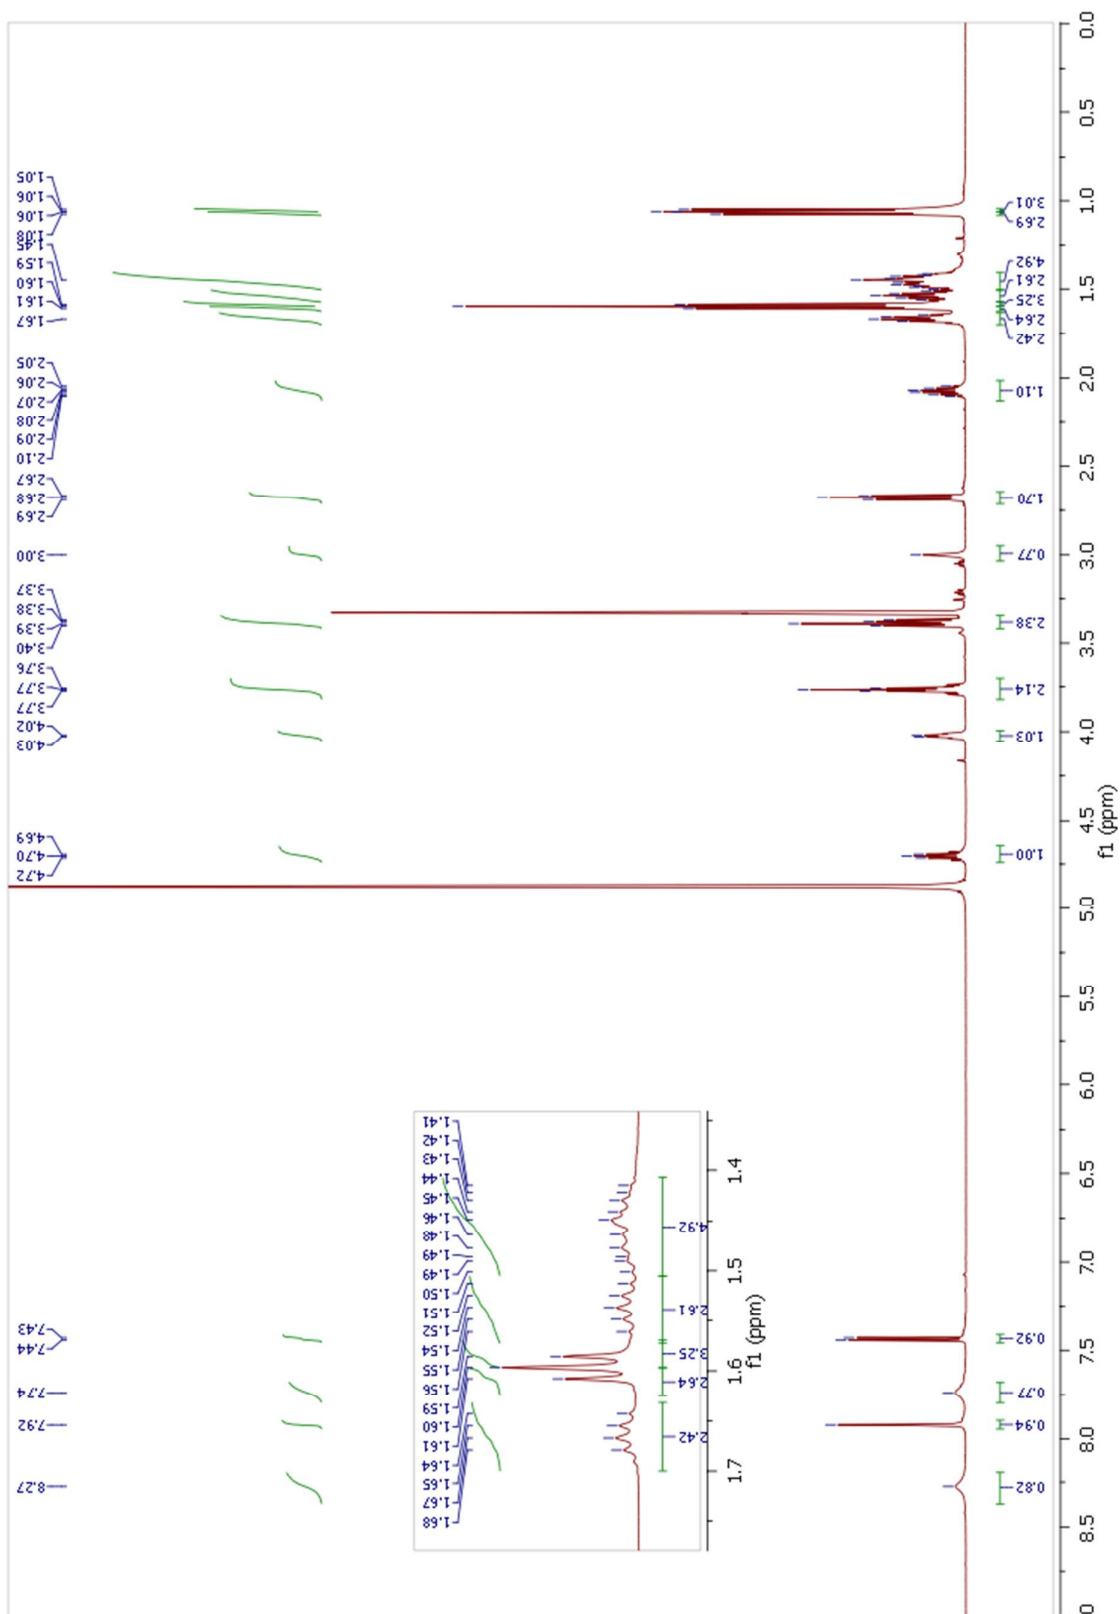

**Figure S61:** <sup>1</sup>H NMR spectrum of (R)-N-(6-aminoethyl)-2-chloro-4-((2-((1-hydroxy-3-methylbutan-2-yl)amino)-9-isopropyl-9H-purin-6-yl)amino)benzamide



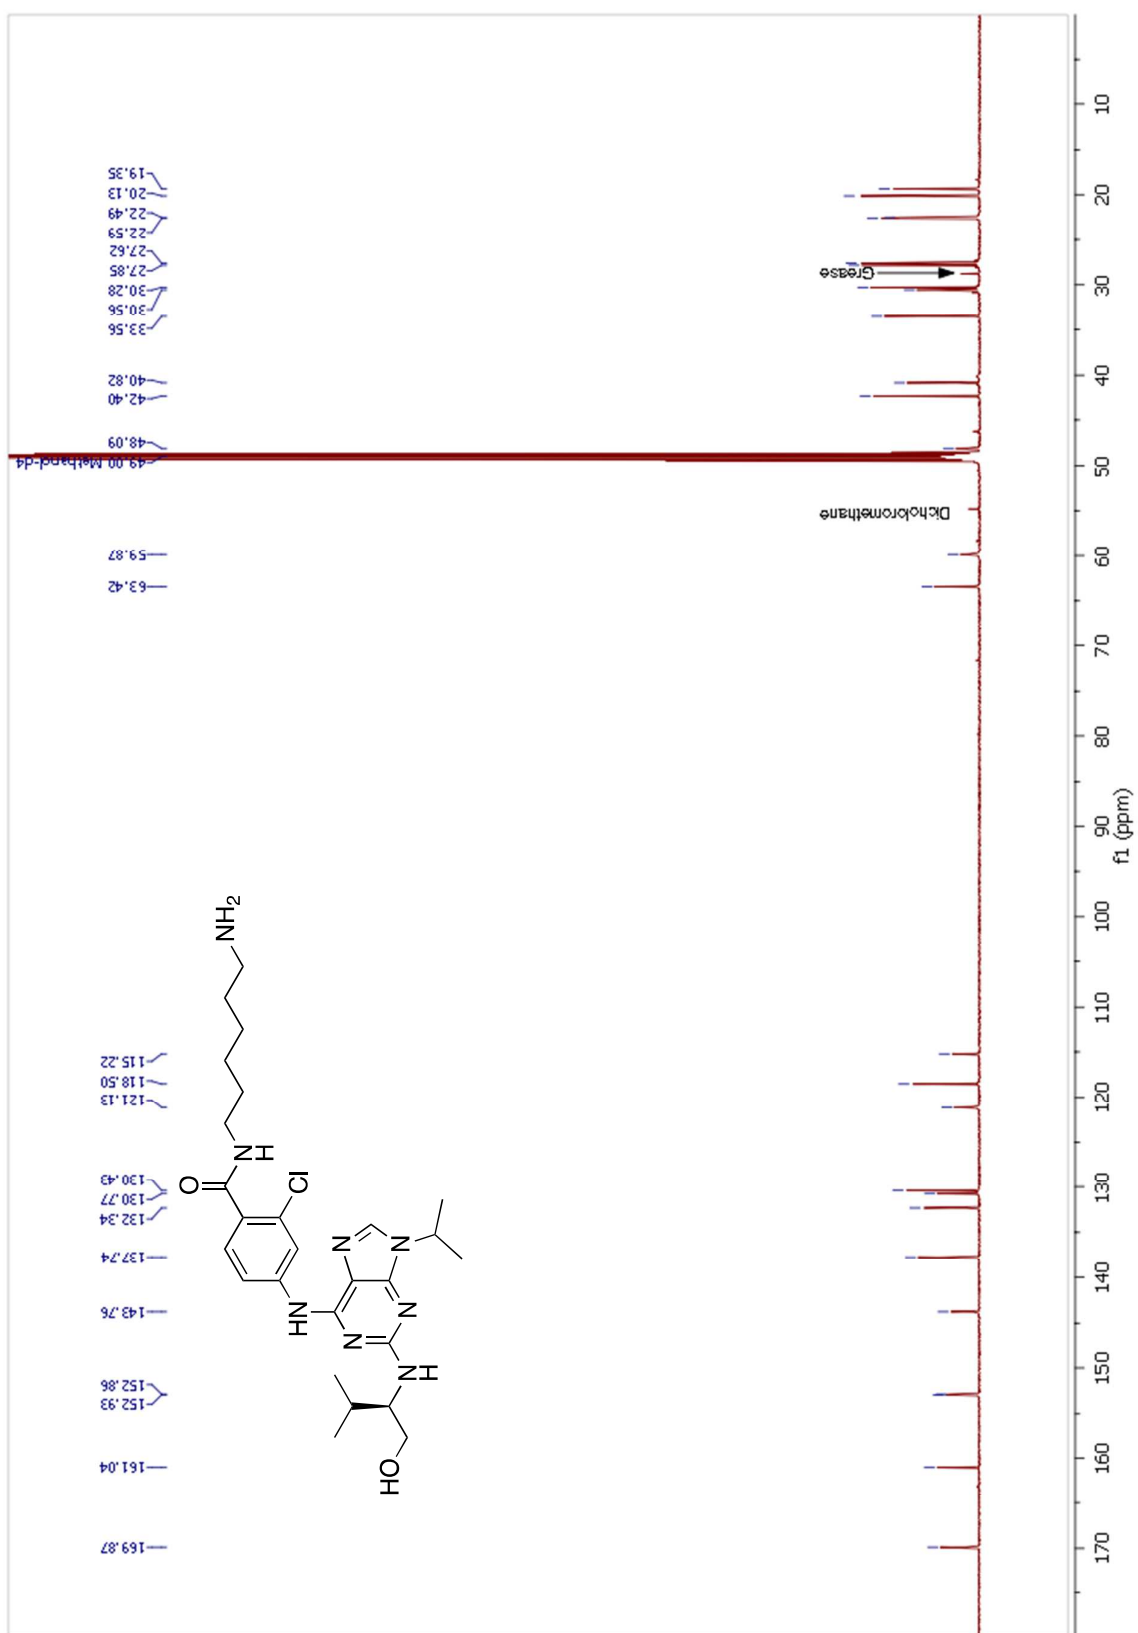

**Figure S62:** <sup>13</sup>C NMR spectrum of *(R)*-N-(6-aminohexyl)-2-chloro-4-((2-((1-hydroxy-3-methylbutan-2-yl)amino)-9-isopropyl-9H-purin-6-yl)amino)benzamide
